## Namenregister / Name index

### A

- Aamodt, Agnar 825  
Abaev, Vasilij I. 68  
Abney, Steven P. 296–297  
Abreu Gomes, Christina 275  
Adams, A. 392  
Aebischer, Paul 609  
Ager, Dennis E. 373  
Agricola, Erhard 422, 436, 439, 459, 466, 468–469  
Aha, David W. 705, 822, 825–826  
Ahapij, A. P. 467  
Ahlers, Astrid 268  
Ahmad, Khurshid 972, 981, 985  
Aitchison, John 730–731  
Aked, J. F. 394  
Albert, Marc K. 705, 822  
Albert, Reika 732  
Alekseev, Pavel M. 308, 314–315, 317, 319, 341, 345, 351, 353–354, 358–359, 369, 372–373, 435, 651, 730, 871, 899–901  
Allegre, Maria 253  
Allen, James 821  
Allen, Jonathan 932  
Allén, Sture 314–317, 373  
Alshawi, H. 812  
Altmann, Gabriel 17–21, 54, 150, 155, 165, 179–180, 184–185, 188–191, 193–199, 201, 204–205, 209–211, 213, 215, 217–220, 223–224, 228–229, 231–236, 238–239, 255–256, 258, 262–268, 270–271, 274, 282–283, 284–286, 288, 299–303, 305–309, 325–335, 337–338, 340, 342, 345, 349–350, 353, 359–360, 365–366, 372–373, 376, 378, 423–424, 426, 429–436, 440, 442–443, 445, 448, 460, 498, 500, 533, 535, 554, 559, 562–563, 569, 579, 581–584, 586–587, 603–604, 627–632, 639, 646, 649–656, 659, 661–664, 666–671, 676–678, 681–684, 686, 724, 730, 740, 743, 752–753, 763–765, 767–769, 772, 783, 792–801, 862, 874, 1003  
Aminev G. A. 865, 874, 989  
Ammermann, Stefan 799  
Amosova, N. N. 465  
Ananiadou, Sophia 138, 982  
Andersen, Ove K. 934  
Anderson, John R. 251  
Anderson, Jonathan 909, 914  
Anderson, Lloyd B. 560  
Andoo, Tsunemasa 83  
Andreev M. P. 865, 874  
Andreev, Nikolaj D. 70, 72–73, 192, 603  
Andreev, Sergej 752, 759  
Andreeva, Lidia D. 73  
Andreevskaja, A. V. 461  
Andrezen, Vladimir 925, 927  
Andrukovič, P. F. 461  
Angelova, Galina 902  
Anisimov, Anatolij V. 925  
Ansaldò, Ana Inés 894  
Anshen, Frank 248, 250, 252–253  
Anstensen, Ansten 373  
Antonov, Anatolij V. 913  
Antosch, Friederike 376  
Anttila, Raimo 373–374, 634, 701  
Apollonskaja, Tat'jana A. 905, 928  
Apresjan, J. D. 465  
Arai, Kazuhiro 842  
Araki, Tetsuo 941  
Arapov, Michail V. 4, 149, 309, 321, 372, 461, 639, 652, 781, 793, 795  
Archangeli, Diana 784  
Archeljuk, V. V. 467, 469  
Ardila, Alfredo 893  
Arens, Hans 17–18, 373, 580, 641, 664–666, 668, 676–677  
Argamon, Shlomo 827  
Arnold, I. V. 373–374, 634, 701  
Arnold, Vladimir I. 411  
Aronoff, Mark 227, 243, 247–248, 250, 252–253  
Artem'eva Ol'ga A. 900  
Arvaniti, Amalia 136–137  
Asai, Tooru 92  
Ashby, W. Ross 74  
Ashkinazi, Vitalij 926  
Askedal, John Ole 274, 275, 589  
Atkeson, Christopher 825  
Atkinson, Q. D. 642  
Atkinson, Richard C. 898  
Atwood, E. B. 510  
Atwood, N. K. 914  
Auerswald, M. 813, 817  
Augst, Gerhard 227  
Aust, H. 808  
Ax, Wolfram 233  
Azar, Moshe 390, 747  
Azimov, Ildar G. 901–902  
403–404, 408, 652, 734, 792, 795, 798, 800, 944–945  
Bagheri, Dariusch 191, 195, 199, 201, 204, 794  
Bahl, L. 808, 810, 812  
Bailey, Charles-James 787  
Bailey, Richard W. 370, 372–373, 377, 379  
Bailin, Alan 897, 902–903  
Bajerowa, Irena 126–127  
Bajтанаeva, Dinaida A. 860, 863, 868–869  
Bak, Per 362  
Baker, Eva L. 914  
Baker, James 293  
Baker, John P. 901  
Baker, Sidney J. 373  
Bakker, Dik 275, 556, 560, 564, 570, 599, 603  
Balasubrahmanyam, Vriddhachalam K. 308, 407–408, 720–735, 792–795, 798, 881–885, 889–890  
Ball, P. 703  
Ballmer, Thomas T. 414  
Balschun, Claudia 799  
Bamberger, Richard 914, 916  
Ban, Nobutomo 83, 93  
Bandelt, H.-J. 642, 644  
Bangalore, S. 813  
Bank, D. 391  
Barabasi, Albert-László 732  
Bar-Hillel, Yehoshua 858  
Barnes, Jonathan 277  
Bartens, Hans-Hermann 270, 799  
Bartkowiakowa, Anna 121, 158, 174–177, 262  
Barwise, Jon 327  
Barz, Irmhild 228, 235  
Basili, Roberto 274  
Bateman, R. 634  
Bates, Elizabeth 892, 998  
Bates, M. 901  
Baudouin de Courtenay, Jan 25, 53, 58, 122  
Bauer, Hans-Joachim 156  
Bauer, Laurie 227–228, 589–590  
Bauer, Roland 514, 534  
Baum, Leonard E. 293, 815  
Baumann Manfred 912–914  
Bavaud, François 741  
Bayer, Josef 894  
Beale, A. D. 810  
Beaugrande, Robert-Alain de 328–329, 432  
Beauvois, Margaret H. 901

- Bechtereva, Natal'ja P. 999  
 Bečka, J. V. 131  
 Bee, R. E. 394  
 Behaghel, Otto 280  
 Behnke, Kay 700, 703  
 Behrens, D. 620  
 Bei, Guiqin 99  
 Beier, E. 317  
 Bekiari, Xara 136  
 Bektaev, Kaldybay B. 155, 169,  
 261–262, 314, 317, 321, 751,  
 859, 868, 870–871  
 Bell, Alan 555–556  
 Belousova, E. A. 69  
 Belyj, Andrej 25, 53, 58, 122,  
 127  
 Bem, Al'fred L. 41  
 Bender, Marvin L. 637–638  
 Beneš, Eduard 432  
 Benešova, Eva 431, 433  
 Bengtson, Manlin 799  
 Bennett, C. H. 722, 883  
 Bennett, Paul E. 374, 379  
 Bense, Max 325  
 Benson, D. Frank 893  
 Bentivoglio, Paola 477, 480  
 Bentley, M. 149  
 Benwell, Anita 903  
 Benzécri, F. 498  
 Benzécri, J.-P. 498  
 Beóthy, Erzsébeth 122, 233, 307,  
 309, 460, 646, 764, 801  
 Berck, Peter 829  
 Berend, Nina 533  
 Bergenholtz, Henning 233  
 Berger, Adam L. 811, 815–816,  
 875  
 Berko-Gleason, Jean 895  
 Bernstein J. 932  
 Bertalanffy, Ludwig von 760  
 Bertram, Raymond 250, 252–  
 253  
 Berwick, Robert C. 821  
 Bepal'ko, Vladimir P. 916  
 Best, Karl-Heinz 20, 126, 155,  
 210–212, 227–228, 232–  
 235, 256–259, 261, 264–271,  
 307–309, 426, 460, 628, 632,  
 646, 655–656, 730, 764,  
 797–801, 955, 959–960  
 Biber, Douglas 487–489  
 Bickel, Balthasar 560, 576, 578  
 Billmeier, Günther 16, 18, 781,  
 1003  
 Binongo, J. N. G. 388–389  
 Binovic, Leonid E. 468  
 Bird, Norman 639  
 Birkhan, Helmut 142–144, 150  
 Birkmann, Peter 787  
 Birnbaum, Henrik 181  
 Birner, Betty 474  
 Bjork, Robert, A. 251  
 Bjørn, Else 913  
 Björnsson, C. H. 914  
 Black, Ezra 296, 828, 852  
 Black, Paul 551, 637, 642–643  
 Blanken, Gerhard 988  
 Bleser, Ria de 894  
 Bleuler, Eugen 995  
 Block, Ulrich 817  
 Bloomfield, Leonard 712, 825  
 Bluhme, Hermann 378  
 Blumstein, Sheila 893  
 Bobrik, A. A. 40–42  
 Bobrov, Sergej P. 31–33, 35  
 Bock, Hans Hermann 498, 511,  
 513, 536, 544, 584  
 Bod, Rens 292, 297, 827, 854–  
 855  
 Bogdanova, P. 317  
 Bogodist, Valentin I. 865, 870,  
 901  
 Bogorodickij, Vasilij A. 25–27,  
 44, 53  
 Boguslawskaja, Galina P. 869,  
 901  
 Bohm, David 890  
 Bohn, Hartmut 301, 957, 961,  
 963–966  
 Bohr, Kurt 777  
 Bokučava, N. V. 169–170  
 Bolling, George M. 371  
 Boltzmann, Ludwig 727, 878–  
 880, 882, 885–886  
 Bond, Carroll L. 914  
 Bondesson, Lennart 795  
 Boonj, Geert E. 249  
 Bookstein, Abraham 731  
 Booth, Taylor L. 292  
 Boots, Barry 503, 545  
 Boretzky, Norbert 647  
 Bormuth, John R. 910, 914  
 Boroda, Moisei G. 194, 327,  
 332, 336  
 Bortolini, Umberta 317, 924  
 Bosch, Robert A. 726  
 Boström, Henrik 829  
 Botel, Morton 912–913  
 Botinis, Antonis 136  
 Bourdon, Benjamin 3  
 Bourigault, Didier 973  
 Boutsis Sotiris 138–139  
 Bower, Gordon H. 898  
 Bowker, Albert H. 198  
 Bowker, Lynne 972  
 Bowman, Kelsey O. 798  
 Box, G. 390, 740, 742–743  
 Bradford, Samuel Clement 731  
 Brainerd, Barron 326–327, 334,  
 364, 372–373, 380, 740, 797  
 Brandt, Per Aage 418, 702  
 Bransford, John D. 913  
 Brants, Thorsten 3  
 Bratley, Paul 390, 744  
 Breiman, Leo 809, 828  
 Breiter, Maria A. 959–960  
 Breland, H. M. 314  
 Brennenstuhl, Waltraud 414  
 Brent, Michael R. 821, 902  
 Brew, Chris 296  
 Bridle, John 934  
 Brill, Eric 822, 972  
 Brink, Daniel 902  
 Brinker, Klaus 325  
 Briscoe, Ted 296, 848  
 Brockwell, Peter 741  
 Broeder, Peter 821  
 Browman, Catherine 700  
 Brown, C. B. 316  
 Brown, J. A. C. 730–731  
 Brown, Jason 893  
 Brown, Keith 275  
 Brown, Peter F. 808, 812–816,  
 859, 927, 979  
 Bruce, Bertram 914  
 Brunet, Etienne 317, 365, 389,  
 981  
 Brunot, Ferdinand 624  
 Brun-Trigaud, Guylaine 511  
 Brynjólfsson, Einar 271  
 Buck, Carl D. 638  
 Buckingham, Brian 892  
 Buckley, Chris 976  
 Budagov, Ruben A. 68  
 Budilovič, Anton S. 24–25  
 Bühler, Karl 13, 426, 764  
 Bułczyńska, Katarzyna 122, 317  
 Bunge, Mario 9, 13, 256, 274,  
 276, 306, 650, 761, 791–792  
 Bunjakovskij, Viktor I. 3, 24  
 Burdinski, Violetta 286, 338,  
 797–798, 800  
 Burgess, Curt 344  
 Burns, Martha 893  
 Burrows, J. F. 378, 388–389,  
 392  
 Burwick, Frederick L. 372, 380  
 Busacker, Robert G. 442  
 Busch, Andrea 301  
 Busemann, Adolf 371, 376–377  
 Bußmann, Hadumod, 228, 778  
 Buttlar, Haro von 282, 309, 372,  
 627–628, 639  
 Button, C. 901  
 Bybee, Joan L. 239, 569, 588–  
 589, 594–595  
 Byčkov, Valerij N. 901  
 Bystrova, L. V. 466–469  
  
 C  
 Čada, F. 371  
 Campbell, D. 394  
 Campbell, Lyle 555, 566  
 Canter, D. 394  
 Canter, Gerald 893  
 Cantor, Georg 698, 701  
 Čáp, J. 133

- Caplan, David 891–892  
 Caramazza, Alfonso 892  
 Carayannis, George 137, 139  
 Cardebat, Dominique 895  
 Cardie, Claire 822–823, 826  
 Carnegie, Dale 913  
 Carroll, John 297  
 Carpenter, Bob 848, 871  
 Carpenter, Patricia A. 913  
 Carroll, Glenn 296  
 Carroll, John B. 182, 314–317, 321, 371, 378–380, 400, 848  
 Carson D. H. 869  
 Carstairs, Andrew 581, 587, 589  
 Carstensen, F. V. 810  
 Carter, C. W. 314, 317  
 Cartwright, Timothy 821  
 Casacuberta, Francisco 813, 875  
 Castets, F. 511  
 Caussin, Henri 199  
 Čebanov, Sergej G. 155, 158–159, 261–262, 269, 797  
 Čebanov, Sergej V. 261  
 Čejka, Mirek 133  
 Ceplite, B. 916  
 Cercvadze, G. N. 70, 168–170  
 Čerepanov, Vjačeslav S. 909  
 Černyševskij, Nikolaj G. 48  
 Chafe, Wallace L. 471, 476  
 Chaitin, Gregory J. 727, 882  
 Chajdarov, Š. 314  
 Chall, Jeanne S. 909–910, 912–915  
 Chamberlain, Julia 914  
 Chandler, Steve 709–710  
 Chandler, Zilpha E. 371  
 Chandon, Jean-Louis 498  
 Chang, Baoru 99, 962  
 Chang, Hsin Yuan 98–99  
 Chang, Lili 106  
 Chang, Ming-Chung 110  
 Chang-Rodriguez, Eugenio 924  
 Chantraine, Yves 895  
 Chao, Yuen Ren 149  
 Charakoz, P. I. 316  
 Charalambides, Charalambos 652  
 Charniak, Eugene 294–296, 822–854  
 Chatfield, C. 388, 390  
 Chavkin, Laura 912  
 Chen, Heqin 97–98, 100, 104  
 Chen, Keh-Jiann 106, 110  
 Chen, Mingyuan 955–956  
 Chen, Stanley F. 295  
 Chen, Yuan 99, 101  
 Cherc, Maja M. 4, 149, 309, 639  
 Cherubim, Dieter 233, 461  
 Chevrie-Muller, C. 988  
 Cheydeur, F. D. 316–317  
 Chi, Zhiyi 293, 859, 875  
 Chiarello, Christine 895  
 Chiou, Fu-Dong 112  
 Chiplonkar, V. N. 722  
 Chitashvili, Revaz Ja. 308, 399–400, 652, 792, 795, 798, 800, 945  
 Chomsky, Noam 12, 276, 294, 325, 469, 740, 779, 781–782, 788, 809, 847, 893, 922  
 Chrétien, C. D. 308  
 Christmann, Hans Helmut 509  
 Chu-Carrol, Jennifer 871  
 Chun, Dorothy M. 913  
 Church, Kenneth 407, 810, 813–814, 822, 972, 979, 981  
 Churchhouse, R. F. 372  
 Chute, Christopher G. 827  
 Čikodze, G. B. 70  
 Čikoidze, G. B. 168–170  
 Cilosani, T. P. 169–171, 262, 797  
 Čistjakov, Vasilij F. 53–56  
 Čistovič, L. A. 70  
 Čizakovskij, Valentin A. (Czyżakowski, W.) 65, 317, 929, 992  
 Clariana, Roy B. 914  
 Classe, A. 149  
 Clausius, Rudolf 878  
 Clayman, Dee Lesser 300  
 Clearwater, Scott H. 714  
 Cobb, S. 993  
 Cocke, John 812, 816, 927  
 Cohen, Jonathan 197, 981  
 Cohen, Marcel 146, 149, 620  
 Cohen, William W. 822, 829  
 Colin, B. 317,  
 Collins, A. J. 388  
 Collins, Michael J. 296, 853  
 Colussi, C. 609  
 Comrie, Bernard 492, 566, 578, 600–601  
 Conard, Sue S. 912  
 Condamines, Anne 980  
 Condon, Edward U. 3, 962  
 Conklin, Harold C. 196  
 Consul, Prem C. 179  
 Contreras, Alfonso 915  
 Contreras, Heles 480  
 Cook, W. A. 317  
 Cooley, Robert 344  
 Cooper, David L. 702  
 Cooreman, Ann 477, 480, 483  
 Corbett, A. 391  
 Corduas, Marcella 747  
 Corns, T. N. 389, 902  
 Coseriu, Eugenio 426  
 Cossette, A. 389–390  
 Cost, Scott 825  
 Cover, Thomas M. 825, 858–859  
 Cramer, Irene M. 686–687  
 Cranius, Lambios 138–139  
 Crisholm, D. H. 378  
 Crisp, Jenni 894–895  
 Croft, William 12, 561, 565, 569, 579–580, 599, 601  
 Crothers, Edward J. 898  
 Crow, Edwin L. 731  
 Crozier 142–143, 149  
 Cryer, Jonathan 741–742  
 Crystal, David 718  
 Csányi, Vilmos 656  
 Csonka, S. 314, 317  
 Čudovskij, Valerian 29–31, 34  
 Culley, G. 903  
 Cunningham, Hamish 772  
 Cussens, James 829  
 Cutler, Anne 252, 595, 604  
 Cysouw, Michael 278, 558–559, 561–562, 564–565, 567–568, 570, 574–575  
 Czyżakowski, W. (Čizakovskij, Valentin A.) 65, 317, 929, 992
- ## D
- Dacey, Michael F. 799  
 Daelemans, Walter 253, 705, 710, 712–714, 821–823, 826, 827, 829, 830, 932, 934  
 Dagan, Ido 813–814, 827, 928  
 Dahl, H. 313, 317  
 Dahl, Osten 492–494, 589–591  
 Daille, Béatrice 973, 978–980  
 Dalakakis, Jenny 138  
 Dale, Edgar 910, 914–945  
 Dale, Philip S. 988  
 Dalsgaard, Paul 934  
 Dalton-Puffer, Christiane 247  
 Damerau, F. J. 388, 812, 980, 981  
 Damper, Robert 934  
 Danejko, Marija V. 927  
 Daneš, František 432  
 Danforth, D. G. 642  
 Dannhauer, Heinz-Martin 343  
 Darčeva, I. 317  
 Darmesteter, A. 620  
 Dautat, Albert 620  
 Davies, J. 989  
 Davies, Paul 636–637, 639, 642, 887  
 Davies, Peter 314–317, 321, 899  
 Davies, Richard 741  
 Davis, Monte 692  
 Davison, Alice 913  
 Davison, Mark L. 549  
 de Beaugrande, Robert 328–329, 432  
 de Bleser, Ria 894  
 De Gooijer, J. G. 391  
 De Haan, Petr 390, 394, 748  
 De Jong, Nivja H. 252–253  
 de Marcken, Carl 296  
 de Paiva Alves, Eduardo 274

de Souza, Peter V. 815  
 Dedina, Michael J. 933  
 DeFrancis, John 97, 947–948, 959  
 Delatte, L. 317  
 Della Pietra, Stephen A. 808, 811–815, 859, 862, 875, 829  
 Della Pietra, Vincent J. 808, 811–815, 859, 862, 875, 829  
 Demiros, Iason 139  
 Dempster, Arthur P. 293  
 Denisov, Ja. 40  
 Denisov, Pjotr N. 314, 916  
 Dennis, Sally F. 976  
 Dermatas, Evangelos 138, 933–934  
 DeRose, Steven J. 808, 810, 972  
 Derouault, Anne-Marie 972  
 Derwing, Bruce 709  
 deSouza, P. V. 815  
 Dessau, H. 391–392  
 Dewey, Godfrey 83, 314, 717, 725–726, 729, 881, 885  
 Diakogiorgi, Kleopatra 138  
 Dice, Lee R. 979  
 Dickinson, G. C. 503  
 Dieckmann, Sandra 653  
 Diederich, P. B. 314  
 Dierse, U. 775  
 Dietze, Joachim 314  
 Diez, Friedrich 614  
 Dijkstra, Ton 253  
 Dik, Simon C. 277  
 Dikarev, Mitrofan A. 24  
 Diller, H. J. 332, 741  
 Dillon, Martin 740  
 Dittenberger, Wilhelm 371  
 Dittmann, Jürgen 739, 988  
 Dittrich, Heike 646, 799  
 Dobrin, David N. 902  
 Dobrušin, Roland L. 70, 73  
 Dodd, S. C. 149  
 Doerfer, Gerhard 635  
 Dolan, W. D. 813  
 Dolby, Julian A. 726, 730  
 Doležel, Lubomír 131, 371–372, 1003  
 Dolinskij, V. A. 327  
 Dorothy, Leal 914  
 Douglas, S. 710, 813  
 Draffan, J. 989  
 Draskau, Jennifer 972  
 Drebet, V. V. 460–463  
 Dreher, John J. 747  
 Dressher, Elan 821  
 Dressler, Wolfgang 12, 328–329, 596, 787, 895  
 Dretzke, Burkhard 274  
 Dreyfus Hubert L. 922  
 Dridse, T. M. 466  
 Drobisch M. V. 3  
 Droesbeke, Jean-Jacques 741  
 Drozen, Vladimir 871

Dryer, Matthew S. 275, 278, 483, 489–491, 555–558, 565–566, 570–573, 578, 599–602, 604  
 Duan, Huiming 106, 108  
 Dubois (Sylvius) 620  
 Dubois, Jean 248  
 Dubovská, Zorica 191  
 Duda, R. O. 809, 810  
 Duffy, Tomas M. 914  
 Dugast, Daniel 120, 364  
 Dumais, Susan T. 342, 344  
 Dunning, Ted 979  
 Durand, Joseph-Pierre 504  
 Durieux, Gert 705, 710, 712–713, 821  
 Dušková, Libuše 377  
 Dyen, I. 637, 642–643  
 Dyrcheeva, G. A. 317  
 Dzeroski, Saso 822, 829

## E

Earley, Jay 848–849  
 Eaton, Helen S. 900  
 Ebeling, Werner 696  
 Echenique, Marta 915  
 Echols, John E. 193  
 Eckenhoff, Marion 912  
 Eddington, David 710  
 Eder, Maciej 714, 742, 746–747  
 Edwards, P. N. H. 314–315, 317  
 Eesmaa, Vilma 912  
 Efimova, E. N. 793, 795  
 Efron, B. 387, 391, 399, 719, 721, 808  
 Egawa, Kiyoshi 92  
 Egbers, Jannetje 799  
 Eggers, Hans 17  
 Eigen, Manfred 761  
 Eikmeyer, Hans-Jürgen 892  
 Eimermacher, Karl 65, 75  
 Eisner, Jason 296  
 Ejiri, Koichi 364, 366  
 El-Béze, Marc 972  
 Eldridge, R. C. 317, 717, 719–720  
 Eliseeva, L. A. 314  
 Ellegård, Alvar 275, 281, 282, 373  
 Ellis, Andrew 379, 893  
 Elman, Jeff 821  
 Elts, Jaanus 343, 912, 914–915  
 Embleton, Sheila M. 308–309, 551–552, 641  
 Emeis, Marinus G. 196  
 Empson, William 146  
 Engel, R. 817  
 Enguehard, Chantal 982, 984  
 Engwall, Gunnel 372, 380  
 Enkvist, Nils E. 370, 376, 379  
 Epstein, M. 812

Erat, Erkan 650, 801  
 Erdős, Paul 734  
 Erenstein, Marina C. 898  
 Erjavec, Tomaz 829  
 Erlich, Viktor 27  
 Ermilova, Elena 75–76  
 Ermolenko, Georgij V. 25, 65, 372  
 Estoup, Jean-Baptiste 3, 123, 717, 793, 798, 962  
 Ettmayer, Karl von 510  
 Everitt, Brian S. 197, 643  
 Evert, Stefan 401

## F

Fakotakis, Nikos 932  
 Fallon, Paul 137  
 Fan, Keyu 99  
 Fang, Shizeng 952  
 Farrington, J. M. 394  
 Farrington, Brian 903  
 Faulseit, Dieter 912  
 Fei, Jinchang 99  
 Felber, Helmut 972  
 Feldt, Sabine 264–265  
 Fellbaum, Christiane 238, 906  
 Feller, William 557, 653  
 Felsenstein, Joseph 563  
 Feng, Zhiwei 99, 103, 108, 961–963  
 Fenk, August 554, 559, 562, 569, 578, 584, 682, 684–685  
 Fenk-Oczlon, Gertraud 554, 559, 562, 569, 584, 614, 682, 684–685, 793  
 Fermi, Enrico 717, 732, 734  
 Feyereisen, P. 895  
 Fickermann, Ingeborg 460, 668, 686, 794  
 Fillmore, Charles J. 421  
 Fine, Jonathan 994  
 Finegan, Edward 487–489  
 Firbas, Jan 133, 432, 600  
 Fischer, Michael J. 985  
 Fischer, R. 988, 999–1000  
 Fischer, Susan 275  
 Fischer, Walther L. 325  
 Fisher, R. 391, 566, 570–573, 994  
 Fix, E. 825  
 Flämig, Walter 233–234  
 Fleary, F. G. 370  
 Fleischer, Wolfgang 228  
 Fleiss, J. L. 197  
 Fleming, Malcolm L. 913  
 Flenner, Gudrun 227  
 Flesch, Rudolph F. 378, 910, 912, 914–916  
 Fletcher, James V. 371  
 Fletcher, Paul 988  
 Flohr, Horst 227

- Fónagy, Ivan 794  
 Forrest, Linda B. 477  
 Förstemann, Ernst 3, 24  
 Forster, P. 642  
 Forsyth, R. S. 389, 393  
 Fortier, Gilles 914  
 Fortunatov, Filipp 27, 53, 56, 58, 70  
 Foster, George F. 972  
 Fourakis, Marios 137  
 Fox, Andrex 477, 480  
 Francis, W. N. 314–317, 319, 373, 460  
 Frank, L. 371  
 Frantzi, Katarina 183, 982  
 Franz, Alex M. 851  
 Freeman, W. J. 361, 417  
 French, N. R. 314, 317  
 Friedman, Jerome H. 809, 828  
 Friedman, N. 893  
 Frischer, Bernard D. 274, 280, 388, 302  
 Frumkin, Vladimir A. 875  
 Frumkina, Revekka M. 5, 23, 59, 70, 71, 74, 286, 321, 795  
 Fry, Edward B. 912, 914  
 Frynta, D. 642  
 Fu, Yonghe 99, 104  
 Fucks, Wilhelm 17–18, 152–180, 209, 256, 261, 299, 325, 339–340, 371, 373, 797–798, 859, 874  
 Fujii, Atsushi 827  
 Furigori, Teiji → Furugori  
 Furnival, F. J. 371  
 Furugori, Teiji 274, 343  
 Furui, Sadaoki 923
- G**
- Gačečiladze, T. G. 70, 158, 168–174, 177–178, 262, 779  
 Gaeta, Livio 652  
 Gagatsis, Athanassios 183  
 Games, Helen F. 721  
 Gaizauskas, Rob G. 772  
 Gajdaj, Nadežda 903  
 Gajic, Dragomir M. 670  
 Gal', Nora Ya. 912–913  
 Gale, William 407, 813–814, 979  
 Galulin, Kamil' R. 902  
 Gallacher, Richard 841  
 Galle, Matthias, 334, 362  
 Galperin, Ilja R. 381  
 Gamble, W. 317  
 Gani, John 364, 367  
 Ganter, Bernhard 538  
 Gao, Jiaying 99  
 Garbe, Burckhard 257  
 García, Erica 146, 149–150  
 Garcia-Alonso, Rafael 915  
 Garcia-Varea, Ismael 815, 875  
 Gardner, Howard 895  
 Garside, Roger 852, 972  
 Gärtner, Hans-Martin 779, 782  
 Gašpariková, Š. 314, 317  
 Gasparov, Michail L. 77  
 Gasser, Michael 477  
 Gaston, L. 317  
 Gaussier, Éric 973, 980  
 Gavriilidou, Maria 137  
 Gazdar, Gerald 821  
 Geens, Dirk 375  
 Geiling, Ute 912–914  
 Gell-Mann, Murray 149, 717, 735, 878, 883–886  
 Geman, Stuart 293  
 Gembiak, Danuta 126  
 Genkel', M. A. 314, 317  
 Geoffroy, A. 381  
 Georgakopoulou, Alexandra 137  
 Georgantopoulos, Byron 139  
 Georgiev, Christo (Hristo) 870  
 Georgountzou, Anastasia 136  
 Gerd, Aleksandr S. 69, 73  
 Gerlach, Rainer 224, 238, 255, 668, 671–672  
 German-Prozorova, Lucija P. 899–901  
 Gerola, B. 609  
 Geršić, Slavko 646, 667–669, 793–794, 796  
 Gibbs, Josiah W. 878, 880, 885, 895  
 Gibbs, Raymond 410, 412, 878, 880, 885, 895  
 Gibson, Walker 380  
 Gieseking, Kathrin 274  
 Giles, H. 703  
 Gillie, Paul J. 912  
 Gillieron, Jules 513  
 Gillis, Steven 705, 710, 712–713, 821, 829  
 Gilmore, Robert 689  
 Gindin, S. I. 461  
 Ginka, B. I. 466–468  
 Ginneken, Jacobus v. 194  
 Giraud, Raymond 872–873  
 Givón, Talmy 472–473, 478, 480–482, 486–487, 494, 560, 603  
 Gjurova, M. 317  
 Glass, Gene V. 741, 751  
 Gleason, Henry A., Jr. 642  
 Gleichgewicht, Bolesław 121, 158, 174–177, 262  
 Glinz, Hans 445  
 Goddard, I. 634  
 Goebel, Hans 21, 191, 195, 199, 201, 204, 308, 499–504, 506, 509–512, 532–534, 536, 544  
 Goel, Narendra S. 628  
 Gołąb, Zbigniew 624–625  
 Gold, Bernard 837  
 Goldberg, David 825  
 Goldenberg, D. 871  
 Goldstein, Lois 700  
 Golovin, Boris N. 76, 371–372, 377  
 Good, Irving John 120, 391, 399, 654, 722, 725, 796  
 Goodglass, Harold 895  
 Goodman, Joshua 296, 850–851  
 Goodman, L. A. 751  
 Gooijer, J. G. De 391  
 Gordesch, Johannes 274  
 Gordon, Peter 253  
 Gorin, Allen L. 808, 842  
 Gornfel'd, Arkadij 33–34  
 Gornung, Boris V. 68  
 Gorot', E. I. 255  
 Gottman, John M. 741  
 Gougenheim, Georges 313, 447, 899, 901  
 Graben, Peter Beim 726  
 Graf, Dittmar 912, 915–916  
 Granowsky, Alvin 912–913  
 Grassegger, Hans 217, 219, 221  
 Graumann, Lore 913  
 Gray, R. D. 642  
 Gray, William S. 909, 910  
 Green, Georgia M. 913  
 Greenberg, Joseph H. 7, 12, 181–182, 191, 216, 219–220, 227, 229, 257, 261, 275, 278, 280, 369, 512, 554, 559, 564–566, 569, 580–584, 586, 589–590, 594, 598–600, 638, 739, 752, 758–759  
 Greimas, Algirdas Julien 425, 702  
 Grenander, Ulf 862  
 Grice, H. Paul 471, 479, 781, 784, 788  
 Gries, Stefan T. 274, 280  
 Grigor'ev, Vladimir I. 69, 75  
 Grigorjan, Vladimir M. 74  
 Grimm, Hannelore 988  
 Grimm, Jakob 509, 702  
 Grinbaum, O. N. 317  
 Grišin, Nikolaj N. 468  
 Grodzinsky, Yosif 893  
 Groeben, Norbert 261, 912, 916  
 Groen, Claudia 799  
 Groner, G. 932  
 Gropp, Friedrich 210  
 Gross, Philip P. 914  
 Grosse, Ernst U. 424  
 Grosse, Rudolf 92  
 Grotjahn, Rüdiger 7, 20, 155, 164, 166, 209, 232, 256, 262, 265–270, 299–300, 306, 326, 331, 333–334, 339, 378, 652, 740–741, 792, 797–798, 800–801  
 Grousouzakou, Dimitra 136  
 Grousouzakou, Efrosini 136

- Gruszczynski, Włodzimierz 118  
 Grzybek, Peter 22, 24, 27, 38,  
 48, 54, 75, 159, 178, 213,  
 303, 794  
 Guilhaumou, J. 381  
 Guiraud, H. 389, 395  
 Guiraud, Pierre 15, 18, 70, 120,  
 364–365, 369, 371, 373, 375,  
 405, 461, 739, 1003  
 Guiter, Henri 308, 321, 509–  
 510, 652, 781, 795  
 Gulikers, Leon 243  
 Gulp 914  
 Gundel, Jeanette K. 474–476,  
 478–480, 495  
 Guntern, Gottlieb 648  
 Gunzenhäuser, Rul 18, 372  
 Guo, Jin 112  
 Guo, Shulun 106  
 Guo, Yefang 103  
 Gurland, John 797  
 Gurney, L. W. 389, 392  
 Gurney, P. J. 389, 392  
 Gusein-Zade, S. M. 194, 652,  
 654, 796  
 Guthrie, D. 392  
 Guthrie, Louise M. 928
- H**
- Haag, Carl 503, 509–510, 544  
 Haag, Karl 510  
 Haan, Petr De 390, 394, 748  
 Habert, Benoît 973  
 Haeb-Umbach, R. 808  
 Haight, Frank A. 364, 651, 800  
 Haimerl, Edgar 511, 514, 534  
 Haipus, M. 313, 317  
 Hajek, John 559  
 Hajičová, Eva 431, 433  
 Haken, Hermann 413, 689, 700,  
 761  
 Halliday, Michael A. K. 326,  
 328–329, 332, 342, 356, 379,  
 913  
 Halstead, M. H. 364, 376  
 Hamby, Suzanne 895  
 Hamill, Karen A. 925–926  
 Hammerl, Rolf 20, 115, 124–  
 125, 238, 265, 308, 448–452,  
 456, 793  
 Händler, Harald 509, 535  
 Hanks, Patrick 979, 981  
 Hanley, M. L. 214  
 Hänninen, Ritva 893  
 Hansen, Anya V. 934  
 Hansen-Löve, Aage 27  
 Hantrais, L. 364, 376  
 Harary, Frank 184–185  
 Hardcastle, R. A. 394  
 Harkin, D. 317  
 Harman, Donna 984  
 Harris, Zelig S. 222, 227, 379,  
 857  
 Hart, Peter E. 809–810, 825  
 Harter, Stephen P. 977  
 Hartley, A. 381  
 Hartley, James 913  
 Haruno, Masahiko 828  
 Harvey, Virginia S. 912  
 Harwood, F. W. 250  
 Hasan, Ruqaiya 332, 342, 356,  
 913  
 Haspelmath, Martin 557, 559–  
 561, 573  
 Hass, W. 317  
 Hassler-Göransson, Carita 372,  
 379  
 Hatano, Kanji 85  
 Hatzfeld, A. 620  
 Hatzigeorgiu, Nikos 139  
 Hatzisavidis, Sofronis 138  
 Hatzivassiloglou, Vasileios 927,  
 979  
 Hauch, E. F. 317  
 Haudricourt, André 620  
 Hawkins, John A. 275, 278–  
 281, 288, 555, 558, 565, 569,  
 589, 595, 599–600, 604–605,  
 771  
 Hawks, John 137  
 Hay, Jennifer B. 250–252  
 Hay, Richard A. 741  
 Hayashi, Chikio 941–943  
 Hayashi, Ooki 93, 937, 939  
 Hayes, Curtis W. 377  
 Hearst, Marti, A. 985  
 Hedberg, Nancy 474–476, 478–  
 480, 495  
 Heeschen, Claus 894  
 Hegarty, Mary 913  
 Heimer, Klaus 916  
 Heinemann, Wolfgang 423–425,  
 432  
 Helbich, Jan 373  
 Helenius, Päivi 892  
 Heller, G. Z. 402  
 Hempel, Carl Gustav 8, 579,  
 662, 764  
 Henry, Georges 914  
 Herdan, Gustav 4, 18, 120, 191,  
 262–263, 321, 336–337,  
 339–340, 357, 364–365, 369,  
 371–376, 379, 406, 433, 717,  
 719, 730, 739–740, 793, 796,  
 800, 862, 989  
 Hermann, Eduard 144  
 Hermjakob, Ulf 827  
 Herringa, Wilbert 533–534, 543  
 Herzel, Hanspeter 700  
 Heups, Gabriela 668, 672, 674–  
 675, 793  
 Hewitt, Magaret 314  
 Hewstone, M. 703  
 Hildreth, Carson 371  
 Hilton, M. L. 394  
 Hinch, Xieyan 948  
 Hindle, Donald 851  
 Hinds, John 479  
 Hinton, Geoffrey 892  
 Hjelmlev, Louis 276, 349, 425–  
 426, 869, 922, 989  
 Hochberg, Judith. 933  
 Hockett, Charles F. 224  
 Hodges, J. L. 825  
 Hoenigswald, H. M. 641  
 Hoffman, Ralf E. 604, 988, 994  
 Hoffmann, Christiane 274, 280,  
 1003  
 Hoffmann, Lothar 21, 315, 989  
 Hofland, K. 317, 924  
 Hofmann, Thomas R. 479  
 Höhle, Tilman N. 228  
 Holland, V. M. 901  
 Holm, Hans J. 639, 643–644  
 Holm, Soren 913  
 Holmes D. L. 916  
 Holmes, D. I. 387, 389, 392–394  
 Holstein, Arthur P. 374  
 Homan, Susan 914  
 Honavar, Vasant 821  
 Hoover, David 405  
 Hopper, Paul J. 472, 481, 486  
 Hörmann, Hans 912  
 Horn, E. 314–315  
 Hornby A. S. 752  
 Horne, Kibbey M. 580  
 Horning, James J. 295  
 Horvath, William J. 651  
 Houghton, Harvey A. 913  
 Howes, D. 317, 320  
 Hrabec, Stefan 624  
 Hřebíček, Luděk 133, 255, 325,  
 227, 300–334, 338–339, 342,  
 345, 351–353, 355, 358, 372,  
 423, 425, 432, 434, 650–652,  
 666, 668, 677–678, 730, 748,  
 792–793, 801  
 Hu, Baihua 110–111  
 Huang, Changning 106, 108,  
 951, 962  
 Huang, Chu-Ren 106  
 Huang, Kerson 882  
 Huber, Walter 894  
 Hubert, Pierre 248, 404  
 Hudgins, Clarence V. 149  
 Hudson, Richard 137  
 Huffman, David A. 727, 879  
 Hug, Marc 195, 274–275, 373  
 Hugdahl, Kenneth 892  
 Hummel, L. 535  
 Hunnicut, Sheri 932  
 Hunt, Earl B. 827  
 Hutchins, John W. 71  
 Hutton, P. 932  
 Hymes, Dell H. 378

## I

Ikehara, Narao 89  
 Ikehara, Satoru 941  
 Imbs, Paul 924  
 Imiołczyk, Janusz 126  
 Imsiepen, Ulrike 628, 630–631  
 Ineichen, Gustav 582, 584  
 Ingber, E. 932  
 Ingram, J. K. 370  
 Inoue, Fumio 92  
 Inui, Kentaro 827  
 Iordanidou, Anna 137  
 Isenberg, Horst 424  
 Ishii, Masahiko 944  
 Ising, Gerhard 785  
 Isomoto, Masao 940  
 Itai, Alon 928  
 Ito, Masamitsu 86, 91–92  
 Ivanjuk, V. J. 468  
 Ivanov, Vjačeslav Vs. 56, 59,  
 68–70, 72–73, 75–76

## J

Jachnow, Helmut 65  
 Jachontov, Konstantin S. 752  
 Jachontov, Sergej E. 582, 752  
 Jaeger, Jeri J. 710  
 Jaglom, Akiva M. 70, 74, 859–  
 860  
 Jaglom, Isaak M. 70, 74, 859–  
 860  
 Jakobson, Roman O. 26, 58, 60,  
 73, 130, 599, 740, 744  
 Jakovlev, Nikolaj F. 58–59  
 Jakubajtis, T. A. 376  
 Jakubovskaja, M. D. 460  
 Janssen, Marianne 264–265  
 Januszkiewicz, Natalia A. 454  
 Jassem, Wiktor 115–117, 126  
 Jelinek, Frederick 131, 828,  
 839–842, 849, 852  
 Jenkins, Gwilym M. 390, 740,  
 742–743  
 Jenkins, J. J. 651  
 Jenkins, L. 314  
 Jeong, H. 732  
 Jespersen, Otto 308, 778–779,  
 785–788  
 Jewell, William S. 652  
 Ji, Ming 963  
 Jie, Chunyu 114  
 Jin, Guangjin 106  
 Jin, Ming-Zhe 91, 106  
 Jing, Zhuo 300–301  
 Joannette, Yves 893–895  
 Job, Ulrike 763, 795  
 Johansen, Jorgen Dines 922  
 Johansson, S. 317, 924  
 Johnson, D. 812  
 Johnson, Marcia K. 913

Johnson, Norman L. 652, 654,  
 793–794, 797–800  
 Johnstone, A. H. 916  
 Johnstone, Judith R. 988  
 Jones, Alan 372  
 Jones, Daniel 710  
 Jones, Lawrence G 378  
 Jones, R. B. 364  
 Jong, Nivja H. De 252–253  
 Jongman, Allard 137, 253  
 Joos, Martin 127, 146, 962  
 Jost, Karl 146  
 Joyce, T. 798  
 Juang, Biing-Hwang 814  
 Jud, Jakob 512  
 Judt, Birga 653  
 Juilland, Alphonse 122, 314–  
 315, 317  
 Juilland, Ileana 314–315, 317  
 Julkunen, Marja-Liisa 913  
 Jung, Udo O. H. 901  
 Juola, Patrick 589, 593–594  
 Jürgens, Hartmut 698  
 Juritz, J. 402  
 Just, Marcel Adam 913  
 Justeson, John S. 652–663, 569,  
 638

## K

Kabashima, Tadao 85, 89–91  
 Kaeding, Friedrich W. 16, 18,  
 24, 84, 313–314, 730  
 Kagarov, Evgenij 34  
 Kager, René 784  
 Kageura, Kyoo 88, 945, 972–  
 973, 976  
 Kai-hua Zhao 794  
 Kaito, Matsuzoo 85  
 Kajima, Eiichi 937  
 Kalinin, Valentin M. 308, 899  
 Kallmeyer, Werner 425, 433  
 Kaltz, Barbara 233  
 Kambakis-Vougiouklis, P. 138  
 Kamimura, Ryotaru 873–874  
 Kamińska-Szmaj, Irena 122  
 Kamps, George 365, 656  
 Kandler, Günter 227  
 Kaneda Yasumasa 91  
 Kapatruk, M. D. 458  
 Kaplan, J. 901  
 Kaplan, Ronald 854  
 Kapur, Jaget M. 799, 879  
 Karamyševa Tat'jana V. 906  
 Karaulov, J. N. 313  
 Karlgren, Hans 324  
 Karpov, Alexey A. 843  
 Karush, W. 9  
 Kasai Hisako 92  
 Kasami, Tadao 848  
 Käsermann, Marie-Louise 988  
 Kasevič, Vadim B. 582

Kaspar, Ingolf 799  
 Kabel, Anja 211–212, 301  
 Kastenbaum, Marvin A. 798  
 Kašyrina Marianna E. 899  
 Katis, Demetra 138  
 Katz, Leo 797  
 Kaufman, Leonard 544  
 Kaufman, Stuart A. 889  
 Kaumann, Werner 681  
 Kay, Paul 421  
 Kay, Stanley R. 995  
 Kaye, Jonathan 821  
 Kazakov, Dimitar 825  
 Kazarjan, B. K. 314  
 Kean, Mary-Louise 893  
 Kecskés, István J. 901  
 Kedem, Benjamin 390, 747  
 Keenan, Edward 477  
 Keeping, E. S. 722, 731  
 Kehayia, Eva 138  
 Kelih, Emmerich 24, 38, 73, 303  
 Kelle, Bernhard 534  
 Keller, Paul F. G. 914  
 Kelly, Erna 902  
 Kelso, J. A. Scott 413, 700  
 Kemp, Adrienne 652, 654, 797–  
 799  
 Kemp, C. David 654  
 Kempgen, Sebastian 19, 23, 58,  
 66, 182, 184–186, 188, 225  
 Kendall, D. G. 639  
 Kendall, Janet 912  
 Keniston, H. 317  
 Kent, Roland G. 144, 377  
 Kern, Peter 445  
 Kertesz, Andrew 894  
 Kessel, Brett 533  
 Khinchin, Aleksandr I. 880  
 Khmaladze, E. V. 399–400  
 Khmelev, Dimitri V. 740  
 Kibler, Dennis 705, 822  
 Kibrik, Aleksandr E. 69  
 Kiiko, J. J. 461, 463  
 Kijko, S.V. 460–463  
 Kim, Icheon 651, 801  
 Kind, Bernd 228, 233, 308, 448,  
 646  
 King, Robert D. 859  
 Kirsch, Irwin S. 914  
 Kissen, I. A. 315  
 Kita, Kenji 900  
 Kitazato, Takeshi 83  
 Kjetsaa, Geir 369, 372–373,  
 377–378  
 Klappenbach, Ruth 468  
 Klare, George R. 909, 912–916  
 Klatt, Dennis 932  
 Klaviņa, Sarma P. 376  
 Kleiber, Georges 784  
 Klemm, Elmar 642  
 Klenk, Ursula 227  
 Klimov, Georgij A. 569, 587,  
 592–593

- Kluge, Friedrich 625, 775  
 Kneser, Reinhard, 815  
 Knight, K. 813, 816  
 Kniseley, Elisabeth 912  
 Knobloch, Clemens 233  
 Knowles, J. Rev. 317  
 Knüppel, Anke 268  
 Kobayashi, Hideo 85  
 Koehn, Philipp 927  
 Koeling, R. 812  
 Koenig, W. 314, 317  
 Koenraads, Willy Henri August 786  
 Koerner, E. F. K. 580  
 Kogan, Leonid 925, 927  
 Köhler, Reinhard 16, 19–21, 116, 126, 143–144, 149–150, 201, 209, 216, 222–232, 225–227, 229, 232, 235–237, 239, 250–251, 255–256, 261–262, 264–268, 270, 274, 283–286, 288–289, 299–300, 308–310, 321, 326, 328, 330, 334–335, 342, 352, 362, 364, 367, 372, 408, 443, 460–461, 646, 648–649, 652, 668, 672, 674–675, 682, 685–686, 701, 730, 739–740, 761, 764–773, 783, 788, 792–793, 795–801, 874, 929, 965–968, 1003  
 Kohlhase, Jörg 628, 632  
 Kokkinakis, George 932–934  
 Kolguškin, A. N. 317  
 Koliban, Valentin V. 928  
 Kolk, Herman 893–894  
 Koll, Matthew B. 975  
 Köller, Wilhelm 423  
 Kolmogorov, Andrej N. 59, 73–74, 76–77, 261, 717, 722, 727–728, 734, 853, 860–862, 882–883, 962  
 Kolodner, Janet 825  
 Komárek, Miroslav 131  
 Kondrateva, Violetta A. 912, 915  
 Kondratjeva, Julia 927  
 Kondratov, Aleksandr M. 76–77  
 König, G. 776  
 König, Werner 533–534  
 Königová, Marie 133, 379  
 Köpcke, Klaus-Michael 239  
 Kopeckij, Leontij 53–54  
 Kopylenko, M. M. 466  
 Korbut, Gabriel 624  
 Korneev, Lev A. 901  
 Körner, Theodor 427–428, 433–434, 443  
 Korol'ov, E. I. 461  
 Korvasová, Květa 131  
 Korzybski, Alfred 423  
 Kosarev, Yuri A. 843, 845–846, 923, 925  
 Kossuth, K. 391  
 Kotelova, N. Z. 464–465  
 Kotov, R. G. 74  
 Kotz, Samuel 652, 654, 793–794, 797–800  
 Koza, John R. 825  
 Koženec, Tamara 861, 866, 868–869  
 Kozima, Hideki 343  
 Kožina, M. N. 372, 381  
 Krajewski, Marek 746  
 Králík, Jan 132–133, 380  
 Krallmann, Dieter 16, 18, 369, 377, 794  
 Krámský, Jiří 130, 373  
 Kraus, Jiří 133, 371–372, 376–378, 381  
 Krause, W. 913  
 Kravec, L. G. 465  
 Kreifelts, Barbara 18  
 Kreuzer, Helmut 18, 372  
 Krishnamurti, B. 642  
 Kristallinsky, Roman E. 752  
 Kristophson, J. 637  
 Kroch, Anthony S. 281–282  
 Kroeber, A. L. 308, 636–637  
 Kroeber, Karl 378  
 Kromer, Viktor V. 795–796, 859, 868, 874  
 Kronasser, Heinz 458  
 Krott, Andrea 224, 226, 235–238, 252–253, 255, 668, 671–674, 770, 793, 796  
 Krupa, Viktor 191, 196–198, 559, 562, 569, 582, 586, 752  
 Kruskal, Joseph B. 543, 637, 642–643  
 Kruskal, W. H. 751  
 Krylov, Jurij K. 122, 124, 460, 792, 794, 797  
 Krymowski, Yuval 827  
 Kübarsepp, Ivi 915  
 Kubo, Yoshihide 84  
 Kučera, Henry 219, 314–317, 319, 460  
 Kudo, T. 812  
 Kudrjavskij, Dmitrij 25  
 Kühlwein, H. A. W. 146, 149  
 Kühnhold, Ingeburg 236  
 Kuhr, Saskia 799  
 Kukemelk, Hasso 911, 914  
 Kulagina, Ol'ga S. 71–73, 75  
 Kuleisa, Silke 264–265  
 Kulhavy, Raymond W. 913  
 Kulikowski, Casimir 822  
 Kumagai, Yasuo 92  
 Kunickij, V. N. 24  
 Kuno, Susumu 476  
 Kupfer, Helmut 951  
 Küpfmüller, K. 859, 864  
 Kupiec, James 294, 296  
 Kuraszkiewicz, Witold 364  
 Kuraszkiewicz, Władysław 120  
 Kurcz, Ida 119, 122, 314  
 Kutschera, Franz von 8  
 Kuz'min, Leonid. A. 752  
 Kwapisz, Wiesław 897  
 Kwiatkowski, Wladimir 825, 927  
  
 L  
 Laan, N. M. 391  
 Laass, Françoise 650, 797  
 Labbé, Dominique 248, 374, 404  
 Labov, William 308, 472, 484, 558, 702–703  
 Lacik, M. 928  
 Ladd, D. Robert 137  
 Ladefoged, Peter 218, 536, 538  
 Lafferty, John 296, 828, 852, 862  
 Laine, Matti 893  
 Laird, Nan M. 293  
 Lakoff, Robin 479  
 Lambropoulou, Penny 137  
 Landauer, Thomas K. 342, 344  
 Landon, George M. 373  
 Landon, M. 988  
 Langé, Jean-Marc 973, 980  
 Langendoen, D. Terence 784  
 Langer, Hagen 227, 241  
 Langer, Inghard 910, 912–913  
 Langer, Stanislav 871  
 Langer, Stefan 923  
 Langley, Pat 822  
 Lánský, Petr 364, 800  
 Lari, Karim 295  
 Larson, Ray R. 975  
 Lascaratou, Chryssoula 137  
 Lavrac, Nada 822, 829  
 Law, Vivien 233  
 Le, Quan Ha 963  
 Leary, Bernice E. 909–910  
 Lebart, Ludovic 333, 341, 344  
 Lecours, André R. 991–992  
 Lee, Hian Beng 827, 843  
 Leech, Geoffry 852, 903, 972  
 Leed, Jacob 372  
 Lehfeldt, Werner 4, 7, 20–21, 184–185, 188–190, 193–194, 215, 217–220, 229, 306, 430, 498, 554, 559, 562–563, 569, 579, 581–584, 586–587, 604, 649, 752–753  
 Lehmann, Christian 578–579  
 Lehnert, Wendy G. 827, 829  
 Lehrer, Adrienne 458  
 Lehr-Splawiński, Tadeusz 625  
 Leinbach, Jared 821  
 Leisi, Ernst 464, 466  
 Lejkina, Bella M. 993  
 Leng, Yulong 948  
 Leopold, Edda 628, 631–633, 701, 794–795  
 Lepik, Madis 912, 914  
 Leppermann, H. 616

- Lerchner, G. 441  
 Leslau, Wolf 486  
 Lesochin, Michail 870–871, 873  
 Lesser, Ruth 895  
 Lesskis, G. A. 369  
 Leutner, Detlev 913  
 Levelt, Willem J. M. 858  
 Levi, Judith N. 417–418  
 Levickij, Viktor V. 119, 122, 314  
 Levie, W. Howard 913  
 Levin, E. 808  
 Levin, Joel 913  
 Levin, Jurij I. 740–741  
 Levinson, Stephen C. 840, 894  
 Levison, Michael 370  
 Lewicki, Andrzej 119, 122, 314  
 Li, Juanzi 108, 962  
 Li, Wentian 726–727, 795–796  
 Li, Xingde 110–111  
 Li, Xingjian 952  
 Liang, Nanyuan 102, 104, 949, 952  
 Lichtblau, K. 776  
 Lieber, G. 231, 237  
 Liebovitch, Larry S. 735  
 Liiv, Heino 333, 341, 380  
 Lim, Hyunjung 869  
 Lin, Lianhe 544, 962–964  
 Lindblom, Björn 700  
 Linder, Jean 914  
 Lindsay, Jayne 895  
 Lindvall, Ann 137  
 Linke, Angelika 227  
 Linoff, Gordon 827  
 Litman, Diane J. 829  
 Liu, Danqing 960–961  
 Liu, Jian 96  
 Liu, Lianyuan 107  
 Liu, Yinglin 952–953  
 Liu, Yuan 99, 102, 104–106, 949, 952  
 Livesay, Kevin 344  
 Livesey, Eleanor 301  
 Ljapunov, Aleksej A. 59, 72–73, 75  
 Ljung, M. 314  
 Lloyd, Paul 614  
 Lloyd, S. 735  
 Loatman, Bruce R. 925  
 Łobacz, Piotra 116–117  
 Lohse, Barbara 279–280  
 Lomkovskaja, M. V. 70  
 Long, Daniel, 92  
 Lord, R. D. 260, 370  
 Lorenz, Edward N. 698  
 Lorenz, M. 993  
 Lorge, I. 314  
 Lotka, Alfred 695, 701, 718  
 Lovins, Julie B. 984  
 Lowe, D. 392  
 Lua, Kim Teng 111, 949, 953, 961, 963–964  
 Lucas, Simon 934  
 Lucassen, J. 932, 934  
 Lucke, Helmut 842  
 Ludeen, D. M. 317  
 Lüdtke, Helmut 614  
 Ludviková, M. 132, 378  
 Luhn, Hans Peter 974–975  
 Lui, Ho Chung 112  
 Lujewa, N. 440  
 Luk, Robert 933  
 Luk'janenkov, Kuz'ma 870–871, 873  
 Luk'janov, S. M. 29–31  
 Łukaszewicz, Józef 120  
 Lukenčuk, A. V.  
 Lukić, V. 317  
 Lund, Kay 344  
 Lundberg, G. A. 149  
 Lunde, Ken 103–104  
 Luo, Chi-Ching 110  
 Lurija, Aleksander R. 912, 988, 995  
 Lutosławski, Wincenty 119–120, 371  
 Lyons, John 466, 739
- M**
- Maas, Heinz-Dieter 364  
 Macaluso-Haynes, Sara 895  
 Macherey, K. 812  
 Mackintosh, Kristen 972, 980  
 Mackovskij, Mihail S. 914  
 MacNeillage, P. 700  
 MacWhinney, Brian 821  
 Maddieson, Ian 215, 224–225, 562–563, 569  
 Madigan, Stephen 251  
 Magana, Anastasia 138  
 Magdics, Klara 794  
 Magerman, David M. 822, 828–829, 852–853  
 Mahadevan, Iravatham 721–722  
 Maher, Brendan A. 988, 994–995, 998  
 Makarskaya, Svetlana 926  
 Makridakis, Spyros 741  
 Maksimenko, T. V. 999  
 Malavazos, Christos 139  
 Malinowski, Bronislaw K. 971  
 Malov, A. V. 462  
 Manandhar, Suresh 825  
 Mańczak, Witold 126, 372, 621  
 Mandelbrot, Benoit 4, 70, 120–121, 123, 149–150, 326, 336, 406–407, 652, 699, 716, 726, 728, 732–734, 793, 795–796, 800, 881, 989  
 Mandl, Heinz 913  
 Mani, Inderjeet 926  
 Manning, Christopher D. 341, 344, 822, 848  
 Maratsos, Michael 138  
 Marbe, Karl 208, 210–211,  
 Marcken, Carl de 296  
 Marcu, Daniel 927  
 Marcus, Mitch P. 852  
 Marcus, Solomon 342, 874  
 Mareschal, Michel 887  
 Margolus, Norman 699  
 Margueron, Claude 609  
 Marin, Janet 828  
 Mariotti, Filippo 3  
 Mark, Kevin E. 862  
 Markantonatou, Stella 139  
 Markner-Jäger, B. 460, 668, 680, 794  
 Markov, Andrej A. 3, 36–38, 40, 371  
 Marle, Jaap van 249  
 Mârquez, Lluís 828  
 Martin, Robert 308, 447  
 Martin, S. 811  
 Martin, Willy 373  
 Martináková-Rendeková, Zuzana 285, 367, 761, 773, 795, 800  
 Martindale, Collin 194, 392, 652, 654, 796, 999–1000  
 Martinet, André 149, 194, 778–779, 785–786, 788  
 Martynenko, Grigorij J. 371–372, 794  
 Marusenko, Michail A. 372  
 Marx, Wolfgang 381  
 Marziali, Alessandro 274  
 Masand, Brijji 827  
 Mase, Yoshio 92  
 Maškina, Ljudmila E. 859, 927  
 Maslova, Elena 278, 555, 557–558, 566–568, 571, 573  
 Maslowski, W. 314  
 Mason, Jana M. 912  
 Mathesius, Vilém 130, 132, 432  
 Matsui, Kunio 106  
 Matsuura, Tsukasa 91  
 Matthews, Peter H. 227  
 Matthews, Robert 392, 394  
 Matula, Miloš 133  
 Mayenowa, Maria R. 121  
 Mayer, Richard E. 913  
 Mayerthaler, Willi 596, 701, 787  
 Mayzner, M. S. 314  
 Mažejka, N. S. 314  
 McCafferty, Kevin 275, 282  
 McCarthy, Joseph F. 829  
 McCleary, Richard 741  
 McClelland, James L. 705, 821, 892  
 McColly, W. B. 388  
 McCulloch, Neil 934  
 McEnery, Tony 901  
 McGill, Michael J. 344, 975  
 McGill, W. J. 897  
 McIntosh, Angus 466

- McIntosh, Robert P. 429  
 McIntyre, B. 391  
 McKenzie, Dean 194, 392, 652, 654, 796  
 McKeown, Kathleen R. 927, 979  
 McKinnon, Alastair 372–373  
 McLaughlin, G. Harry 915  
 McMahon, April & Robert 642  
 McMahon, April 634  
 McNeil, Donald R. 364  
 McWhorter, John H. 276  
 Mead, R. 402  
 Mears, John E. 914  
 Medrano, Paulina 799  
 Medvedev, Vsevolod I. 999  
 Mehler, Alexander 327, 331, 341, 344  
 Meier, Helmut 17–18, 781, 924  
 Meillet, Antoine 144, 609, 622–623, 625  
 Meineke, Eckhard 787  
 Meißner, B. 392  
 Mel'čuk, Igor' A. 71–72  
 Mellish Chris 821  
 Ménard, N. 389–390  
 Mende, Werner 696, 700  
 Mendenhall, Thomas C. 371, 387 810  
 Menezes, A. 813  
 Menn, Lise 892–893  
 Mennen, Ineke 137  
 Menzel, Cornelia 98, 770, 948–949, 965  
 Menzerath, Paul 17–18, 70, 191, 203, 224, 261, 650–661, 682  
 Mercer, L. R. 808  
 Mercer, Robert L. 822, 932  
 Merialdo, Bernard 812, 972  
 Meriggi, Piero 144  
 Meringer, R. 622–623  
 Merriam, Thomas 392  
 Merzyn, Gottfried 912  
 Metoyer-Dyran, Cheryl 915  
 Meyer, Ernst A. 688  
 Meyer, Ingrid 972, 980  
 Meyer, Lothar 913  
 Meyer, Peter 264–265, 799  
 Meyer-Eppler, Werner 4, 17, 217, 222  
 Meyer-Lübke, Wilhelm 609, 614, 620  
 Michael, Jörg 543  
 Michaelson, S. 377, 394  
 Michajlova, Irina V. 871  
 Michéa, René 313, 899, 901  
 Mihăescu, Haralambie 611  
 Mikerina, Tat'jana A. 859  
 Mikhailov, Andrei 843, 845–846  
 Mikhlín, Grigorij Z. 875  
 Mikk, Jaan 343, 909, 911–916  
 Mikros, George 137–139  
 Milbury-Steen, J.903  
 Miles, Josephine 377, 381  
 Milevskij, Tadeus 752  
 Milford, G.903  
 Milic, Louis T. 371, 373, 377  
 Miller, D. E. 317  
 Miller, Diane 893  
 Miller, George A. 142–143, 407, 467, 652, 726, 728, 740, 795–796  
 Miller, James G. 191  
 Miller, Michael I. 862, 875  
 Mills, Anne E. 239  
 Milroy, Lesley 895  
 Minami-Manshuu Kyooikukai 84–85  
 Minker, Wolfgang 842, 934  
 Mistrik, Jozef 314, 317, 371, 375  
 Mitchell, Melanie 825  
 Mitchell, Tom 822  
 Mithun, Marianne 278, 600  
 Miyajima, Tatsuo 941–942  
 Mizutani, Sizuo 85–88, 91, 93, 235, 364, 976  
 Mobasher, Bumshad 344  
 Moe, Alden J. 914  
 Mohri, Takao 826  
 Moles, A. A. 321  
 Mološnaja, Tat'jana M. 71–72  
 Monroe, George K. 219  
 Montroll, Elliott W. 731  
 Moody, James E. 995  
 Mooney, Raymond J. 822, 829–830  
 Moore, Andrew 825  
 Moreno, Roxana 913  
 Morgan, Augustus de 260, 370, 387  
 Morgan, Nelson 837  
 Morioka, Kenji 939, 942  
 Moriwaki, Kaname 84  
 Morkovkin, V. V. 314  
 Morozov, Nikolaj A. 37–39, 371  
 Morrissey, P. 391  
 Morton, Andrew Q. 370, 377, 387, 394  
 Mosenthal, Peter B. 914  
 Moser, Hugo 779, 785–786, 788  
 Moses, L. 642  
 Moskovič, V. A. 461, 466, 469  
 Mosteller, F. 373, 387–389, 392, 726  
 Mottron, Laurent 328–329, 702  
 Moxey, L. M. 394  
 Mucha, Hans-Joachim 536, 544  
 Muchamedov, Sabit A. 868  
 Müller, Barbara 799  
 Muller, Charles 4, 18, 21 371, 373–376, 380, 800  
 Müller, F. 696  
 Müller, Werner 364  
 Muravycka, M. P. 458  
 Murre, Jaap 821  
 Musurivska, O. V. 467  
 Myers, Jerome L. 915  
 Myhill, John 476, 481, 485, 489, 494–495, 559, 560, 604–605
- N
- Nadarejšvili, Isabella Š. 194, 364, 652, 792, 795  
 Nadas, A. 810  
 Nagao, Makoto 827  
 Nagata, Shin 84  
 Nagórko, Alicja 118  
 Nagy, Gábor T. 370  
 Nair, K. K. 722  
 Nakagawa, Hiroshi 983  
 Nakano, Hiroshi 91  
 Naranan, Sundaresan 308, 407–408, 718, 720–735, 792–793–795, 798, 881–885, 889  
 Narrog, Heiko 587, 589  
 Natarajan, Ballas K. 822  
 Natsopoulos, Demetrios 138  
 Naumann, Carl Ludwig 532–533, 535–537  
 Naumann, Sven 808  
 Nauta Jr., Doede 857–858, 862  
 Nedobrovo, N. V. 31  
 Nehaj, Olga A. 927  
 Narrog, Heiko 587, 589  
 Nejt, Anneke 248, 403  
 Nemcová, Emília 651, 800–801  
 Nerbonne, John 547  
 Nešitoj, V. V. 364  
 Nespor, Marina 137  
 Nespoulous, Jean-Luc 893  
 Nestler, Käte 913–914  
 Nettle, Daniel 223, 639  
 Neuhaus, Hans J. 248  
 Nevel'skij, Pëtr B. 858, 860  
 Newell, Alan 923  
 Newman, Julian 857  
 Newmeyer, Frederick J. 278  
 Ney, Hermann 808–809, 811–818  
 Ng, Hwee Tou 827  
 Nguyen, Sy Ty 913  
 Nichols, Johanna 275, 555, 557, 560, 562–564, 569–570, 573–574, 587, 589, 591–593, 598–599, 601–602, 604  
 Nicolis, Cathy 726  
 Nicolis, Grégoire 418, 726, 887–888, 891  
 Nicolis, John S. 726  
 Nida, E. A. 227  
 Niehaus, Brigitta 256, 301, 798–799  
 Niemi, Jussi 893  
 Niemikorpi, A. 313, 317  
 Nießen, S. 808, 816  
 Nikandrov, Nikolai D. 916  
 Nikitopoulos, Pantelis 18, 374

- Nikoladze, K. Ja.  
 Nikolaeva, Tat'jana M. 59, 77  
 Nikolaidis, Katerina 139  
 Nikonov, Vladimir A. 194  
 Nilson, Osvald 912  
 Nirasawa, Tadashi 91  
 Nishimoto, Eiji 950  
 Niyogi, Partha 821  
 Nomura, Masaaki 940–941, 943–944  
 Nonnenmacher, F. 914  
 Noreault, Terry 975  
 North, Alvin 895  
 Norton, Robert E. 747  
 Nöth, Winfried 328  
 Novak, Lidia 872, 875  
 Novák, Pavel 133  
 Nozaki, Hironari 940  
 Nübold, Peter 18  
 Nurius, Paula S. 740–741  
 Nusbaum, Howard C. 933  
 Nussbaumer, Markus 227  
 Nuyts, Jan 12  
 Nyman, Martti 587  
 Nymm, Voldemar 926
- O
- O'Brien, Edward J. 915  
 O'Brien, Paul 902  
 O'Donnell, Bernard 369, 373  
 O'Grady, R. 634  
 O'Shea, M. V. 317  
 O'Sullivan, Joseph A. 875  
 Oblor, Loraine 892–893, 895  
 Obregón, Tomasz 118  
 Obuchova, N. V. 460  
 Och, F. J. 808, 812, 814–816, 875, 927  
 Ogata, Hiroaki 900  
 Ogura, Mieko 282  
 Ohlsen, Richard A. 809, 828  
 Okabe, Atsuyuki 503, 545  
 Ol'chin, P. 38  
 Olšanskij, J. G. 459  
 Olson, Kenneth 559  
 Oltman, Philip K. 993  
 Oltmanns, T. F. 993  
 Omnès, Roland 715  
 Omohundro, Stephen 295  
 Ondar, Kh. O. 36  
 Oomen, Ursula 328  
 Oonishi, Masao 83, 84  
 Ooyama, Yoshifumi 828  
 Oppenheim, R. 390  
 Oppenheim, Rosa 748  
 Ord, J. Keith 211, 258, 264, 270, 794, 798  
 Orlov, Jurij K. 4, 145, 147–148, 194, 267, 334–337, 344, 364, 389, 400, 652, 792–793, 795–796, 800, 995, 998
- Orth, Bernhard 499  
 Ortmanns, S. 816  
 Osborne, Randy 295  
 Osgood, Charles 219–220  
 Oswalt, Robert L. 637–638  
 Otanes, Fe T. 482  
 Otkupščikova, Marija I. 993  
 Oudart, Paul 905  
 Ovsjannikov, Aleksandr O. 900
- P
- Pääkkönen, Matti 194  
 Pacholok, H. M. 467  
 Padučeva, Elena V. 70  
 Pagoni, Stamatoula 137  
 Paiva Alves, Eduardo de 274  
 Paivio, Allan 251  
 Palek, Bohumil 131  
 Palermo, D. S. 651  
 Palková, Zdena 133  
 Palmer, Frank 381  
 Palmer, Martha 112  
 Panagopoulos, E. 136, 138  
 Panjer, Harry H. 652  
 Pantéra, Laurent 982, 984  
 Papadopoulou, Despina 138  
 Papageorgiou, Harris 138–139  
 Papavasileiou, Basilis 136  
 Papazachariou, Demetris 138  
 Paper, Herbert H. 184–185  
 Papineni, K. 812, 818  
 Papp, Ferenc 23, 65, 67, 460  
 Paradis, Michel 895  
 Paramskas, D. M. 903  
 Pareto, Vilfredo 716, 718, 732, 793  
 Parfitt, S. 933  
 Parker, H. A. 371, 377  
 Parker, Roscoe E. 371  
 Parker-Rhodes, Arthur F. 793, 798  
 Parry, Milman 371  
 Parzinger, P. 371  
 Paskaleva, Elena 902  
 Paškovskij, Vladimir E. 857, 889–893, 995–998, 1000  
 Pasxalis, S. 136  
 Paul, Hermann 459, 775, 779  
 Pavlidou, Theodossia 137  
 Pavlov, Ivan P. 988  
 Pawłowski, Adam 117, 120–122, 390, 741–748  
 Payne, Doris L. 600  
 Pazienza, Maria Teresa 274  
 Pearl, Judea 842  
 Pearson, Jennifer 958  
 Peck, Gwendolyn 914  
 Peeck, Joan 913  
 Peirce, Charles S. 330, 538  
 Peitgen, Heinz-Otto 698  
 Penke, Martina 893
- Pensado, José L. 12  
 Perebejnos, Valentina I. 369, 372, 378  
 Pereira, Fernando 295  
 Perera, Katharine 916  
 Pericliev, Vladimir 565  
 Perkins, Lisa 895  
 Perkins, Revere D. 554–558, 569, 573  
 Perline, Richard 726  
 Perry, John 327  
 Peschel, Manfred 696  
 Peškovskij, Aleksandr M. 27, 44–45, 53, 56–57, 60  
 Pestunova, Valentina 870  
 Peterson, David A. 275  
 Peterson, Michail N. 26–27, 53, 56–57, 59–60, 70  
 Petitot, Jean 416  
 Petitot-Cocorda, Jean 700, 702  
 Petöfi, János S. 431  
 Petrásek, S. 133  
 Petrova, Natal'ja 872–873  
 Petrova, S. 317  
 Petruszewycz, Micheline 740  
 Pfingsten, Friedericke 227  
 Phal, A. 314  
 Phelan, W. S. 388  
 Phillips, Martin 332  
 Picard, Marc 614  
 Piepenbrock, Richard 229, 243  
 Pieper, Ursula 325, 330, 333, 339, 340  
 Piirainen, Ilpo T. 19  
 Pinker, Steven 710  
 Pinson, Suzanne 498  
 Piotrovskaja → Piotrowska  
 Piotrovskij → Piotrowski  
 Piotrowska, Anna 14, 71, 155, 169, 261–262, 751, 793, 857–858, 903  
 Piotrowska, Weronika 988, 990, 992–993, 995, 1000  
 Piotrowska, Xenia (Piotrovskaja, Ksenija) 903, 905  
 Piotrowski, Rajmond G. (Piotrovskij, Rajmund G.) 4, 21, 70–72, 155, 169, 261–262, 308, 321, 326–327, 338, 344, 751, 793, 857–858, 860–863, 865, 870, 873–875, 899–901, 903, 922–923, 925–926, 928–929, 988–990, 992, 995  
 Piperidis, Stelios 138–139  
 Pisarek, Walery 121, 314  
 Plag, Ingo 247, 250  
 Plank, Frans 278, 554, 559, 575, 588  
 Plass, Jan L. 913  
 Plath, Peter J. 699  
 Platzack, Christer 916  
 Plaza, Enric 825  
 Pléh, Csaba 895

- Plochinskij, N. A. 994  
 Plungian, Vladimir 587  
 Podehl, Ralf 799  
 Poincaré, Henri 693, 698  
 Pokorny, Julius 639  
 Polák, J. 133  
 Polanco Roig, Lluís B. 510  
 Polat, Elena 901  
 Poletaev, Igor' A. 74  
 Polikarpov, Anatolij A. 459–463  
 Pulitzer, Robert 609–610  
 Polivanov, Evgenij D. 26, 60–61, 66  
 Poole, Keith T. 561  
 Popeskul, Anatolij N. 922, 925–926  
 Popovic, Mirko 984  
 Popper, Karl R. 8, 348  
 Port, Robert F. 413  
 Portmann, Paul R. 227  
 Porzig, Walter 466, 468  
 Post, Rudolf 533  
 Post, Stephen D. 925  
 Pott, A. F. 261, 614  
 Prasada, Sandeep 710  
 Prell, Heinz Peter 236  
 Preston, Keith 926  
 Prigogine, Ilya 418, 689, 761, 887–888, 891  
 Prikk, Evi 912  
 Prince, Alan 784, 788  
 Prince, Ellen F. 474–476, 478, 495  
 Prinou, Eirini 136  
 Proskurnin, N. 38  
 Průcha, Jan 131, 149  
 Prün, Claudia 143, 149, 730, 793, 796  
 Pszczołowska, Lucylla 121  
 Pudlatz, H. 545  
 Putschke, W. 532, 535, 537  
 Pylyshin, Zenon W. 373
- Q**  
 Qiu, Xigui 948  
 Quasim, Erika 580  
 Quinlan, John R. 822, 827, 829
- R**  
 Rabe, H. 775  
 Rabin, Annette T. 914  
 Rabiner, Lawrence R. 813–814, 839  
 Rachmanov, J. V. 459  
 Rachwałowa, Maria 122  
 Radford, Andrew 782  
 Radil-Weiss, Tomas 364, 800  
 Raether, Anette 650–651  
 Ragin, A. B. 993  
 Raitar, Siiri 866, 870  
 Rajman, Martin 333  
 Raleigh, Donna 902  
 Ramakrishna, B. S. 722, 725  
 Rand, David 484  
 Rapoport, Anatol 423, 792–793, 795  
 Rastrigin, Leonard A. 898  
 Ratkowsky, David 364, 376, 800  
 Ratnaparkhi, Adwait 811, 875  
 Rauch, M. 909  
 Rauh, Jürgen 507  
 Razumovskij, Vassili G. 916  
 Reder, Lynne M. 251  
 Redner, Sidney 732  
 Reformatskij, Aleksandr A. 23, 59, 68, 75  
 Reichenkron, Günter 609  
 Reilly, Ronan G. 825  
 Reischies, Friedel M. 993  
 Reithinger, N. 817  
 Rentzepopoulos, Panagiotos 138  
 Renuf, Antoinette 246–248  
 Rényi, Alfred 736, 880  
 Repkina, G. V. 916  
 Resnik, Philip 821  
 Rettweiler, Hildegard 670  
 Revzin, Isaak I. 70–71, 73, 75–76, 318  
 Rexová, K. 642  
 Reynolds, Allan G. 373  
 Rheinländer, Nicole 267  
 Riccardi, Giuseppe 808, 813, 842  
 Richardson, S. D. 813  
 Richman, Barry 314–317, 321, 899  
 Richter, Elise 144  
 Richter-Dyn, Nira 628  
 Rickheit, Gert 328–329  
 Riedemann, Gesa 264, 266  
 Riesbeck, Christopher 825  
 Rijkhoff, Jan 275, 555–556  
 Riloff, Ellen 822, 825, 827  
 Ringe, Donald A. Jr. 634, 638, 642  
 Rinsland, H. D. 314, 317  
 Ritter, Constantin 371  
 Rivanc, Paul 313, 899, 901  
 Roberts, Aaron H. 191, 350, 390, 669, 670  
 Roberts, Alan 743, 748  
 Robins, Robert H. 233  
 Robinson, Derek 709  
 Ročeric, Alexandra 860  
 Ročlawski, Bronisław 116  
 Rodríguez, Horacio 828, 924  
 Roelcke, Thorsten 780, 783, 788  
 Rogers, Francis M. 142–143, 147, 149  
 Rohlfs, Gerhard 609–611  
 Rohr, W. Günther 778  
 Romanov, Yuri 923  
 Romanova, T. A. 274–275, 467  
 Ronneberger-Sibold, Elke 779, 780, 785–788  
 Ronzhin, Andrey L. 843  
 Roos, Eckhard 466  
 Roossin, Paul S. 929  
 Rooth, Mats 851  
 Rosch, Eleanor 784, 788  
 Rosenberg, Charles R. 934  
 Rosenberg, Newton M. 913  
 Rosengren, Inger 424, 436, 445  
 Rosetti, Alexandru 624  
 Ross, Alan S. C. 191, 636–639, 642  
 Ross, Donald Jr. 376, 390, 744  
 Rossel, Peter 913  
 Rössler, Otto E. 697  
 Roth, M. 295  
 Rothe, Ursula 20, 228, 233, 236–237, 460, 646, 650–651, 668, 678–680, 794, 798  
 Rott, Walter 282, 372, 627–628, 639  
 Röttger, Winfred 799  
 Rottmann, Otto 308  
 Rouault, Alain 798  
 Roudet, L. 659  
 Roukk, Maria 301  
 Roukos, Salim 296, 812, 818  
 Rousseau, Ronald 98, 962–963  
 Rousseeuw, Peter J. 544  
 Rozenbaum, Michail D. 858, 860, 871  
 Rozencvejk, Viktor Ju. 72–75  
 Rozwadowski, Jan 624  
 Rubin, Andee 914  
 Rubin, Donald B. 293  
 Rude, Noel 483  
 Rudman, J. 394  
 Ruhani, M. 314  
 Rumelhart, David E. 705, 821, 892  
 Rumpel, Dieter 871  
 Rutten, C. 317  
 Rutter, D. R. 989
- S**  
 Saam, Christian 774  
 Saaty, Thomas L. 442  
 Sabourin, Conrad F. 16, 1003  
 Sadčikova, P. V. 317, 1003  
 Sadock, Benjamin J. 992  
 Sadock, Virginia A. 992  
 Sadowski, K. 914  
 Saf'jan, J. A. 314  
 Safarewicz, Jan 611  
 Sagisaka, Yoshinori 928  
 Saiga, Hideo 940, 942  
 Šajkevič, A. Ja. 467  
 Sakai, Hiromu 869  
 Sakamoto, Ichiroo 85

- Salem, André 333, 341, 344  
 Salmelin, Riitta 892  
 Saloni, Zygmunt 188  
 Salton, Gerard 344, 974–975, 977  
 Salzberg, Steven 825–826  
 Sambor, Jadwiga 115, 119, 121–121, 124–125, 308, 314, 375, 448–449, 452, 456–457, 460, 668, 679, 793  
 Sams, M. 901  
 Samuels, S. Jay. 909, 913–914  
 Sanada, Shinji 92  
 Sandefur, James T. 352  
 Sanders, A. 903  
 Sanders, Ruth H. 903  
 Sandig, Barbara 779  
 Sanford, A. J. 394  
 Sankoff, David 292, 484, 511, 543, 638  
 Šanskij, N. M. 466  
 Sapir, Edward 579, 581, 583  
 Saporta, Sol 182, 219–220  
 Sappok, Christian 332, 741  
 Saramago, João 510  
 Sas, L. F. 610  
 Sasahara, Hiroyuki 940  
 Satake, Hideo 91, 939, 940, 943  
 Saukkonen, Pauli 136, 274–275, 280, 313, 317, 381  
 Šaumjan, Sebastian K. 68  
 Saube, Dietmar 698  
 Saussure, Ferdinand de 25, 53, 624, 739, 825, 857  
 Savic, Michael 924  
 Savin, Harris B. 913  
 Sawayanagi, Seitaroo 84  
 Ščeglov, Jurij K. 77  
 Ščerbina, Fedor A. 24  
 Scha, Remko 827  
 Schaal, Charles 825  
 Schabes, Yves 295, 297, 854  
 Schachter, Paul 482  
 Schade, Ulrich 892  
 Schaefer, Burkhard 233  
 Schalow, Susan R. 914  
 Schank, Roger 825  
 Schanze, Helmut 18  
 Schegloff, Emanuel A. 471, 894  
 Scheler, Gabriele 822, 825  
 Schellinger, Wolfgang 559  
 Scheurle, Daniela 735  
 Schierholz, Stefan J. 235, 459, 460, 462  
 Schiffrin, Deborah 472  
 Schils, Erik 390, 394, 748  
 Schiltz, Guillaume 500, 534, 537  
 Schippan, Thea 459, 464–465  
 Schleicher, August 24, 580, 641  
 Schlenck, Klaus-Jürgen 894  
 Schlesinger, I. M. 912  
 Schlismann, Annemarie 376  
 Schmid, Hans-Jörg 784  
 Schmid, Helmut 828  
 Schmidt, Siegfried J. 445  
 Schmidt, Wilhelm 459, 466, 779  
 Schneider, Edgar W. 495, 499  
 Schnotz, Wolfgang 913  
 Schogt, Henry 620  
 Scholfield, Phil 138  
 Scholz, Christian 777  
 Schreuder, Robert 231, 237–238, 250–253  
 Schröder, Ulla 270  
 Schrödinger, Erwin 878, 885–886  
 Schroeder, Manfred 350, 731, 792  
 Schultink, Henk 243, 249  
 Schultz v. Thun, Friedemann 910, 912  
 Schultz, T. 924  
 Schulz, Klaus-Peter 191, 196–199  
 Schumacher, Frank 235  
 Schuster, Heinz Georg 698  
 Schütze, Hinrich 341, 344, 822  
 Schuyler, Michael R. 909, 914  
 Schwan, E. 620  
 Schwarz, Claudia 351, 353, 434  
 Schweers, Anja 234, 801  
 Schwibbe, Michael H. 20, 255, 308, 349–350, 360, 432, 664, 666, 668–669, 670–671, 681–684, 686, 730, 792–793  
 Schwier, Christa 913  
 Searle, John R. 471, 778–779  
 Segal, Dmitrij M. 65, 76, 194  
 Segulier, N. 988  
 Séguy, Jean 21, 498  
 Seiler, Hansjakob 594  
 Sejnowski, Terrence J. 934  
 Šelimova, I. N. 70  
 Selvin, Hanan C. 381  
 Semenjuk, T. 469  
 Šengeli, Georgij 30, 33–35, 43, 49, 76  
 Sereno, Joan 137, 253  
 Servan-Schreiber, David 1000  
 Service, Elisabet 892  
 Setnickij, Nikolaj 31, 39–40  
 Sevestre, P. 988  
 Seyffert, Peter 65, 68, 75  
 Sgall, Petr 431, 433  
 Sgarbas, Kyriakos 138, 932  
 Shadily, Hassan 193  
 Shaikevich, A. Ya. 373  
 Shane, M. L. 316  
 Shannon, Claude 4, 76, 91, 131, 217, 708, 716, 726–727, 728, 732, 734–735, 739–740, 747, 859–860, 875, 878–879, 880–886, 899, 963, 980  
 Sharkey, Noel E. 825  
 Shaterian, A. 614  
 Shen, Dayang 106  
 Shen, Xu 96  
 Shen, Xukun 106  
 Shenton, Leanne R. 798  
 Sherman, Lucius A. 3, 298, 371, 377  
 Shibata, Takeshi 937  
 Shibuya, Masaaki 88  
 Shih, Chinlin 106  
 Shimuzu, Kunio 731  
 Shipman, Dave 932  
 Shirai, Satoshi 828  
 Shlesinger, Michael F. 731  
 Shtrikman, S. 798, 962  
 Shultz, C. 726  
 Siatkowski, Janusz 624  
 Sibata, Takesi 92  
 Sichel, H. S. 299, 389, 400, 793, 796, 800  
 Sicilia-Garcia, E. I. 963  
 Sierpinski, Waclaw 699  
 Siewierska, Anna 554, 570, 575, 598, 601–603, 739  
 Sigurd, Bengt 194, 650, 797  
 Sil' nitskij Georgij G. 468, 752, 754, 758  
 Silnitsky, George (Sil' nitskij Georgij G.) 229, 378, 752–755, 758  
 Sima'an, Khalil 827, 854  
 Simmons, Robert F. 827  
 Simon, Herbert A. 364, 407, 653, 727, 793, 796, 800  
 Simov, Kiril 902  
 Simpson, E. H. 374, 389–390, 571  
 Sinclair, John M. 466, 972  
 Singh, S. 392  
 Sioran, Siril 901  
 Širokov, Oleg S. 71  
 Siskind, Jeffrey 821  
 Šjarnas, Vitautas I. 915  
 Skalička, Vladimír 579, 581, 583–587  
 Skalmowski, Wojciech 127  
 Skiba, V. P. 495  
 Skinner, Berres F. 901  
 Skinner, Burrhus F. 332, 740  
 Skousen, Royal 253, 705, 711, 713–715, 825  
 Slama-Cazacu, Tatiana 860  
 Slator, Brian M. 928  
 Sleator, Daniel 296  
 Slutzki Giora 821  
 Smadja, Frank 927, 979  
 Smith, Adam 776  
 Smith, Adolph E. 364, 366  
 Smith, F. 916  
 Smith, Jason A. 726  
 Smith, Joseph 389  
 Smolensky, Paul 784, 788  
 Sneath, Peter H. A. 498, 536, 641  
 Sochor, Aron M. 913

- Söderpalm, Eva 892  
 Sodeur, Wolfgang 499  
 Sokal, Robert R. 498, 536, 634, 636, 641  
 Sokolova, Svetlana V. 905  
 Somers, Herman H. 370–371, 374, 381, 795, 859, 874  
 Song, Shaozhou 952–953  
 Southworth, Franklin C. 341  
 Souza, Peter V. de 815  
 Spang-Hanssen, Henning 979  
 Sparck-Jones, Karen 976  
 Sperber, Dan 778  
 Spevack, M. 317  
 Spinks, Nelda 914  
 Spitzbardt, Harry 65  
 Spitzer, Manfred 988, 995, 998  
 Spivak, Dmitrij L. 998–999  
 Spolnicka, S. V. 307, 460–461  
 Spolsky, Bernard 901  
 Sproat, Richard 106, 250  
 Šrejder, J. A. 795  
 Srivastava, Jaideep 344  
 Stadlober, Ernst 178  
 Stan, Ionel 552  
 Standal, Timothy C. 914  
 Stanfill, Craig 825–826, 933  
 Stanislav, Jan 625  
 Stanley, H. Eugene 738  
 Stanley, J. C. 751  
 Stark, Alexandra B. 269  
 Stark, Jaqueline 896  
 Starkweather, J. A. 317  
 Stavrakaki, Stavroula 138  
 Steblin-Kamenskij, M. I. 72  
 Steel, S. 599, 601–603  
 Steffen-Batóg, Maria 116–117  
 Stegmüller, Wolfgang 532  
 Stein, G. Z. 402  
 Steinbiss, V. 808  
 Steiner, Peter 27  
 Steiner, Petra 233–236, 770, 793  
 Steinitz, Wolfgang 468  
 Štejnfeldt, È. A. 317, 320  
 Stemmer, Brigitte 892, 895  
 Stepanov, Arthur V. 582–583  
 Stepanowa, Marija D. 228  
 Stephens, Laurence D. 562–563, 569, 638  
 Štindlová, Jitka 131  
 Stitz, Katrin 269  
 Stolcke, Andreas 295  
 Stolz, W. S. 810  
 Stone, Philip J. 828  
 Stonier, Tom 886–887, 889  
 Strauß, Udo 332  
 Strehlow, Michael 301  
 Stricker, Lawrence J. 550  
 Strietzel, Horst 912–913  
 Strobel, Heike 270  
 Strohner, Hans 328–329  
 Strube, Gerhard 381  
 Struve, Petr B. 24  
 Stuart, Alan 198–199  
 Stubbs, Michael 326  
 Studdert-Kennedy, Michael 700  
 Su, Peicheng 98–100  
 Suchier, Hermann 620  
 Sugano, Ken 91  
 Sugihara, Kokichi 503, 545  
 Sullivan, Kirk P. 933  
 Šumilina, A. L. 70  
 Sumita, E. 813  
 Sun, Chaofen 494, 497  
 Sun, Jianyi 99, 962  
 Sun, Maosong 105–106  
 Sun, Wie 961–962  
 Sundt, Björn 652  
 Suppes, Patrick 292  
 Suprun, A. J. 314, 469  
 Sütterlin, L. 144  
 Svoboda, Aleš 133  
 Swadesh, Morris 309  
 Świeczkowski, Walerian 377  
 Sykes, B. C. 642
- T
- Taft, Marcus 253  
 Tagliavini, Carlo 317, 924  
 Tajima, Kazuo 937  
 Takagi, Midori 942  
 Takagi, Moriyasu 942  
 Takezawa, Toshiyuki 928  
 Tallentire, David R. 373, 377  
 Talmy, Leonard 421  
 Tamaoka, Katsuo 869  
 Tambouratzis, George 139  
 Tambovcev, Jurij A. 378  
 Tan, Qiang 106  
 Tanaka, Akio 377, 941  
 Tanaka, Hosumi 827  
 Tanaka, Suehiro 84  
 Tanaka, Tatsumi 940  
 Tang, Zhixiang 110–111  
 Tannenbaum, P. H. 810  
 Taranov, Leonid N. 916  
 Tart, Charles 999  
 Tausch, Reinhard 910, 912–913  
 Taylor, Martin M. 912  
 Taylor, Ann 281, 634, 642  
 Taylor, G. 391  
 Taylor, Insup 912  
 Tekavčić, Pavao 609  
 Terada, Torahiko 83  
 Terbeek, Dale 551  
 Tesak, Jürgen 893  
 Těšitelová, Marie 131, 239, 270, 371–377, 380–381  
 Tessiore, L. 817  
 Testelet, Yakov G. 569  
 Teupenhayn, Regina 668, 730  
 Thal, Donna 988  
 Thavenius, Jan 372–373  
 Thiessen, Alfred H. 503, 509–510, 544–545
- Thisted, R. A. 387, 391, 399, 719, 721  
 Thoiron, Philippe 372, 374, 389  
 Thom, René 411–413, 688, 692–694  
 Thomas, Herbert 901  
 Thomas, Joy A. 858  
 Thompson, Chad 473, 477, 483  
 Thompson, Richard A. 292  
 Thompson, S.A. 486  
 Thorndike, E. L. 84, 98, 146, 314, 717, 909  
 Thumb, Albert 16–17, 208, 210  
 Thümmel, Wolf 276, 604  
 Tibshirani, R. J. 808  
 Tillmann, C. 815–816  
 Tioun, Elena  
 Toffoli, Tommaso 699  
 Tokunaga, Takenobu 827  
 Tomaševskij, Boris V. 26, 29, 31–33, 35–36, 40, 42–53, 76, 740  
 Tombor, B. 732  
 Tomlin, Russell S. 556–557, 599, 601, 605  
 Tomson, Aleksandr I. 53  
 Toporov, Vladimir N. 56, 70, 75  
 Toppan, Insatsu 91  
 Torgerson, Warren S. 549–550  
 Toulmin, G. H. 391, 399  
 Tresselt, M. E. 314  
 Triantafyllou, Ioannis 139  
 Tripathi, Ram C. 797  
 Trnka, Bohumil 130–132, 146, 182  
 Troll, G. 726  
 Trubetzkoy, Nikolaj S. 60, 181–182, 261  
 Trudeau, G. B. 479–480  
 Tsapkini, Kvrana 138  
 Tse, E. K. 389, 392  
 Tsimpli, Ianthi-Maria 138  
 Tsonis, Anastasios A. 726  
 Tsuchiya, Shin'icki 939, 943  
 Tsukahara, Nobuyuki 941  
 Tsuruoka, Akio 92, 940  
 Tuldava, Juhan 4, 25, 199, 261–262, 274, 285, 308, 319, 325–327, 330, 333, 335–337, 339–341, 343–344, 364, 367, 370, 372–376, 378–381, 460–462, 467, 649, 724, 751, 793–796, 798, 800, 871, 910, 912, 914  
 Tuttle, H. 372  
 Twaddell, W. Freeman 144  
 Tweedie, Fiona J. 248, 274, 280, 364, 376, 389–394, 404–405, 740
- U
- Ubár, L. 314, 317  
 Udarceva, M. G. 74  
 Ueffing, N. 816

- Uhlenbeck, Eugenius M. 191  
 Uhlířová, Ludmila 132–134,  
 264, 268, 274–275, 280, 308,  
 650, 652, 795, 797, 800–801  
 Uibo, Heli 915–916  
 Uit den Boogaart, Piet C. 245  
 Ujomov, A. I. 501  
 Ulatowska, Hanna 895  
 Umino, Bin 972–973, 976  
 Ungerer, Friedrich 784  
 Uritescu, Dorin 552  
 Ushijima, Yoshitomo 84  
 Usova, Antonina V. 912, 916  
 Uspenskij, Vladimir A. 59, 69–  
 72, 74, 76
- V
- Väänänen, Veikko 609, 627  
 Vachek, Josef 130, 132–133  
 Valdois, S. 893  
 Valentini, Erwin 926  
 Valenza, R. J. 391  
 Valiachmetova, Diana R. 902  
 Vallance, Michael 901  
 van Coile, Bert 932, 934  
 Van den Bosch, Antal 712  
 van den Hout, E. 534  
 Van der Auwera, Johan 573–  
 574  
 van der Elst, Gaston 779  
 Van der Sloot, Ko 827  
 van Dijk, Teun A. 431, 433,  
 437–438, 739  
 van Gelder, Timothy 413  
 van Leeuwen, Hugo C. 932  
 van Rijn, H. 229  
 Vander Beke, G. 317  
 Vanecek, Erich 909, 912, 914,  
 916  
 Vapnik, Vladimir N. 578, 822  
 Vařavskij, L. A. 69  
 Vašák, Pavel 133  
 Vašjutočkin, G. S. 741  
 Vasmer, Max 624  
 Velinova, I. 317  
 Vennemann, Theo 559, 787  
 Verbickaja, Ljudmila A. 873  
 Vesper, Guntram 211  
 Vettermann, Anikó 270, 800  
 Vetulani, Grażyna 118, 122  
 Vetulani, Zygmunt 118, 122  
 Viehoff, Reinhold 18  
 Viehweger, Dieter 423–425, 432,  
 440  
 Viereck, Wolfgang 21, 499  
 Villup, A. 314  
 Vinogradov, Viktor V. 68, 459,  
 466  
 Vinokur, Grigorij O. 26, 42–43,  
 56, 59  
 Vlaseva, K. 317
- Vogel, Frank 533  
 Vogel, Friedrich 498, 511  
 Vogt, Hans 181  
 Volkmann, Lutz 442  
 Volockaja, Z. M. 70  
 Volterra, V. 696, 701  
 von Bertalanffy, Ludwig 760  
 von Hahn, W. 817  
 Vostokov, Aleksandr Ch. 45  
 Vulanović, Relja 274, 276–278,  
 281–282, 377  
 Vyšyvana, N. V. 466–467
- W
- Wagner, Günther 156  
 Wagner, Robert A. 985  
 Wahlster, Wolfgang 816  
 Wahrig, Gerhard 236, 255  
 Waibel, Alex 816, 924  
 Wake, W. C. 394  
 Walczak, Bogdan 118  
 Walker, Marilyn A. 862  
 Wallace, D. L. 373, 387–389,  
 392, 726  
 Wallesch, Claus-W. 894  
 Walsh, J. L. 142–143, 149  
 Walshaw, David 894–895  
 Walter, Wolfgang 629  
 Waltz, David 825–827  
 Wang, A.-L. 859  
 Wang, Dejin 102, 104, 949, 952  
 Wang, Hui 106  
 Wang, Jianxin 105, 108  
 Wang, Jinde 99  
 Wang, Kann Yu 98  
 Wang, Y.-Y. 816  
 Wapner, Wendy 895  
 Ward, Gregory L. 476  
 Ward, T. 641, 819  
 Warnow, T. 634, 642  
 Wasow, Thomas 279–280  
 Watanabe, Osamu 85, 91  
 Waters, Randy C. 297  
 Waters, Richard C. 854  
 Waugh, S. 392  
 Weaver, Brenda 915  
 Weaver, Warren 4, 76, 726–727  
 Weaver, William 740  
 Weber, Sabine 793–795  
 Wei, Juxian 97  
 Wei, Li 103  
 Wei, Yixin 948  
 Weidenmann, Bernd 913  
 Weier, D. 388  
 Weijters, Anton 253, 822, 827  
 Weinreich, Uriel 458  
 Weiss, Sholom 822  
 Weitzman, M. 389  
 Wells, Barron 914  
 Wells, Rulon 857  
 Wen, Xiaolin 105
- Wepman, J. 317  
 Wermter, Stefan 822, 825  
 Wernike, K. 700  
 Wessel, F. 811  
 West, Bruce J. 733  
 West, M. 899  
 Wettschereck, Dietrich 826  
 Wheeler, Eric S. 551–552  
 Wheeler, John A. 890  
 Wheelwright, Steven C. 741  
 Whitaker, Harry 892–893  
 Whitehorn, J. C. 143, 148  
 Whiteley, Paul 741  
 Whittle, Ruth 901  
 Whitworth, William A. 722  
 Wickmann, Dieter 340, 343  
 Wiegand, Herbert Ernst 509,  
 785, 788  
 Wiener, L. F. 641  
 Wiener, Norbert 74, 739  
 Wierzbicka, Anna 126–127  
 Wiio, Osmo A. 912  
 Wilde, Joachim 681  
 Wilder, Chris 779, 782  
 Wildgen, Wolfgang 19, 328–  
 329, 410, 412–413, 414,  
 417–419, 422, 689, 693–694,  
 701–703  
 Wilkinson, Ray 895  
 Wilks, Yorrik 928  
 Wille, Rudolf 538  
 Willett, Peter 984  
 Williams J. L. 730  
 Williams, Carrington B. 4, 299,  
 370–374, 377–378, 740  
 Williams, Colin P. 391, 714  
 Williams, Geoffrey 972  
 Willis, John C. 718, 732  
 Willmann, Rainer 532  
 Willmot, Gordon E. 652  
 Willows, Dale M. 913  
 Wilson, Andrew 901  
 Wilson, Deidre 778  
 Wilson, K. 901  
 Wilson, Victor L. 741  
 Wimmer, Gejza 209, 231–232,  
 235, 262–266, 268, 270, 271,  
 299–300, 302, 308, 340,  
 365–366, 651–656, 730, 792,  
 796–797, 799–801  
 Winter, Stefan 227  
 Winter, Werner 369, 377, 381  
 Witkovský, Viktor 652  
 Wittek, Martin 301  
 Wolin, B. R. 314  
 Wolski, Werner 785, 788  
 Wolter, Kirk M. 639  
 Wolters, Maria K. 934  
 Woodcock, Alexander 692  
 Woronczak, Jerzy 115, 120–123,  
 364, 376, 341, 793, 795–796  
 Wright, A. M. 250  
 Wright, Jeremy H. 808, 842

Wu, D. 813  
 Wu, Harry 976–977  
 Wulf, Douglas 710  
 Wulfeck, Beverly 892  
 Wünschmann, Manfred 913  
 Wurzel, Wolfgang 596, 779, 787  
 Wüster, Eugen 738, 788

## X

Xairetakis, Nikos 139  
 Xantos, Aris 741  
 Xiang, F. 813  
 Xiao, Hang 106  
 Xing Zhiqun 476, 481, 494–495  
 Xu, Guowei 106  
 Xu, Shen 96  
 Xue, Nianwen 112

## Y

Yamada, K. 813  
 Yang, C. S. 974, 977  
 Yang, Charles D. 581  
 Yang, Yiming 827  
 Yannakoudakis, Emanuel J. 932  
 Yasumoto, Biten 90–91, 939  
 Yin, Binyong 949–954, 963  
 Yngve, Victor H. 288–289  
 Yokoo, Akio 928  
 Yokoyama, Shojshi 940  
 You, Rujie 111  
 Young, Elaine L. 747  
 Young, Forrest W. 550  
 Young, Steve J. 295

Younger, Daniel 848  
 Yu, Clement T. 977  
 Yu, Shiwen 106, 108  
 Yu, Xiaoli 301  
 Yu, Yeong-Ho 827  
 Yuan, Chunfa 951  
 Yuille, John C. 251  
 Yule, George U. 3–4, 70, 120,  
 364, 371, 374, 377, 389–390,  
 636, 717, 722, 962

## Z

Zacharski, Ron 478–479, 480,  
 795  
 Zadeh, Lotfi A. 925  
 Zakaluk, Beverley L. 909, 913–  
 914  
 Zaliznjak, A. A. 625  
 Zamora, Antonio 925–926  
 Zampolli, A. 924  
 Zarebina, Maria 122  
 Zasorina, Lidija N. 69  
 Zavrel, Jakub 712, 827, 830  
 Zel'cman, Marina A. 865, 901  
 Železnov, N. A. 69  
 Zelle, John M. 830  
 Zeller, Eduard 371  
 Zemke, Stefan 829  
 Zerssen, Detlev v. 532  
 Zgółkowa, Halina 122, 317  
 Zhang, Qiaoqiao 98, 962–963  
 Zhang, Sheying 99  
 Zhang, T. 812  
 Zhang, Xinyuan 98  
 Zhang, Xuetao 99  
 Zhou, Youguang 99–100, 104

Zhu, Jinyang 234, 266–267,  
 270, 801, 954–955, 959–960  
 Zhu, Junsheng 96  
 Zhu, Xuefeng 106, 108  
 Ziegler, Arne 213, 234, 308, 359,  
 361, 423, 424, 426, 429,  
 431–436, 440, 442–445, 652,  
 801  
 Zinder, Lev R. 56, 69, 73  
 Zinenko, Svetlana 799  
 Zipf, George K. 3–4, 70, 76, 88,  
 98, 122, 124, 130–131, 142–  
 152, 229–230, 234, 262, 279,  
 301, 305, 308, 321, 330, 400,  
 406, 461, 500, 563, 614, 646,  
 648, 716–719, 722, 730, 732,  
 734, 762, 778–779, 781, 783,  
 792–793, 796, 798, 800,  
 881–882, 962–963, 969  
 Žirmunskij, Viktor M. 29  
 Zjuban, A. 995, 998  
 Žolkovskij, Aleksandr K. 75, 77  
 Zolotarëv, V. M. 70  
 Zolotova, Galina A. 899  
 Zörnig, Peter 20, 332, 336, 343,  
 378, 563, 651–652, 724, 741,  
 792–793, 795–796, 801  
 Zou, Jiayan 111,  
 Zrzavý, J. 642  
 Zsilka, Tibor 372–374, 376–378  
 Zubin, David A. 239  
 Zubov, Aleksandr V. 906  
 Zucchini, W. 402  
 Zue, Victor 923, 925  
 Zurek, Wojciech H. 882  
 Zveginzev, V. A. 459  
 Zwirner, Eberhard 17  
 Zwirner, Kurt 17

## Sachregister / Subject index

### A

- Abbildungsprinzip 499  
abbreviation 192  
Abdeckung, Text- 100, 336,  
952–953  
Abgeschlossenheit 335  
–, lexikalische 337  
Abhängigkeit 11, 19–20, 36, 333  
–, funktionale 1  
–, sequentielle 3  
Abkürzung 951  
–prozess 144, 229  
Abstand → Distanz  
abstractness 916  
– level 912  
Abstraktheitsstufe 462  
accentuation, dynamic 746  
acceptability, degree of 274  
accuracy, degree of 370  
activity, verbal-mental 921, 988,  
991  
adaptation readiness, degree of  
766  
Adjazenz 440  
age 306, 307  
Agglutination 587, 589  
Aggregat 667  
–, Text- 338–339, 668, 677  
aggregate 133, 351  
Aggressivität 184, 186–187, 190  
agrammatism 892–894, 1000  
Ähnlichkeit 7, 257, 330, 332,  
501, 537, 584, 633, 636, 641  
–, attraktive 190  
–, distributionelle 183  
–, globale 584  
–, linguistische 544  
–, paradigmatische 344  
–, phonetische 536  
–, phonologische 182  
–, semantische 469  
–skarte 502, 505  
–smaß 186, 344, 512, 536, 635–  
637  
–smatrix 502, 507  
–smessung 504  
Aktionsquotient 333  
Aktivsprache 587  
algorithm, genetic 392  
alignment, 813–814  
Allgemeinheitsprinzip 594  
Alliteration 33  
Allomorph 227  
Alphabet 58  
Alter 1  
–, Morphem- 228  
–, Wort- 6, 20, 148, 233–235,  
331, 333, 339, 340  
Altmann-Fitter 21  
Ambiguität, lexikalische 701  
ambiguity 275, 278  
–, syntactic 274  
Amphibrachys 48  
Analogie 10  
–bildung 16  
analogous development 126  
analogy 711  
Analyse 423  
–, bivariate 333  
–, denotative Text- 423-  
–ebene, linguistische 662  
–, multivariate 333  
–, Q- 501  
–, Stil- 71  
–, Textstruktur- 445  
analysis  
–, areal 573, 574  
–, cluster 92, 137, 139, 369, 380,  
759  
–, content 121  
–, correlational 751–759  
–, discourse 471–495  
Analytizität 459, 589  
–sindex 333  
Anapäst 48  
anaphora 910  
Anordnung 331  
–prozess 326  
Anpassungsprozess, rückläufiger  
628  
Anstrengung, Prinzip der ge-  
ringsten 4, 143, 147, 216,  
232, 458, 682, 778, 779, 781  
Anwendungsbedürfnis 237  
Anwendungsgrad 99, 101, 102  
aphasia 891–895  
–, de Broca's 892–893  
–, Wernicke's 892–893  
application 310  
approach, process-oriented 761  
Äquivalente, funktionale 20,  
629, 783  
archetype, semantic 418  
Arens'sche Regel 664, 666, 676  
ARIMA 741–744, 746, 748  
articulatory effort 306  
Artikel 68  
Artikulationsaufwand 216  
Artikulationspunkt 443  
aspect 137  
–, configurational 414  
–, energetic 414  
–, intentional 414  
association  
– criterion 977–978  
–, free word 995–997  
– flow 996–997  
– ratio 979  
–, semantic 353  
Assoziation 437, 443  
–sblock 444  
–sforschung 16  
–smaß 636  
–stendenz 189  
–, Wort- 366  
Assoziativität 331  
– des Hrebs 440  
Ästhetik, deskriptive 154  
Asymmetrie 507, 595  
attractor 366, 421, 647, 652  
–, chaotic 417  
–, mental 413  
–, search 417  
Attraktivität 184–185, 187–190  
Attraktor 425, 689, 693, 694,  
696, 702  
–, stabiler 698  
Auffälligkeit 98, 145  
Aufwand 778  
–, Artikulations- 216  
–, Dekodierungs- 144, 182, 216,  
238, 330  
–effizienz 778–779, 784, 785  
–, Gedächtnis- 238  
–, Produktions- 98, 144, 330  
–, sprachlicher 780  
–, Sprech- 144  
Ausdehnung 331  
Ausweg, Prinzip des letzten 782  
authorship 91, 121, 305, 368,  
388–389, 391–394, 726, 734,  
740, 747–748  
auto-correlation, acoustic 837  
automaton  
–, linguistic 921–934  
–, tutoring 903–906  
Autorschaft 154, 260, 298, 340  
axiom 765

### B

- balancing constant 793  
Baumkontur 643  
Bayes decision rule 810, 812  
Bayesian grammar induction  
295  
Bedeutung  
–, metaphorische 458  
–sabgrenzung 359  
–skomplexität 700  
–smenge 666, 678–680  
–spotenz 783  
–swandel 951  
Bedürfnis 216, 424, 701  
–, Anwendungs- 237  
–, Kommunikations- 632, 778  
–, konkurrierendes System- 330

- , kooperierendes System- 330
  - nach kommunikativer Effektivität 328
  - nach kommunikativer Effizienz 328
  - nach Vereinheitlichung der Benennung 237
  - , Performanz- 787
  - , System- 330, 631
  - , Variabilitäts- 237
  - Begriff 8
  - , komparativer (ordinalskalierter) 6, 579
  - , metrischer 7
  - , metrisierter 579
  - , qualitativer 6, 579
  - , quantitativer 5
  - , ratioskalierter (verhältnisskalierter) 7
  - sanalyse 538
  - sverband 538
  - Benutzbarkeit 778
  - Bequemlichkeit 145, 783
  - Beschreibung 12, 181, 183, 326, 423
  - , kontinuierliche 689
  - Bessel function of the second kind 400
  - Bestätigungsgrad 9
  - Betonung 34
  - sverteilung 52
  - Beziehung
  - , paradigmatische 216, 469
  - , semantische 432
  - smaß, diachrones 639
  - , syntagmatische 216, 469
  - bifurcation 418, 419, 421
  - Bifurkation
  - , Hopf- 693, 697
  - , qualitative 690
  - sdynamik 702
  - smenge 692
  - spunkt 694, 697
  - system 690
  - stheorie 689
  - bilabial nasals 136
  - Bimodalität 692
  - binary coding 116
  - Bistabilität 698
  - Block 443–444
  - , Text- 338
  - block, classificatory 758
  - , typological 756–757
  - borrowing 127
  - Brücke 443
  - Buchstabe
  - , englischer 962
  - , hebräischer 962
  - nhäufigkeit, Russisch 38
  - nstatistik 60
  - nzählung 16
  - butterfly 412
- C**
- CALL 897–906
  - catastrophe 410–411
  - theory 305, 410–421
  - category, syntactic 771
  - causality 274
  - causation 414
  - CELEX 243, 245, 247, 250
  - centrality, measure of 603, 604
  - Centrifuga* 31
  - centroid, document 976
  - chain, definition 447
  - change 413
  - , conscious 647
  - point 391
  - , reversible 282
  - , syntactic 274, 281–282
  - channel capacity 882
  - Chaos 694, 697
  - , deterministisches 689
  - forschung 423
  - theorie 688–703
  - chaos 761, 878, 881
  - theory 305
  - characterisation 305
  - characteristic, phonotactical 378
  - Charakteristikum, Stil- 327
  - Chlorophletenkarte 503
  - city-block metric 549
  - CKY algorithm 848–849
  - class, nominal 655
  - classification 118, 649
  - , hierarchic 456
  - , multidimensional 757
  - , pragmatic 369
  - clause
  - length 283
  - patterns 132
  - Clauselänge 333
  - Clique 444–445
  - cloze procedure 910–911
  - cluster
  - , analogical 417
  - analysis 92, 137, 139, 369, 380, 759
  - , metonymical 417
  - Clusteranalyse 333, 341, 586, 643
  - , hierarchisch-agglomerative 543–545
  - , hierarchische 341
  - clustering by similarity 417
  - clustering due to spatial relatedness 417
  - Code
  - , effizienter 220
  - , stenographischer 3
  - code, optimal meaning preserving 882–883
  - codimension 412
  - coding
  - need 310
  - requirement 311, 648
- coefficient
  - of loss 399
  - , average extra-cluster 752
  - , average intra-cluster 752, 755
  - , correlational 751
  - , Dice 979
  - , Fager and McGowan 979
  - , general medial 753
  - , generalized extra-cluster 754
  - , generalized inter-cluster 754
  - , generalized intra-cluster 754
  - , generalized language correlation 754
  - , generalized typological 754
  - , Kulczinsky 979
  - , loglike 979
  - , medial correlation 752
  - , medial extra-cluster 752
  - , medial intra-cluster 752
  - , normalized variation 315
  - , Ochiai 979
  - , tetrachoric 751
  - , typological correlation 755
  - , universal typological 754
  - , Yule 979
  - ,  $\phi^2$  979
  - coevolution 764
  - coherence 883, 886
  - , contextual 862
  - cohesion 359
  - cohesiveness 377
  - collocation 972, 977
  - colour terms 122, 371
  - combinability 308
  - combination, syntagmatic 972
  - communicative relevance 311
  - compactness, thematic 376
  - comparison 305
  - completeness of text 796
  - complex sentence, Czech 132
  - complex term 977–979
  - complexity 278, 562, 564, 569, 648–649, 727, 757, 763–764, 766, 770–771, 878–890, 882
  - , algorithmic 725, 727
  - , cultural 569
  - , effective (Gell-Mann) 883–885
  - , effective 717, 735
  - , functional 770
  - , graphic 770
  - , Kolmogorov 717, 727, 734
  - , morphological 250
  - of grammar 276–277
  - of syntactic construction 288,
  - , semantic 912
  - , syntactic 137, 275, 766
  - composition rule 292
  - compound 119, 418
  - , Japanese 88
  - phoneme 181
  - productivity 308

- comprehensibility 121, 305  
 –, measure of 909–912  
 concentration, degree of 376  
 concept 760  
 – formation 306  
 –, quantitative 306  
 condition, pathological 988  
 confluent hypergeometric function 655, 799  
 connection, lexical 374–375  
 connectionism 705  
 connectivity 734  
 –, network 716  
 connotation 649  
 consciousness 922  
 –, altered states 999  
 consonant  
 – clusters 137  
 – disharmony 197–198  
 constituency relation 770  
 constraint 881, 886  
 –, contextual 865, 874  
 –, grammatical 867  
 –, lexical 867  
 construct, supra-sentence 353  
 construction  
 – synonymy 308, 310–311  
 –, syntactic 770–771  
 content  
 – analysis 121  
 – word 388  
 context 354, 356  
 –, extra-linguistic 475  
 –-free grammar 292  
 – globalisation 310  
 –, immediate linguistic 475  
 –, larger 351, 359  
 –, narrower 351, 359  
 contrast 476  
 control cycle 648  
 conversion  
 –, grapheme-to-phoneme 931–935  
 –, phoneme-to-grapheme 931–935  
 co-occurrence 978  
 co-reference 356–358  
 corpus  
 –, Eindhoven 245  
 –, Greek 139  
 –, INL 250  
 –, Negra 288, 771–773  
 –, Penn-Helsinki 281  
 –, Polish 122  
 – size 308  
 –, Susanne 285–286, 288, 771–773  
 –, TOSCA 393  
 cosine measure 976  
 coupling  
 –, rhythmic 415  
 –, strong 419, 420  
 –, weak 419, 420  
 coverage 375  
 creation, document 923, 928  
 creativity 649  
 curve  
 –, logistic 282, 305  
 –, Tornquist 367  
 cusp 412–413, 421  
 cusum chart 394  
 C-value 982  
 CV-sequences 378  
 C-word 725–726, 734, 884–885  
 cycle  
 –, control 647  
 –, perceiving-acting 413
- D**
- Daktylus 48  
 Darstellungsfunktion, Bühlersche 426  
 data base, linguistic 923  
 data mining 971  
 Datenmatrix 499, 502, 504, 642–643  
 Dauer  
 –, Laut- 665, 667  
 –, Ton- 155  
 Dechiffrierung 16  
 decision tree 824, 827–829  
 Deduktion 13  
 definiteness 137  
 definition 994  
 – chain 308  
 Dekodierung 216, 217  
 –aufwand 144, 182, 216, 238, 330  
 Dendrogramm 341  
 Denköonomie 776  
 Denotat 433  
 Denotation  
 –s-Hreb 425  
 –sklasse 426  
 –sbreite 442  
 –skomponente 443  
 –ssystem 426  
 density, space 976  
 dependence 191  
 –, asymmetrical 567, 568  
 –, causal 751  
 –, construction frequency – complexity 773  
 –, frequency – availability for word formation 252  
 –, frequency – base frequency 250  
 –, frequency – form 252  
 –, frequency – length – complexity 288  
 –, frequency – length 250  
 –, frequency – meaning 251  
 –, functional 763  
 –, information – position 772  
 –, length – complexity 288  
 –, length – frequency 768  
 –, length – polysemy 308  
 –, length – position 289  
 –, noun frequency – preposition frequency 487  
 –, noun frequency – word length 487  
 –, noun length – abstractness level 912  
 –, noun length – terminological index 912  
 –, parts of speech 90  
 –, polysemy – frequency 769  
 –, position – complexity 289  
 –, position – information 289  
 –, proportion of nouns – sentence position 795  
 –, rank – frequency 989  
 –, semantic 353  
 –, symmetrical 567, 568  
 –, synonymy – polysemy 308  
 –, word frequency – word location 356  
 –, word length – lexicon size 310  
 –, word length – meaning size 794  
 –, word length – polysemy 124, 305  
 –, word length – size of the phonemic inventory 305  
 –, word length – word frequency 305  
 –, word length – word position 280  
 –, word order – word length 274  
 depth 771  
 – of contextual relationship 743  
 – of embedding 275, 288–289, 771, 773  
 Derivat 229, 952  
 Derivation 228, 951  
 description 760  
 Determinante 465  
 Determiniertheit 329  
 Determinismus 5, 325  
 Deutlichkeit 144, 145  
 development, abnormal 988  
 devil's staircase 362  
 dialectometry 308, 551, 552  
 dialects, Japanese 92  
 Dialektgrenze 510  
 Dialektizität 507  
 Dialektometrie 21, 498–531  
 Dialektzone 508  
 Diameter des Graphen 442–443  
 Dichtegrad 333  
 Differenz 330  
 Differenziertheit 779  
 Differenzmaß 186

- Diffusion 507  
 Diffusität 430  
 Diffusität, Gesamt- des Textes 430  
 digram 859  
 Dimension 699  
 dimension, fractionale 733  
 Dimension, fraktale 699  
 direct object position 280  
 Disambiguierung 459  
 discourse 881–884, 890  
 – analysis 471–495  
 discriminant analysis 369, 380, 389, 392  
 Diskretheit 329  
 Diskriminanzanalyse 333  
 Diskursanalyse 342, 433  
 disorder 410, 878, 889  
 –, speech 988  
 dispersion 306  
 Dispersion 99, 101–102  
 –skoeffizient 36, 37  
 Dissoziationstendenz 189  
 distance 390, 548–549  
 – matrix 552  
 – matrix, asymmetric 550  
 – matrix, incomplete 550  
 – measure 549  
 –, minimum editing 984  
 –, referential 473, 477, 480, 482–483, 495  
 Distanz (Abstand) 148, 331, 430, 501  
 –, attraktive 190  
 –, Euklidische 584  
 –, Hamming- 543  
 –, Levenshtein- 543  
 –, referentielle 342  
 –maß 536  
 –matrix, 536, 543–544, 584, 586  
 –messung 509  
 Distinktivität, Prinzip der maximalen 216  
 distribution  
 –, 1-displaced Cohen-binomial 288  
 –, 1-displaced Dacey-Poisson 165–166, 175–176, 178  
 –, 1-displaced Poisson 158–159, 163–165, 177  
 –, beta 795  
 –, bimodal 247  
 –, binomial 288, 398, 797  
 –, Bondesson 795  
 –, Čebanov-Fucks 159, 163  
 –, Cohen-binomial 773  
 –, combinatorial, 191  
 –, Conway-Maxwell-Poisson 651, 801  
 –, Dacey-Poisson 165  
 –, discrete lognormal 730  
 –, discrete Pareto 793  
 –, diversification 797  
 –, exponential 727–728, 793, 881  
 –, exponential word length 726  
 –, extended logarithmic 773  
 –, extended positive negative binomial 288  
 –, frequency 373, 751  
 –, Fucks' 121, 158  
 –, Fucks' binomial 159  
 –, Fucks' generalized Poisson 159–170, 177–179  
 –, Fucks-Gačevićladze 168–174, 177, 178  
 –, gamma 56, 121, 794  
 –, generalized (Consul) Poisson 179  
 –, generalized 652  
 –, generalized hypergeometric 799  
 –, generalized inverse Gauss-Poisson 245, 247, 400, 402–405  
 –, geometric 563, 650, 794, 797  
 –, Good 654  
 –, Hermite 653  
 –, Hirata-Poisson 653  
 –, hyperbinomial 201–202  
 –, hypergeometric 88  
 –, hyper-Pascal 288, 773, 799  
 –, hyper-Poisson 179, 655, 799  
 –, improper 293  
 –, inverse Gaussian 794  
 –, Johnson-Kotz 800  
 –, Katz family 797, 799  
 –, Kemp-Dacey hypergeometric family 799  
 –, Kemp-Kemp-Poisson 165  
 –, Lerch 796  
 –, lognormal 121, 247, 248, 286, 400, 403, 563, 717, 726–727, 730–731, 735, 881  
 –, Lotka 798  
 –, mixed 402  
 –, mixed Poisson 205  
 –, modified 652  
 –, multinomial 794  
 –, negative binomial 287, 388, 449, 452, 655, 797  
 –, negative hypergeometric 286, 287, 655, 800  
 –, normal 286, 563–564, 730, 732, 735  
 – of distances 797  
 – of inquiries 800,  
 – of length 200–201  
 – of lexeme width and height 794  
 – of meaning diversification 797  
 – of morphological productivity 800  
 – of phrase length 794  
 – of polysemy 307  
 – of sentence length 798–800  
 – of string length 739  
 – of syllable types 801  
 – of vowel duration 794, 795  
 – of word classes 801  
 – of word length 797–801  
 – of word repetitions 797  
 – of words in text passages 800  
 –, Orlov 796  
 –, Pareto 732, 793  
 –, partial sums 653  
 –, Pearson type III 794  
 –, Pearson type IX 793  
 –, Pearson Type V 793  
 –, Pearson Type X 793  
 –, Poisson 121, 159, 178–179, 286, 388–398, 652, 732, 797, 977  
 –, Pólya 121, 655  
 –, positional 191–194  
 –, positive binomial 650  
 –, positive negative binomial 650, 651  
 –, positive Poisson 650, 654  
 –, rank-frequency 646–647, 797  
 –, rank-frequency of phonemes 653  
 –, Rouault 798  
 –, Simon 800  
 –, steady-state 648  
 –, structural type 399  
 –, two dimensional binomial 801  
 –, two dimensional Conway-Maxwell-Poisson 801  
 –, two dimensional negative binomial 801  
 –, uniform 563, 741  
 –, Waring 288, 652, 772, 800  
 –, Waring-Herdan 373  
 –, Whitworth 722, 729  
 –, word frequency 397–408  
 –, word length 655, 726, 730  
 –, Yule 800  
 –, Yule-Simon 400–402, 404–405, 800  
 –, zeta 793  
 –, Zipf 793, 800  
 –, Zipf-Alekseev 351, 353–356, 358, 359, 730  
 –, Zipf-Estoup 793, 798  
 –, Zipfian 563  
 –, Zipfian family 400  
 Distribution  
 –, Phonem- 181–190  
 –sklasse 190  
 –smaß 185  
 disturbance 793  
 Divergenz 693  
 diversification  
 –, lexical 310  
 – process 646–656

- Diversifikation 147–148, 232, 262  
 –, der Wortarten 233–235  
 –, distributionelle 233  
 –, semantische 232–233  
 –skraft 4  
 –sprozess 231, 331  
 Diversität 587  
 diversity 371, 374, 598  
 –, lexical 992, 996, 998  
 –, linguistic 558  
 – value 556  
 document creation 923, 928  
 Dokumentationswesen 21  
*dol'nik* 76  
 dynamic programming 839  
 dynamics 761  
 –, non-linear 881  
 Dynamik 3, 19, 327, 688  
 –, des Systems 216  
 –, langsame 689  
 –, Maxwell- (thermodynamische) 693–694  
 –, perfect delay (konservative) 693  
 –, schnelle 690  
 –, Text- 4  
 Dynkin-Diagramm 693–695
- E**
- Early Immediate Constituent (EIC) 279–280, 604–605  
 ease theory 785  
 Ebene, hypertextuelle 344  
 Eckengrad 440–441  
 economisation  
 – of articulatory effort 763  
 – of memory 762  
 Effektivität 777  
 – des Transkriptionscodes 220  
 –, degressive 100–101  
 –sbedürfnis 328  
 efficiency 280  
 – need 310  
 – of grammar 276–279, 281, 282  
 Effizienz 777  
 –, Aufwand- 778–779, 784–785  
 –bedürfnis 328  
 – des Merkmalinventars 219–221  
 –, kommunikative 775–789  
 –, systematische 780  
 –, textuelle 780  
 effort  
 –, articulatory 306  
 –, processing 280  
 Eigenschaft 13, 662  
 –, distributionelle 186  
 –, distributionelle Phonem- 182–183  
 –, externe 181  
 –, interne 181–182  
 –, konkurrierende 326  
 –, kooperierende 326  
 –, metrische 340  
 –, stochastische 8  
 –, suprastilistische 339  
 Einfachheit 181  
 Einflussfaktor  
 –, Autor-bezogener 339  
 –, Diskurskontext-bezogener 339  
 –, objektiver 339  
 –, Sprachnorm-bezogener 339  
 –, subjektiver 339  
 Einheit  
 –, hypertextuelle 345  
 –, Rahmen- 181, 183  
 –, rhythmische 208–213, 256  
 Einmaligkeitsindex 333, 341, 343  
 embedding 275, 288–289, 771, 773  
 –, depth of 766  
 Endung  
 –, männliche 46  
 –, weibliche 46  
 enslaving principle 761  
 Entfaltung, universelle 692  
 Entfernung 441–442, 584  
 –, mittlere des Graphen 442  
 Entropie 4, 70, 76, 155–56, 217–222, 333, 593  
 –, Chinesisch 112  
 –gleichgewicht 219  
 –, paradigmatische 219  
 –, Schriftzeichen- 963–964  
 –, syntagmatische 217–219  
 entropy 116–117, 121, 131, 284, 308, 380, 712, 727, 735, 739, 761, 792, 794, 858–859, 862, 863, 875, 878–890  
 –, algorithmic 882–883, 885–886  
 –, Balasubrahmanyam-Narayan 884  
 –, conditional 859  
 –, degenerate 728, 882–883  
 –, Gell-Mann 878  
 –, Rényi 880  
 Entscheidung 10  
 Entwicklung 5, 7  
 environment 773  
 equilibrium 352, 410, 761–762  
 –, punctuated 362  
 –, thermodynamic 410  
 –, transient 410  
 equivalent, functional 765, 767, 771  
 Erbwort 642  
 Ergativsprache 587  
 Ergebnis, sprachliches 780  
 Erklärung 6–8, 10, 12–13, 19–20, 35, 143, 330, 596, 687  
 –, smechanismus 579  
 Ersetzungsprozess, unvollständiger 628  
 Erzeugendensystem 699  
 evaluation of terminology 972–974  
 evolution 410, 763  
 Expandierung 787  
 explanation 306, 348, 604, 646, 760–761, 764  
 –, deductive-nomological 765  
 –, functional 602, 762, 765  
 –, linguistic 760  
 exploitation  
 – of phonemes 194–195  
 – of types 204–205  
 Exponent 588  
 Exponententyp 588  
 Exponentialverteilung 149  
 Extension 780  
 extraction  
 –, information 925–926  
 –, keyword 974–975  
 –, knowledge 971  
 –, terminology 971–987  
 Extremtyp 579  
 Exzentrizität der Ecke 442  
 Exzess 155
- F**
- factor analysis 92, 133, 138, 369, 380, 487, 488, 548–549, 759  
 Faktorenanalyse 333, 586–587  
 Falte 693  
 familiarity 474  
 family 555  
 – tree 308  
 feature  
 –, distinctive of style 370  
 –, qualitative 751  
 –, sub-stylistic 369  
 –, supra-stylistic 369  
 feedback 762  
 Feigenbaum-Szenario 690  
 field 419  
 –, attracting 421  
 Flesch Reading Ease 914–915  
 Flexion 227  
 Fließgleichgewicht 700  
 fluctuation 761  
 –, micro semantic 417  
 –, random 647  
 –, stochastic 419  
 Fluktuation 689  
 focus 471  
 Folge 339  
 force 792–793, 801  
 –, macroscopic 410  
 form, canonical 191  
 Form, kanonische 952  
 Formalismus, russischer 27, 31

- Formenrecycling 233  
 forward-backward algorithm 293  
 Fraktal 693  
 frequency 306, 766–768, 770–771  
 frequency dictionary 307–308, 312–324  
 –, Czech 131  
 –, German 121  
 –, Japanese 83–85  
 –, Polish 121–122  
 –, Russian 121  
 –, Slovak 121  
 frequency  
 –, co-occurrence 978  
 –, inverse document 975  
 – of grammatical categories 118  
 –, of sentence 275  
 –, of syntactic construction 288  
 –, parts of speech 992  
 –, positional 193  
 –, rank-ordered 194–195  
 –, ratio of 981  
 – spectrum 398  
 –, surface 251  
 –, term 975  
 Frequenz 1, 3, 4, 20, 143, 330–331, 783–784, 787  
 –, distributionelle 189  
 –, Graphem- 966–967  
 –, Kollokations- 467  
 –, Konsonanten- 33  
 –, Konsonantentypen- 32  
 –, Laut- 98  
 –, Laut-, Russisch 25  
 –, Morph- 229, 231  
 –, Morphem- 228–229, 231  
 –, pragmatische 189  
 –, russische Affix- 55  
 –, russische Präpositionen- 55–56  
 –, russische Suffix- 55  
 –schwelle 144  
 –spektrum 226, 229, 268, 335  
 –, systemische 189  
 –, Vokal- 33  
 –, Wort- 17–18, 33–34, 55, 333, 341, 952  
 –, Wortarten- (Wortklassen-) 17, 55, 154, 953–954  
 –, Wortlängen- 17, 29, 51, 55  
 –verteilung, Wort- 34  
 –verteilung, Wort-, Chinesisch, 98  
 –verteilung, Wort-, Englisch, 98  
 –verteilung, Wort-, Latein, 98  
 Frequenzwörterbuch 16, 24, 70, 73–74  
 –, chinesisch 100–105, 948, 949, 952–953  
 –, englisch 21  
 –, französisch 21  
 –, russisch 21, 71  
 function  
 –, communicative 857  
 –, reflecting 857  
 –, syntactic 771  
 – word 387–388  
 Functional Grammar 277  
 functional  
 – load 130–131, 769  
 – sentence perspective 133, 600  
 functionalism 471  
 Fündigkeitswert, relativer 509  
 Funktion 3  
 –, emotionell-expressive der Sprache 458  
 –, konfluente hypergeometrische 258, 263  
 –, nominative der Sprache 458  
 –, Potenz- 335  
 Funktionalanalyse 150  
 Funktionalstil 960–961  
 Funktionskomplexität 966–967  
 Fusion 587, 589  
 fuzzy sets 305
- G**
- Ganzheit, semantische 458  
 Gebräuchlichkeit 952  
 Gedächtnis  
 –aufwand 238, 588  
 –trächtigkeit 778  
 Gefühlsbetontheit, Grad der 208  
 Geltungsökonomie 786  
 Genauigkeit 783  
 genre 137, 734  
 Genre 336, 340  
 genus 555–558  
 geometrische Reihe 41  
 Gesamtdiffusität des Textes 430  
 Gesamtgrad, relativer 441  
 Gesetz 2, 9, 12–13, 17, 153, 182, 209, 239, 256, 261, 423, 581, 587, 622, 687  
 –, allgemeines 12, 300  
 –, allgemeingültiges 1  
 – der großen Zahlen 11, 33, 36–37, 40  
 – der Sprachentwicklung 60  
 –, deterministisches 214, 222, 662  
 –, Frumkina- 338  
 –, Goebbl'sches 499  
 –, Laut- 12, 638  
 –, linguistisches 661  
 –, Lotka- 962  
 –, Menzerath(-Altmann)- 17, 20, 224, 238, 255, 261, 298, 302, 338–339, 432, 434, 460, 659–687, 957, 964–965, 968  
 –, Ohnos 235  
 –, Piotrowski- 627–633  
 –, Potenz- 149  
 –, Quantitäts- 660–661  
 –, Rang-Frequenz- 145, 147  
 –, Referenz- von Hřebiček 342  
 –, semiotisches Präferenz- 335  
 –, Sprach- 13, 271  
 –, statistisches 29  
 –, stilometrisches 37  
 –, stochastisches 1, 5–6, 327, 342, 662  
 –, Text- 326, 333, 335–339, 345  
 –, Zipf-Mandelbrot- 4, 11, 336, 337, 683, 961–963  
 –, Zipsches 1, 4, 70, 76, 99, 111, 145, 147, 150, 261, 335, 336, 343–344, 614–615, 666, 781  
 Gesetzmäßigkeit 11, 18–19, 43, 268  
 –, sprachliche 25  
 –, statistische 37, 76  
 Gewichtungsfunktion 344  
 givenness 474  
 – hierarchy 475, 478–479  
 Gleichgewicht 702, 778  
 –, Entropie- 219  
 –, Fließ- 700  
 –smodell 334  
 Gleichverteilung 148  
 Gliederung 339  
 glossomania 992  
 glottochronology 133, 309  
 Good's measure 120  
 Grad der Polysemie 1  
 Gradientensystem 689  
 grammar  
 –, context-free 292  
 –, generalized phrase structure 296  
 –, history-based 851–852  
 –, lexical-functional 296  
 –, lexicalized tree insertion 297  
 –, lexicalized tree-adjointing 297  
 –, link 296  
 –, phrase-structure 296  
 –, probabilistic 292–297  
 –, probabilistic context-free 848–850, 853–854  
 –, probabilistic dependency 296,  
 –, probabilistic feature 296  
 –, probabilistic tree 297  
 –, probabilistic unification 296  
 – statistics, Japanese 87  
 –, stochastic tree-substitution 297  
 –, universal 295  
 grammaticalisation 281  
 grammaticality, degree of 275,  
 Grammatikalisierungsprozess 701  
 Graph 437

- grapheme frequency, Czech 132  
 Graphem  
 –inventar 58  
 –statistik 24  
 –zahl 957–958  
 Greenbergs square-Methode 257  
 Grenzyklus  
 –, stabiler 696, 698  
 –verhalten 697  
 Größe 1  
 –, Inventar- 149, 215, 218, 948  
 –, Konstituenten- 659  
 –, Konstrukt- 659  
 –, Stichproben- 40, 70  
 growth curve 248  
 guessing  
 –, collective 860  
 –, individual 860  
 – test 995  
 Guiraud's *R* 405
- H**
- hallucinations, auditory 996  
 Hamming-Distanz 543  
 Handlung 777  
 Hapax legomena 229, 333  
 hapax legomena 244–245, 247–248, 364, 370, 375, 393, 944  
 Häufigkeit → Frequenz  
 Hayashi's theory 92  
 Hempel-Oppenheim-Schema 662  
 Hempel-Oppenheim-Schema 764  
 Herdan's *C* 406  
 Herdan's type-token curve 793  
 Herkunft, Morphem- 228  
 Hexameter 34  
 hexameter 746–747  
 hiatus 137  
 Hidden Markov Model 3, 138, 293, 814, 926–928, 933–934, 981  
 Hierarchie 424  
 –, grammatische 589  
 hierarchy 453, 569  
 –, implicational 568  
 Hiragana 935–945  
 – frequency 84, 90  
 Hit Ratio 492  
 homogeneity 247, 248, 307, 365, 598, 707  
 –, correlational 755  
 –, lexical 357,  
 –, marginal 198–199  
 Homogenität 11, 211–212, 259, 270–271, 337  
 –, stilistische 341  
 –sgrad 341  
 Homonymie 1, 458–459  
 homonymy 306–308  
 Homöoskedastizität 11  
 honeycomb method 92
- Hreb 426–428, 433–445  
 –, Daten- 428  
 –-Diffusität 431  
 –, Kern- 428–429  
 –, Listen- 428–429, 432–433, 435  
 –-Mächtigkeit 428  
 –, Mengen- 428, 440  
 –, Positions- 428, 430  
 Human Interest formula 914  
 Hurst index 748  
 hypergeometric function 201, 773  
 Hyperlexem 959  
 hyperonym 448–450  
 Hypertext 267  
 Hyponymie 426  
 Hypothese 19, 326  
 –, deduktive 9  
 –, linguistische 9  
 –, Skinners 332  
 –, stochastische 9  
 –, universale 13  
 Hypothesenbildung 17  
 –, deduktiv 6  
 –, induktiv 6  
 hypothesis 305  
 –, deductive 191  
 –, inductive, 191
- I**
- IBM* model 814–815  
 Idealtyp 579, 587  
 Identität 330, 424  
 –styp 534, 537  
 –swert, relativer 501  
 Ikonizität 787  
 immediate constituents 191  
 implication 418  
 independence 248  
 Indeterminismus 329  
 index 306, 364, 366, 753  
 –, absolute 754  
 –, Greenberg's typological 758  
 –, Hurst 748  
 –, lexical rarity 988  
 –, lexicological 306  
 –, mean length of utterance 988  
 –, number of different words 988  
 – of gravity, Mistrík's 375  
 – of lexical concentration, Guiraud's 375  
 – of liveliness 306  
 – of polysemy 306  
 – of productivity 244–245  
 – of rarity 910  
 –, Simpson's of diversity 374  
 –, standard frequency 316  
 Index 7, 32, 333  
 –, Analytizitäts- 333  
 –, Einmaligkeits- 333, 341, 343  
 –, globaler 333  
 –, Greenbergs 7  
 –, Konzentrations- 333, 341, 343  
 –, morphologischer 582, 584, 586  
 –, relativer Zentralitäts- 442–443  
 –, Synthese- 261  
 –, Type-Token- (TT-Modell, TT-Verhältnis, TT-Ratio) 333, 337–338, 343, 433  
 –, typologischer 7  
 –, zentraler 442  
 indexation 971, 974  
 Indexierung, Text- 18  
 indexing 305, 923, 925  
 Index-Retrieval-System 537–538  
 Induktion 13  
 Ineffektivität 784  
 –, systematische 781  
 –, textuelle 781  
 Ineffizienz 784  
 –, systematische 781  
 –, textuelle 781  
 infant vocabulary, Japanese  
 Inferenz 10  
 inflection, Polish 118  
 information 275, 284, 288, 308, 419, 712, 716, 725, 727, 734, 747–748, 770–772, 857, 878–890, 915–916  
 – content 728  
 –, connotative 858  
 –, encoding 368  
 –, extrinsic 414  
 – flow 361–362, 364  
 –, given 471  
 –, grammatical 858, 872  
 –, intrinsic 414  
 –, lexical 857  
 –, linguistically relevant 276  
 –, morphological 872  
 –, old 471,  
 –, potential 886  
 –, pragmatic 857–858  
 – retrieval 305  
 –, semantic 858, 860, 870  
 –, syntactic 858–860, 862, 866–867, 871, 873  
 –, sigmatic 858  
 –, structural 283–284  
 – theory 91, 116–117, 407, 727, 734, 739–741, 857–875  
 Information 685, 783–784  
 –, Struktur- 686  
 –, syntaktische 593  
 –sästhetik 156  
 –sfluss 1, 434  
 –sgehalt 76, 143, 217, 593, 963  
 –sprozess 433  
 –stheorie 4, 68, 70, 73, 76  
 –sverarbeitung 329, 683

- informativity 308  
 Inhaltstypologie 587  
 injuries, brain 988  
 inside probability 294,  
 inside-outside algorithm 293–  
 295  
 Instabilität 328, 691  
 instablity 410  
 Intension 780  
 Intensität der Kombinierbarkeit  
 466–467  
 intensity 308  
 intentionality 414  
 Intepretierbarkeit 330  
 interconnection 751  
 interdependence between struc-  
 ture and function 761  
 Interpretation 10  
 –, Prinzip der vollständigen 782  
 interpretation, semantic 360  
 interrelation 767  
 inter-sentence connection 377  
 Intervall 155  
 intonation 138, 988  
 Introspektion 5  
 invariance 248  
 Inventar 1  
 –, Graphem- 58, 948, 966  
 –größe 149, 215, 218, 948  
 –, Merkmal- 216–217  
 –, Morphem- 948  
 –, Phonem- 58, 214–216  
 inventory 310  
 –, morpheme 769  
 –, phoneme 769  
 –, phonemic 562  
 – size 306, 771  
 Inzidenz 440  
 irregular phonetic development  
 126  
 isogloss 92, 551  
 Isoglosse 509, 510, 533, 641  
 Isolation 589  
 isopleth-map 574  
 Isotopie des Textes 439  
 Isotopiekette 425, 439–440
- J**
- Jambus 30, 33, 35, 42–43, 48–  
 52, 616  
 Junggrammatiker 12, 25, 611
- K**
- Kanji 730, 935–945  
 – frequency 82–84, 90  
 kappa 197  
 Katakana 935–945  
 – frequency 84, 90  
 Katastrophe, generalisierte 693  
 –ntheorie 19, 329, 688–703  
 Kategorie, syntaktische 783  
 Kennwertsynopse 507  
 Kern 465  
 –-Hreb 432  
 –, Text- 428  
 Kette  
 –, nominative 425, 439  
 – semantischer Relationen 425  
 Klasse 579  
 –, agglutinierend 586  
 –, Äquivalenz- 331  
 –, Denotations- 426  
 –, flektierend 586  
 –, isolierend 586  
 –, Morphem- 949–951  
 –, Toleranz- 331  
 –, Wort- 340  
 Klassifikation 6, 8, 30, 40, 183,  
 189, 326, 327, 333, 339, 441,  
 498, 512, 532–533, 535–536,  
 544, 578, 580, 947  
 –, distributionelle 186, 188, 189  
 –, genetische 580  
 –, hierarchisch-agglomerative  
 511, 512  
 –, hierarchische 188, 579  
 –, Kreuz- 532  
 –, monovalente 580  
 –, polythetische 21, 188, 584,  
 586  
 –, Text- 341  
 Klimax 331  
 Klumpung 332, 343  
 –stendenz 182, 332  
 Knotenpunkt 697  
 –, stabiler 698  
 Knotenverhalten 697  
 knowledge base, linguistic 843,  
 923  
 Kodierungsbedürfnis 235  
 Koeffizient  
 – des Bedeutungszusammen-  
 hangs 367  
 –, Dispersions- 36–37  
 – von Bobrik 42  
 –, Vorkommens- 35  
 Kohärenz 328, 330, 342, 345,  
 424  
 –begriff 329  
 –, räumliche 511  
 –, Text- 439–440  
 Köhasion 345, 424, 436  
 –, grammatische 436  
 –smittel 424  
 –, positionale 436  
 –srelation 332  
 Köhler'scher Regelkreis 216,  
 227, 237, 255–256, 261  
 Köhler-Martináková's type-to-  
 ken curve 795  
 Köhlers Basismodell 965–968  
 Koidentität 502, 509  
 Koinzidenz 331, 436–437, 441,  
 444  
 –, positionale 436  
 –, quasi-deterministische 436  
 –, stochastische 436  
 Kollokat 465  
 Kollokation 952  
 –, habituelle 468  
 –sfrequenz 467  
 Kolon 45–46  
 –ende 46  
 Kolonlänge 45  
 Kombinierbarkeit  
 –, lexikalische 464, 469  
 –, Morphem- 228  
 –, Selektivität der 468–469  
 –, semantische 465  
 –, syntaktische 465  
 –weite des Wortes 465, 467  
 Kommunikation  
 –bedürfnis 632, 778  
 –sprozess 424, 445  
 –system 329  
 Kommunikativität 424  
 Kompaktheit, Text- 431  
 Kompensation 328  
 –sprozess 615  
 Kompetenz 780  
 Komplexität 1, 6, 225, 424, 593,  
 596, 690, 783–784, 786, 964,  
 966  
 –, artikulatorische 216  
 –, Bedeutungs- 700  
 –, Funktions- 966–967  
 –, graphische 948, 964,  
 966–968  
 –, Kommunikat- 780  
 –, morphologische 589, 593  
 –, Paradigmen- 593  
 –, Phonem- 216  
 –sgrad 327  
 Komponente, Denotations- 443  
 Komposition 227–228, 589,  
 951–952  
 Kompositum 236, 426, 665  
 Kompressionseffekt 659  
 Komprimierung 787  
 Kondensation, Text- 781, 785  
 Kondensierungsprozess 589  
 konfluente hypergeometrische  
 Funktion 258, 263  
 Kongruenz, semantische 464  
 Konkordanz 18  
 Konkurrenz 328  
 Konnektivität 342  
 Konnexität 432  
 Konnotativität 440  
 Konsonant-/Vokal-Verhältnis 56  
 Konsonantenreduktion 665  
 Konstituentengröße 659  
 Konstrukt  
 –größe 659  
 –, syntaktisches 1

- , typologisches 584
- Konstruktion
  - smechanismus 584
  - sprinzip 586
- Kontext 459
  - , formaler 538
  - , lexikalischer 465
  - sensitivität 327
  - , stabiler 466, 468
  - , syntaktischer 465
  - , variabler 466
- Kontextualität 1, 433, 700
- Kontinuierlichkeit 335
- Kontinuität 425
- Kontrastminimum 182
- Konversion 233
- Konzentration 780
  - , konnotative 440–441
  - sindex 333, 341, 343
  - smaß, Herfindahlsches 429
- Konzentriertheit 429
  - des Gesamttextes 429
  - des Kerns 429–430
  - des Textes 430
- Kookkurrenz 330–331, 436, 464–468
- Kooperation 328
  - sprinzip, kommunikatives 784
- Koreferenz 424
- Korrelation 6, 8
- Korrelationsanalyse 71
- Kraft, Zipfsche 301, 330, 362
- Kreativität 329
- Kreisprozess 694–695
- Kreuzklassifikation 532
- Kriterium, Ord'sches 211–212, 258–259, 270–271
- Kurtosis 155
- Kürzungstendenz 662
- Kuspe 692, 694, 702
- Kybernetik 74–77
  
- L
- Länge 1, 11, 20, 330–331, 783, 784
  - , Clause- 333
  - , Kolon- 45
  - , Morph- 20, 232, 255–259, 300
  - , Morphem- 223–225, 228
  - , Phrasen- 17, 665
  - , Satz- 17, 20, 44, 153–154, 209, 213, 256, 298, 333–334, 339, 343, 665, 668, 684, 959, 961
  - , Segment- 331
  - , Silben- 20, 208, 213, 256, 665, 669–670
  - , Teilsatz- 665
  - , Wort- 14, 16–17, 20, 22, 33, 51, 60, 144, 153–155, 208–209, 213–214, 222–223, 256, 259–271, 339, 343, 460, 665, 667–669, 672–673, 678–680, 684, 700, 947, 959–961
- language
  - , Accadian 313
  - , actual 557, 558
  - acquisition 138, 897–908
  - , Adigeh 864, 875
  - , Afrikaans 191, 198–199
  - , agglutinative 867
  - , Akan 493
  - , Amharic 477, 493
  - , analytical 747, 870–871, 874
  - , Ancient Armenian 313
  - , Ancient Greek 313
  - , Ancient Russian 313
  - , Ancient Turkic 313
  - , Angkola-Batak 197–199
  - , Arabic 127, 164–168, 173–174, 177–178, 191, 198–199, 313, 754, 757–759
  - , Armenian 313, 754, 757–758, 864
  - , Armenian-Polovian 313
  - , Austronesian 196–199, 205
  - , Azerbaijanian 864
  - , Aztecan 566
  - , Bantu 556
  - , Bare'e 197–199
  - , Bashkir 313
  - , Basque 313
  - , Bella Coola 477
  - , Belorussian 313
  - , Bengali 313, 493
  - , best 376
  - , Bulgarian 313, 493, 574, 863, 870
  - , Burmese 753
  - , Buryat
  - , Canary 313
  - , Catalan 313, 493
  - , Cayuga 278
  - , Chamorro 477, 480
  - change 92, 481, 558–559, 711, 762
  - , Chinese 313, 478, 479, 481, 494–495, 717–720, 722, 747, 753–755, 757–759, 885, 937–945
  - , Chorti 481, 605
  - , Chukchee 753
  - , Croatian 313
  - , Czech 129–134, 204, 274, 280, 313, 356, 376–378, 652, 863
  - , Dacian-Roman 313
  - , Danish 313, 574
  - , Dutch 245, 247, 249–251, 313, 403, 710
  - , Dyrbal 483
  - , English 133, 136–138, 164–168, 173–174, 178, 192, 243, 245, 247–248, 277, 280, 282, 289, 308, 313, 315, 356–357, 371, 376–378, 380, 389, 413, 420–421, 472, 474, 478–479, 485, 488–489, 492–495, 551, 706, 709–711, 717–723, 725, 730, 734, 740, 748, 752–755, 757–758, 772, 860, 863, 865–866, 868, 869, 871–875, 881, 885, 916, 1000
  - , English, American 718–719, 722
  - , Esperanto 164–168, 173–174, 177–178
  - , Estonian 274, 313, 376, 493, 724, 864, 870–871
  - , Filipino 388
  - , Finnish 274, 280, 313, 493, 552, 711–713, 715
  - , French 120–121, 274, 281–282, 308, 313, 315, 448, 653, 717, 748, 753, 757–758, 863, 865, 868, 870–874
  - , fusional 747
  - , Georgian 168, 313, 999
  - , German 117, 133, 137, 164–168, 173–174, 178, 191–192, 245, 249, 274, 280, 288, 313, 351, 353, 420, 448–450, 452, 493, 551, 574, 650–651, 710, 717, 730, 753–754, 757–758, 769, 771, 863, 868, 875
  - , Germanic 126, 281, 493, 555, 557, 754
  - , Gothic 313
  - , Greek 136–139, 164–168, 173–174, 177–178, 274, 280–281, 370, 717, 746, 747
  - , Gujarati 313
  - , Hanunoo 196–199
  - , Hawaiian 197–199
  - , Hebrew 313, 481, 909
  - , Hebrew, Biblical 472, 477, 480–481, 494–495, 605
  - , Hindi 313, 493, 723, 725, 753
  - , Hungarian 192, 196, 202–203, 313, 376, 378
  - , Icelandic 313
  - , Indian 722, 734, 885
  - , Indo-European 281, 486, 493–494, 555–556, 569, 753–754, 866
  - , Indonesian 191, 193–194, 197, 199, 201–205, 313, 493, 753–754, 757–759
  - , inflectional 867, 870, 873
  - , Irish English 282
  - , Isekiri 493
  - , Italian 274, 313, 652, 747, 748, 874
  - , Japanese 164–168, 173, 177–178, 274, 276, 313, 471, 478–479, 710, 753–755, 757–758, 935–945

- , Javanese 191, 493
- , Kammu 493
- , Kannada 723, 725
- , Kara-Kalpak 313
- , Kazakh 313, 864, 868–871
- , Khmer 753
- , Kikongo 276
- , Kirghiz 313, 999
- , Korean 313, 753
- , Koyukon 483
- , Kutenai 483, 489–490, 494
- , Latin 164–168, 173–174, 177–178, 274, 280–282, 313, 378, 389, 719–720, 722, 741, 746–747, 885
- , Latvian 313, 376
- , Limouzi 493
- , Lithuanian 313, 376
- , Macassarese 313, 493
- , Malay 313, 472
- , Malayalam 723, 725
- , Maltese 493,
- , Manchurian 753
- , Maori 493
- , Marathi 313, 723, 725
- , Middle English 281, 388
- , Moldavian 313
- , Mongolean 753
- , monkey 726, 727, 733, 881
- , Nez Perce 483
- , Niger-Kordofanian 556
- , Norwegian 274, 313, 717
- , Old English 281
- , Old French 281–282
- , Papago 600, 605
- , Papua 313
- , Persian 127, 313, 753
- , Philippine 482
- , Polish 115–129, 175, 313, 378, 390, 448–450, 454, 744–748, 863
- , Polynesian 206, 274, 281, 377
- , Portuguese 282, 313
- , possible 557, 558
- , Punjabi 493
- , Pushtu 313
- , Romance 126, 493, 555, 557, 652, 754, 873–875
- , Rumanian 313, 481, 552, 605, 864, 868–869, 871–875
- , Russian 124, 133, 164–168, 173–174, 177, 192, 313, 315–316, 376, 378–379, 717–720, 722, 745–746, 753–754, 757–759, 863, 865, 867–875, 885, 915, 990–1000
- , Sanskrit 717, 753
- , Slavic 192, 204, 206, 493, 754
- , Slovak 192, 313
- , Soddó 486
- , Spanish 313, 420–421, 477, 480–481, 485, 493, 605, 710, 864, 871, 874, 915
- , Sundanese 197–199, 313, 493
- , Swedish 313, 379, 493, 551, 717
- , synthetic 747, 869–870, 873
- , Tagalog 313, 482
- , Tahitian 197–199
- , Tajik 313
- , Tamil 493, 723, 725, 730
- , Telugu 723, 725, 753
- , Thai 493, 551, 753
- , Tibetan 753
- , Tuamotu 197–199
- , Tunisian 493
- , Turkic 866
- , Turkish 133, 164–168, 173–174, 177–178, 313, 351–356, 551, 753–754, 757–758
- , Turkmen 313
- , Tzotzil 481, 605
- , Ukrainian 313, 315–316
- , Urdu 313, 493, 753
- , Ute 480, 605
- , Uzbek 313, 864, 868
- variety 137
- , Vietnamese 313, 753
- , Wolof 493
- , Yiddish 313
- , Yoruba 493
- Large Number of Rare Events (= LNRE) 88, 247–248
- Laut
  - dauer 665, 667
  - frequenz 98
  - frequenz, Russisch 25
  - gesetz 12, 638
  - periode 44
  - statistik 24, 25–26, 56
  - wandel 144, 702
  - wandel, unregelmäßiger 614–621
  - zeichenstring 537, 543
- law 275, 650, 760, 764–765
  - , allometric 792
  - , Beöthy's 122, 125–126, 646
  - , Bradford's 731–732, 883
  - , causal 765
  - , cumulative modified power 716, 722–723, 725, 728–729, 733
  - , deterministic 764
  - , diachronic 559
  - formula 650
  - , Frumkina's 286–287, 797–798
  - , Gibbs' 410
  - , Goebel's 646
  - , Herdan's 88
  - hypothesis 648
  - , Kabashima's 90
  - , Krylov's 122, 124, 797
  - , linguistic 743, 791
  - , Lotka's 731
- , Mandelbrot's 88
- , Martin's 308, 447, 646
- , Martin's first 448
- , Martin's second 448–449
- , Menzerath's 122–123, 200, 203–204, 206, 559, 650, 652, 792–795
- , Menzerath-Altmann 133, 274, 282–285, 308, 348–360
- , Mizutani's 88
- , modified power 716, 718, 721–722, 725, 728, 731, 735
- of growing members 280
- of polysemy 795, 800
- of synonymy 797
- of vocabulary growth 793
- , Ohno's 90, 306
- , phenomenological 283
- , Piotrovskij 282, 309
- , Poisson 374
- , power 716–738
- , representational 283
- , Shibuya's 88
- , stochastic 764
- , universal 306, 760
- , universal linguistic 741
- , Yule's 88
- , Zipf's 88, 121–123, 131, 139, 309–310, 400–401, 406, 716–718, 721, 726, 728, 731–733, 735, 772, 793, 798, 881, 883, 885
- , Zipf-Alekseev 651
- , Zipf-Mandelbrot 288, 307, 401, 406, 646, 651, 724, 726, 792, 795–796, 989, 996–998
- learning theory, statistical 897–899
- left orientation, measure of 604
- leftmost derivation 292–293
- Lehnübersetzung 951
- length 306, 766, 770, 773
  - difference 280
  - , clause 283
  - of syntactic construction 288,
  - of syntactic unit 275
  - of verse 745
- , sound 988
- , syllable 988
- Lesbarkeit 298, 343
- Leseschwierigkeit 33
- letter frequency 722
- level
  - , language 359
  - , supra-sentence 359
- Levenshtein-Distanz 543
- lexeme net 308
- lexical
  - cohesion 121
  - content 293
  - richness 120, 376
- lexicalisation 310

- lexicon size 310, 765, 767, 769  
 Lexik-Modell 20  
 Lexikonumfang 14, 783–784  
 Lexikostatistik 511, 641  
 linear predicted coding 837  
 Linearität 329  
 linguistics  
 –, engineering 320  
 –, functional 129  
 –, relativity 138  
 linguistics, synergetic 133, 288, 308–311, 647, 655, 760–773, 796  
 Linguistik  
 –, synergetische 330, 587, 629, 781  
 –, Zipf'sche 4  
*Linguostatistik* 24  
 LNRE 399–403  
 – mixture model 402  
 –, adjusted 403–404  
 local tree 292  
 logistic curve 282, 305  
 loss, coefficient of 399  
 loudness 988  
 low-frequency words 944
- M**
- machine  
 – learning 821–830  
 – translation 812–818, 923  
 macroevolution 418  
 macrostate 880  
 Makrostruktur 437–438  
 map, semantic 560–561  
 mapping, structurally stable 411  
 Markov  
 – chain 740–741  
 –Kette 3, 326–327, 332  
 – model 407, 811, 839–840  
 Marrisimus 60–61, 66  
 Maschinelle Übersetzung 71–74  
 Maß  
 –, Ähnlichkeits- 186, 344, 512, 536, 635–637  
 –, Assoziations- 636  
 – der Aggressivität 185  
 – der Assoziativität 185  
 – der Attraktivität 185  
 – der Gleichmäßigkeit der Merkmalsausnutzung 251  
 – der konnotativen Konzentration 441  
 – der lexikalische Konzentration 337  
 – der modellinternen Aggressivität 185, 186  
 – der modellinternen Attraktivität 185, 186  
 – der Reflexivität 185  
 – der Symmetrie 185  
 – der totalen Assoziativität 188  
 – der totalen Reflexivität 188  
 – der totalen Symmetrie 188  
 – des Vokabularreichtums 435  
 –, diachrones Beziehungs- 639  
 –, Distanz- 536  
 –, Distributions- 185  
 –, Herfindahlsches Konzentrations- 429  
 –, relatives Zusammenhangs- 441  
 –, totales distributionelles 188  
 –, Wahrscheinlichkeits- 637–638  
 Maximierung des Rezeptionsergebnisses 778  
 maximize compactness 288  
 Maximum an sprachlicher Effektivität 778  
 meaning  
 –, energetic 752, 756  
 –, informational 752, 756  
 –, ontological 752, 756  
 –, operative 756  
 –, processive 756  
 measure 306  
 –, distance 549  
 –, Good's 120  
 – of comprehensibility 909–912  
 – of importance 983  
 – of occupancy 204  
 – of organization 857  
 – of semantic affinity 456  
 – of syntheticism 764  
 –, cosine 976  
 –, similarity 563  
 measurement 306, 352  
 mechanism 365, 648, 764  
 Mechanismus 7, 13, 659  
 Median, des Graphen 442  
 mediator, instrumental 414  
 Mehrdeutigkeit 1  
 melody 999  
 mental lexicon 253  
 Merkmal  
 –, distinktives 216  
 –inventar 216–217  
 –, Stil- 340  
 –vektor 499  
 message 879  
 Messen, Messung 2, 326, 499  
 Messpunktvektor 499  
 Messung, Ähnlichkeits- 504  
 Messvorschrift 7  
 method, Köhler-Galle 362  
 Methode  
 –, deduktive 10  
 –, induktive 10  
 Metrisierung 7  
 microstate 880  
 Mini/Max-Prinzip 778  
 minimal description length 295  
 minimalist program 779, 781–782  
 Minimalwortschatz 21  
 Minimierung  
 – des Artikulationsaufwands 216  
 – des Dekodierungsaufwands 144, 216, 330  
 – des Gedächtnisaufwands 238  
 – des Produktionsaufwands 144, 330  
 minimization of  
 – domains 288  
 – forms 288  
 – memory effort 289  
 – production effort 288  
 – structural information 289  
 Minimum an sprachlichem Aufwand 778  
 model  
 –, 2-Poisson 977  
 – building 306  
 – diagnostics 743  
 – of lexical change 309  
 –, explanatory 310  
 –, functional-analytic 274  
 –, Markov 407, 811, 839–840  
 –, N-Gram 981,  
 –, power 406–408  
 –, sequential 358  
 –, two exponential 732, 734  
 –, urn 398  
 modeling, analogical 705–714  
 Modell 9, 10  
 –, deterministisches 8  
 –, funktionalanalytisches 20  
 –, Prozess- 334  
 –, rekursives 3  
 –, statistisches 9  
 –, synergetisches 334, 689, 760–773  
 –, Textrepräsentations- 331  
 Modellbildung 9  
 –, deterministische 689  
 modification  
 –, ad-hoc 647  
 –, permanent 648  
 – ratio 912  
 Monosyllabismus 959  
 Morph 227–228  
 Morphem 227–228  
 –, derivative Produktivität 228  
 –, Diskurseigenschaften 228  
 –, freies 228  
 –, gebundenes 228  
 –, geographische Diversifikation 228  
 –, Grad der Schriftsprachlichkeit 228  
 –, grammatisches 228  
 –, kompositionelle Produktivität 228  
 –, konnotative Potenz 228

–, lexikalisches 228  
 –, soziale Diversifikation 228  
 –, Zugehörigkeit zum Flexionsparadigmen 228  
 – alter 228  
 morpheme inventory 769  
 Morphem  
 –frequenz 228–229  
 –frequenz im Lexikon 231  
 –grenze 222  
 –herkunft 228  
 –klasse 949–951  
 –kombinabilität 228  
 –länge 223–225, 228  
 –polysemie 228  
 –polytextie 228  
 –synonymie 228,  
 Morph  
 –frequenz 229  
 –häufigkeit im Lexikon 231  
 –länge 20, 232, 255–259, 300  
 Morphologie, archetypische 694  
 morphotactics 769  
 Motiv 41–42  
 multidimensional scaling 116  
 Multidimensionale Skalierung 642  
 Multidimensionalität 424  
 multifunctionality 771  
 multivariate analysis 92  
 Muster  
 –, konzeptuelles 425  
 –, semantisches 425  
 mutation, 762–763  
 mutual information 979

## N

Nachfolgerphonem 183  
 Nähe, lexikalische 341  
 Natürlichkeitstheorie 12  
 need → requirement  
 needs, system 310  
 negation in French 281  
 network 732, 734  
 –, convergent lexical 451  
 –, divergent lexical 451  
 –, lexical 447–458  
 –, neural 392, 705, 825, 934  
 –, notional 453–454  
 –, random 732  
 –, scale free 732  
 neural network 392, 825, 934  
 neurolinguistics 891–895  
 N-gram model 811, 941  
 N-Gramm-Modell 962  
 Nichtattraktivität 187  
 nominality, degree of 377  
 nomination 992  
 Nominativsprache 587  
 Norm 31, 34  
 norm, neurophysiological 988

normalization, terminology 973  
 normalized variation coefficient 315  
 Normalverteilung 11, 583  
 Notwendigkeit 5  
 nouns, frequency of 376  
 NP, evoked 475–476  
 NP, inferable 475–476  
 NP, new 475–476  
 Nullisokline 696  
 number of phonemes 310

## O

observation 760  
 occupancy  
 – function 204  
 – measure 204  
 Ökonomie 14  
 –, Denk- 776  
 –, formale 588  
 –, Geltungs- 786  
 –, informationsbezogene 786  
 –, Paradigmen- 587–588  
 –prinzip 782  
 –, sprachliche 775–789  
 –, systembezogene 786  
 Ökonomisierungsprinzip 683  
 Ontogenese 329  
 Operationalisierung 7  
 operator, communicative-pragmatic 992, 995, 998  
 operator-operand deviation 278  
 optimality theory 781  
 Optimierung  
 – des Belastungsverhältnisses 787  
 –, partikulare 787  
 –, relative 787  
 optimization 779  
 Ord's system 798  
 order 410, 889  
 – of syntactic units 275,  
 – parameter 761–762, 773, 883, 886  
 –, degree of 761  
 –, sequential 883  
 orderliness 598  
 Ordnung 6, 7  
 – des Graphen 440  
 –, chronologische 340  
 –smuster, räumliches 512  
 –sparameter 20, 330, 334  
 –sstruktur 507  
 Ord'sches Kriterium 211–212, 258–259, 270–271  
 organization 886  
 – of text 859, 862  
 organs, articulatory 836  
 origin 307  
 outside  
 – algorithm 294  
 – probability 294

## P

Paarreim 33  
 Paradigmenkomplexität 593  
 Paradigmenökonomie 587–588  
 paragrammatism 894  
 parsing 847–855  
 –, data-oriented 827, 854–855  
 part of speech 275, 307–308, 910, 935  
 parts of speech, Japanese 90  
 Performanzbedürfnis 787  
 Periode, Laut- 44  
 Periodizität 331  
 Peripherie des Textes 428  
 persistence, topic 473, 477, 480, 482–483, 495  
 Persistenz, thematische 342  
 phase 410  
 phase rule 410  
 Philologie, dynamische 147, 148  
 Phonem  
 –distribution 181–190  
 –, Nachfolger- 183  
 –, Vorgänger- 183  
 phoneme  
 – combinations, Czech 132  
 – frequency 191, 652, 722  
 – frequency, Czech 132  
 – frequency, Japanese 83  
 – frequency, Polish 116–118  
 – inventory 769  
 – number 310, 767  
 Phonemeigenschaft, distributive 182–183  
 Phonem-Graphem-Verhältnis 58  
 Phoneminventar 58, 214–216  
 –, Vereinfachung 216  
 Phonem  
 –komplexität 216  
 –statistik 60  
 –system 181  
 –zahl 14, 783–784  
 phonetic development 126  
 Phonetikum 947  
 Phonetizität 948  
 Phonometrie 17, 147  
 phrase length 121, 765, 769  
 Phrasenbildung 444  
 Phrasenlänge 17, 665  
 Phraseologismus 461  
 phrasing 999  
 Phylognese 329  
 phylum 555  
 Plan, diskursiver 437  
 point  
 –, cusp 411  
 –, fold 411  
 –, regular 411  
 polyfunctionality 649, 770  
 Polyfunktionalität 783, 784  
 Polylexie 20, 236, 460, 784, 965, 968

- polylexy 122  
 Polysemie 1, 7, 10–11, 426,  
     458–463, 701, 959  
 –, lexikalische 359, 458  
 –, Morphem- 228  
 –potential 236  
 –stufe 462–463  
 –-Verteilung 461–462  
 polysemy 124, 126, 306, 308,  
     310–311, 649, 764, 766–770  
 Polytextie 11, 20, 783–784, 965,  
     968  
 –, Morphem- 228  
 polytextuality 311, 649, 766–769  
 POS tagging 810–812  
 position 766, 771, 773  
 –, direct object 280  
 –, of syntactic construction 288  
 Position 784  
 –, Wort- 667  
 Potenzfunktion 335  
 power function 280  
 power law 350, 793  
 Prädikativität 584  
 –, externe 586  
 –, interne 586  
 Präferenzgesetz, semiotisches  
     335  
 Prager Schule 432  
 Prague School 130, 471  
 predicate alert 417  
 predication 419, 992  
 predictability, lexical 867  
 prediction 117  
 principal component analysis  
     249, 388–389, 393  
 principle  
 – of cross-category harmony  
     278  
 – of depth saving 289  
 – of domain minimization 279  
 – of least effort 279, 762, 792  
 – of model-independence  
     275–276  
 Prinzip  
 – der Aufwandökonomie 785  
 – der geringsten Anstrengung  
     4, 143, 147, 216, 232, 458,  
     682, 778–779, 781  
 – der Häufigkeit 143  
 – der maximalen Distinktivität  
     216  
 – der relativen Häufigkeit 145,  
     146  
 – der Verzögerung 782  
 – der vollständigen Interpreta-  
     tion 782  
 – des letzten Auswegs 782  
 –, Reinjektions- 697–698  
 –, Relevanz- 594  
 –, Selbstsucht- 782  
 probabilistic context-free gram-  
     mar 292  
 probability model 292  
 process 769  
 –, anamorphic 648  
 –, Bernoulli-Markov 726  
 –, birth-and-death 201, 408,  
     647, 654–655  
 –, communication 857  
 –, competing 761  
 –, context centralising 311  
 –, context globalising 311  
 –, cooperative 761  
 –, katamorphic 648  
 –, Markov 869  
 –, morpholytic 648  
 –, morphostatic 648  
 –, morphotransformatory 648  
 – of context-centralising 767  
 – of context-globalising 767  
 – of lexical change 309  
 –, stochastic 364, 740  
 –, Zipfian 646  
 processing  
 process, natural language 808–  
     818, 821–830, 834–847  
 process, speech 834–847  
 productivity 308  
 –, category-conditioned degree  
     of 244, 250, 252  
 –, degree of 249–250  
 –, index of 244–245  
 –, morphological 243–253  
 Produktion, Text- 326–327, 334  
 –aufwand 98, 144, 330  
 Produktivität 229  
 Produktivität  
 –, derivative 228  
 –, kompositionelle 228  
 –, morphologische 231, 950  
 –, Prozedur- 231  
 – von Wurzelmorphemen 55  
 Produzierbarkeit, 326  
 Profil, lexikalisches 340  
 Profilverktor 584  
 Progression, thematische  
     431–432  
 pronominalization 475  
 pronunciation 931–935  
 property 191  
 –, quantitative 276  
 –, syntactic 275–276  
 Prototypensemantik 784  
 Prototypentheorie 781  
 proximity, genetic 308  
 Prozedur-Produktivität 231  
 Prozess 3, 330  
 –, anaphorischer 702  
 –begriff 327  
 – der Textproduktion 325  
 – der Textrezeption 325  
 –, deterministischer 147  
 –, Geburts- und Todes-  
     231–232, 499  
 –, homöorhetischer 328  
 –, homöostatischer 328  
 –, kataphorischer 702  
 –, konkurrierender 20, 329  
 –, kooperativer 20, 329  
 –modell 334  
 –, morphogenetischer 328  
 –, probabilistischer 327  
 –, stochastischer 326  
 –, synergetischer 330  
 –, Textproduktions- 330  
 –, zyklischer 696  
 psychiatry 988–1000  
 Punktmenge, fraktale 698  
 Pyrrhichie 28
- Q**  
 Q-Analyse 501  
 QSUM chart 394  
 quantification 306  
 Quantifizierung 7, 326  
 Quantitätsgesetz 660–661  
 Quotient, RC- 593  
 Quotientenbildung 333
- R**  
 Radius des Graphen 442–443  
 Rahmeneinheit 181, 183  
 Rang 18, 153  
 Rangähnlichkeitsverteilung 344  
 Rang-Frequenz 229, 954  
 –-Verteilung 148, 231, 335, 435  
 Rangzahl 4  
 rank 126, 307  
 – distribution 792  
 – frequency 724  
 – number 356  
 rare vocabulary 121  
 rarity, index of 910  
 ratio, association 979  
 Raum, semantischer 425  
 Raumstruktur 499  
 RC-Quotient 593  
 reaction time 138  
 readability 377  
 – formula 909–910, 913–915  
 – measure 910  
 reading motivation 913  
 Realisierung, optimale 787  
 recall  
 –, text 998  
 –, word 995  
 recognition  
 –, language 924  
 –, speech 836–846  
 –, word 839–841  
 reduction, lexical 310  
 Reduktionsverfahren 537  
 redundancy 117, 131, 194, 308,  
     310, 740, 767, 769, 862–863,

- 873, 867, 879, 882, 885–886, 989
- Redundanz 4, 144, 217–222, 255, 683
- freiheit des Transkriptionscodes 220
- , lexikalische 337
- , Merkmals- 219–221
- , paradigmatische 219
- , relative 215
- , syntagmatische 217–219
- , textuelle 785
- Reduplikation
- , partielle 665
- , volle 665
- Referenzstruktur 338
- reflection 857
- Reflexivität, totale
- reflexivity 198
- Regel 661
- begriff 327
- Regelkreis 424, 700
- , Köhlerscher 216, 227, 237, 255–256, 261
- , kybernetischer 328
- Regelzusammenhang, deterministischer 326
- Register 336, 340
- Regularität 335
- , stochastische 425
- Reichtum, rhythmischer 43
- Reim 49, 53, 331
- Reinjektionsprinzip 697, 698
- Rekonstruktion 70
- Relation 426
- , distributionelle 182–183
- , funktionelle 182–183
- , heterogene 331
- , homogene 331
- , logische 501
- relation 760
- , frequency – irregularity 50
- , average word length – clause length 274
- , causal 760
- , contextual 354
- , genus-differentia 994
- of combination 279
- of dependency 279
- , paradigmatic 739
- , part-whole 994
- , polysemy – word length 307
- , semantic 252
- , size of syllables, word, sentences 569
- , structural 761
- , syntagmatic 739
- , verb tenses – verb-adverb combinations 274
- relationship
- , causal 765
- , contextual 740
- , spatial 551
- relevance
- , communicative 311
- , term 976
- Relevanzprinzip 594
- reliability 370
- repeat rate 390, 563
- Repellor 693–694
- repetition 362
- , degree of 357
- , word 996–998
- Repetitionsstruktur 345
- Repetitivität 424
- Repräsentativität 10
- representativity 307
- requirement 769
- , adaptation 766
- , application 766, 768
- , coding 310–311, 648, 766–767
- , coding efficiency 766
- , context economy 766
- , context specificity 766
- , control-level 766
- , de-specification 766
- , economy 766
- , efficiency 310
- , flexibility of expression-meaning-relation 766, 768
- , invariance of expression-meaning-relation 766, 768
- , language-constitutive 766
- , language-forming 766
- , limitation of embedding depth 766
- , minimisation of inventories 766
- , minimisation of structural information 766
- of coding effort minimisation 310, 648
- of complexity maximisation 766
- of context economy 648
- of context specificity 648
- of decoding effort minimisation 310, 648, 762–763, 766
- of encoding effort minimisation 766
- of flexibility 311
- of invariance vs. flexibility of the relation between expression and meaning 648
- of inventory minimisation 648
- of memory effort minimisation 762–763, 766
- of production effort minimisation 310, 648, 762–763, 766
- of redundancy 310
- of specification 310
- , preference of right branching 766
- , specification 766
- s, Köhlerian 648
- , stability 766
- , system external 773
- , transmission security 766
- restriction, phonological 310
- retrieval 305
- Reutlinger Raster 909
- Rezeption, Text- 327
- Rezipierbarkeit 326
- rhyme 378, 390
- rhythm 117, 133, 365, 413
- rhythmische Einheit
- , Häufigkeitsverteilung 209
- , Länge 208–213
- , Sequenzen 213
- Rhythmischer Kreis* 31
- Rhythmus 28–30, 32, 40, 43, 218
- , Akzent- 584
- , Prosa- 44–46
- , Silben- 584
- , Wortlängen- 265
- richness
- , lexical 370
- , vocabulary, 387, 389–390, 393
- Rückkoppelung, negative 328
- Ruhepunkt 691
- rule
- approach 705
- induction 829–80
- runs, theory of 363
- Russian formalist school 740
- S
- sample
- , ideal Zipfian 990
- , random 599
- size 244
- , stratified 599
- , systematic 599
- sampling 133, 370, 554–559, 599
- , stratified 555
- sandpile 363
- SARMA 745
- Sattel 692
- punktsverhalten 697
- Satzende 46
- Satzfolge, kohärente 325
- Satzgliederung 154
- Satzlänge 17, 20, 44, 153–154, 209, 213, 256, 298, 333–334, 339, 343, 665, 668, 684, 959, 961
- nfolge 154
- nverteilung 298, 959, 961
- nverteilung, Chinesisch 112
- Satzschachtelung 154
- Satzstruktur 153

- scaling 548  
 –, multidimensional 548, 561  
 Schachtelungsgrad 339  
 Scheinstammbaum 641  
 Schicht(ung), rhematische 432, 433  
 Schicht, Menzerath'sche 432, 433  
 Schichtung, Text- 433  
 Schiefe 507, 508  
 schizophrenia 990–991  
 Schlüssel, diagnostischer 584, 586  
 Schmetterling 692, 694, 702  
 Schnittcke 443–444  
 Schnittkante 443  
 Schnittmenge 443  
 Schrift  
 –, alphabetische 947, 963–964  
 –, Buchstaben- 951  
 –, chinesische 947–968  
 –, ideographische 948  
 –, kyrillische 963  
 –, logographische 948  
 –, morphosyllabische 948  
 –, piktographische 948  
 –zeichen, horizontal teilbar 958, 959  
 –zeichen, vertikal teilbar 958, 959  
 Schule  
 –, Charkover linguistische 33  
 –, Kazaner 27  
 –, Moskauer 27  
 Schwalbenschwanz 692  
 Schwellenwert 544  
 Schwierigkeit  
 –, artikulatorische 1  
 –sgrad 339  
 second language acquisition 117  
 Segment, Text- 330–331  
 segmentation, speech 837–839  
 Segmentierbarkeit 257  
 Segmentierung 331  
 –, Text- 339, 343  
 –, Wort-, Chinesisch 105–106  
 Segmentlänge 331  
 Selbstähnlichkeit 699  
 Selbstorganisation 4, 20, 150, 329, 330, 424  
 –sprozess 700  
 Selbstregulation 149, 329–330, 424–425, 784  
 Selbstsucht-Prinzip 782  
 selection 762–763  
 Selektivität 469  
 self-organisation 362, 365, 724, 732, 765, 887–888  
 –, evolutionary 764  
 self-regulation 648–650, 730, 874, 988  
 self-similarity 359–360, 733  
 Semantik  
 –, lexikalische 701  
 –, Prototypen- 784  
 Semem 459  
 Semiattraktivität 187  
 Semiotik 74–77  
 sense information 858, 870–871, 873  
 sentence  
 –, aggregate 351  
 –, complex, Czech 132  
 –, length – linearity – semantics 134  
 –, length 121, 134, 158, 293, 352, 371, 377, 390, 394, 652, 748, 912–913, 916  
 –, length, Czech 132  
 –, structure 377, 910  
 –, type 275  
 sequence 727  
 – of Japanese characters 941  
 sequencing, temporal 472  
 sequential order  
 –, degree of 743  
 –, measure of 743  
 Sequenz 36, 221–222, 330  
 –, binäre 332  
 series  
 –, positional 358  
 –, word frequency 358  
 set, self-similar 352  
 shortening 310  
 shorthand system 130  
 Signifikum 947  
 Silbe  
 –, betonte 34, 48  
 –nlänge 20, 208, 213, 256, 665, 669–670  
 –nrhythmus 584  
 –nstruktur 17, 70, 700  
 –nzählung 16  
 similarity 92, 116, 762  
 –, document 976  
 –, measure 563  
 simple object 292  
 simplicity 357, 792  
 simplification 276  
 Simpson's index of diversity 374  
 size  
 – of corpus 308  
 – of inventory 306, 762, 766, 771  
 – of lexicon 310, 765, 767, 769, 999  
 – of phoneme inventory 310, 767  
 – of vocabulary 399, 401, 995–997  
 Skala 7  
 –, deterministische 8  
 –, kontinuierliche 701  
 Skalierung, Multidimensionale 642  
 skewness 772  
 Skinners Hypothese 332  
 Soziogramm, textuelles 340  
 space, typological 757  
 Sparsamkeitsregel 661, 682  
 sparse-data problem 811, 822  
 Spearman's rank coefficient 755  
 specification 310  
 spectral analysis 744, 747  
 spectrum 400–401, 403  
 –, acoustic 836  
 –, frequency 772  
 speech  
 –, disorder 988  
 –, pathological 988  
 –, recognition 923  
 Spektralverteilung 336  
 Spektrum  
 –, Frequenz- 229–230, 335–337  
 –, lexikalisches 343  
 –, linguistisches 38  
 Spontaneität 335  
 Sprachbund 574  
 Sprache  
 –, !Xū 215, 223  
 –, Afrikanische 625  
 –, Ägyptisch 625  
 –, Albanisch 639, 642, 685  
 –, Altenglisch 583  
 –, Altfranzösisch 608, 624–625  
 –, Altgriechisch 210, 300, 583, 775  
 –, Althebräisch 268–269  
 –, Althochdeutsch 261, 268, 617  
 –, Althochdeutsch 702  
 –, Altiranisch 625  
 –, Altisländisch 269  
 –, Altkirchenslawisch 269, 583  
 –, Altpersisch 583  
 –, amerikanische 625  
 –, amorphe 460  
 –, analytische 460, 588–589  
 –, Anatolisch 642  
 –, Anjang 685  
 –, Arabisch 261, 583, 614, 625, 685  
 –, Armenisch 639  
 –, Asoka 583  
 –, Assyrisch 625  
 –, australische 625  
 –, baltische 625  
 –, Bambara 685  
 –, Bantu 642  
 –, Baskisch 511, 625  
 –, Bearnesisch 511  
 –, Bengali 583  
 –, Bulgarisch 225  
 –, Chinesisch 96–112, 234, 265, 268, 270, 300–302, 589, 625, 685, 947–969  
 –, Chinesisch: guoyu 947  
 –, Chinesisch: Mandarin 223, 947

- , Chinesisch: putonghua 947
- , Deutsch 18, 20, 24, 56, 144, 153, 211–212, 221–223, 228, 233–238, 255, 257, 261–262, 268–269, 271, 299–302, 426, 443, 458, 460–462, 467–468, 587, 589, 624, 660, 667–671, 673–674, 685, 701, 775, 947, 961–963
- , Deutsch, Hoch- 268–269, 271
- , Deutsch, Mittelhoch- 268
- , Deutsch, Nieder- 268
- , Deutsch, Schweizer- 268–269
- , dravidische 642
- , Englisch 153, 155, 211–213, 237, 255, 261–262, 269, 298, 300–301, 341–342, 458, 460, 462, 467, 583, 591, 594, 617, 620, 671, 673–674, 685, 702, 775, 947, 961–963
- , Englisch, amerikanisches 215, 536, 669
- , Eskimo 265, 268–269, 583
- , Esperanto 155
- , Estnisch 269, 460, 685
- , Ewon 685
- , Finnisch 269, 594
- , flektierende 580
- , Fränkisch 268
- , Frankoprovenzalisch 508, 511
- , Französisch 215, 221–222, 230, 235, 262, 499, 506–507, 587, 594, 607, 609, 611–613, 615–618, 620, 624–625, 641, 659, 678–679, 685, 775, 963
- , Friaulisch 506, 508
- , Frühneuhochdeutsch 268
- , fusionierende 584
- , Georgisch 223
- , germanische 624, 639, 641–642, 702
- , Gotisch 24, 583, 617
- , Griechisch 16, 208, 261, 269, 583, 617, 639, 685
- , Grönlandisch 261
- , Hawaiianisch 215, 223–224
- , Hebräisch 685
- , Hethitisch 583, 642
- , Hindi 223, 587, 685
- , Hochdeutsch 268–269, 271
- , Indianer- 261
- , indoeuropäische 261, 268–269, 468, 580, 587, 589–590, 609, 611, 617
- , indogermanische 642
- , Indonesisch 229, 231, 670–671
- , inkorporierende 580
- , Iranisch 624–625
- , Isländisch 271, 685
- , isolierende 580, 584, 587, 947
- , Italienisch 56, 223, 262, 506, 508–509, 609–613, 617, 619–620, 670–671, 685
- , italienisch 963
- , Jakutisch 583
- , Japanisch 265, 268, 589, 625, 685
- , Katalanisch 506, 616
- , kaukasische 224
- , Keltisch 625
- , Ketschua 268–269
- , Kirchenslawisch 24
- , klassisches Griechisch 269
- , Koine-Griechisch 269
- , Koreanisch 268, 685
- , Ladinisch 506, 533
- , Lappisch 270
- , Latein 24, 144, 155, 617, 222, 234, 261, 269, 609, 612, 619, 622, 951
- , Litauisch 616
- , Malayisch 625
- , Maltesisch 583
- , Maori 268, 594
- , Mazedonisch 225, 685
- , Mittelhochdeutsch 268
- , monosyllabische 947
- , Nahuatl 223
- , Neupersisch 583
- , Niederdeutsch 268
- , Niederländisch 229, 233, 237–238, 255, 594, 673–674, 685
- , Nootka 230
- , Norwegisch 589
- , Oskisch 610
- , ostasiatische 269
- , Persisch 685
- , Pfälzisch 268
- , poetische 75–76
- , Polnisch 238, 262, 609, 617, 624
- , polynesische 224–225
- , polysynthetische 592
- , Portugiesisch 678–680, 685
- , Portugiesisch, brasilianisches 234
- , Rätoromanisch 506
- , Rigveda 583
- , romanische 269, 271, 610, 616, 624, 637, 678
- , Rotokas 215
- , Rumänisch 610, 617, 624–625, 963
- , Russisch 23–64, 65–78, 184–186, 188, 225, 269, 301, 460–462, 593–594, 685, 583
- , Sanskrit 261
- , Schweizerdeutsch 268–269
- , Serbokroatisch 670–671, 685
- , slawische 269, 610, 616, 624–625
- , Slowakisch 300, 460, 685
- , Spanisch 611–613, 616, 625, 660, 678, 680, 685
- , Spanisch 963
- , Suaheli 583
- , synthetische 588–589
- , Tabassaranisch 588
- , Thai 223
- , Tibetanisch 625
- , Tschechisch 268, 624, 685
- , Tscheremissisch 269
- , Türkisch 223, 255, 268–269, 338–339, 583, 677, 685, 701
- , Ukrainisch 466
- , Ungarisch 233, 269, 460, 591, 625, 685
- , Urdu 587
- , Vietnamesisch 583
- Sprach-
  - gesetz 13, 271
  - kontakt 216
  - modell, synergetisches 334
  - statistik 25
  - theorie 12–13
  - typ 460, 586
  - typologie 17, 21, 71, 261, 498, 506, 682
  - typologie, funktionale morphologische 589–596
  - verarbeitungssystem 682, 685
  - verständlichkeit 220–221
  - wandel 702, 785
- Sprechaufwand 144
- Sprichwort, Längenverteilung 303
- Stabilität 329, 701
  - , strukturelle 691
- stability
  - , process 411
  - , static 411
  - , stylistic 369
- standard frequency index 316
- Stärke, assoziative 442
- statistical stereotype 320
- Status, phraseologischer 440
- Stern 692
- Sterndiagramm 643
- Stichprobengröße 40, 70
- Stil 17, 302
  - analyse 71
  - charakteristikum 327
  - , fachsprachlicher 462
  - merkmal 340
  - , regionaler 462
  - , umgangssprachlicher 462
  - , veralteter 462
- Stilistik, quantitative 339
- stock 555–556
- Störfaktor 667
- Störung 691
- stratification
  - , areal 556–557
  - , cultural 556
  - , genealogical 556–557

- Strichzahl 102, 955–957  
 – verteilung 955–956  
 Strophe 35  
 structural  
 – content 293  
 – description 292  
 structuralism 115, 122, 129–131, 739  
 structure  
 – fractal 716  
 – monomorphemic 756  
 – monosyllabic 756  
 – ordered 764  
 – polymorphemic 756  
 – polysemantic 756  
 – rhythmic 744  
 – self-similar 717  
 – sequential 738–748  
 Struktur  
 – begriff 327  
 – clausale 684, 685  
 – dynamische 702  
 – fraktale 694  
 – information 686  
 – phonologische 181  
 – semantisch-denotative 438  
 – semantische 459  
 – thematische 433  
 – typ 959  
 – Wort- 70, 227, 578–580  
 – Zusammenhangs- 345  
 Strukturalismus 61, 65, 67–68, 71, 76, 146  
 Strukturiertheit 424  
 style 369, 886  
 – profile 380  
 – functional 368, 377  
 stylistics, statistical 368  
 stylometrics 370–371  
 – Japanese 85, 90–91  
 stylometry 119–120, 392, 748  
 – positional 377  
 – probability 126  
 Substanz 425  
 subsystem 191  
 – syntactic 770–771  
 Subsystem  
 – grammatisches 634  
 – lexikalisches 634  
 – phonemisches 634  
 Sujet 41  
 suppletivism 126  
 supracontext 708  
 Supra-Satz-Konstrukt 425  
 S-word 725–726, 728, 734, 885  
 syllable  
 – duration 136–137  
 – frequency 191  
 – frequency, Japanese 83  
 – length 121  
 – type 651  
 Symmetrie 181  
 symmetry 198  
 – internal 360  
 – structural 359  
 syndrome, hallucinatory-para-  
 noid, 991  
 synergetics 760  
 – language 760–773, 792  
 Synergetik 19, 22, 423  
 – linguistische 330, 587, 629, 781  
 synergetisches Sprachmodell 334  
 synfunctionality 770  
 Synfunktionalität 783–784  
 Synkretismus 588  
 Synonym 426, 638  
 Synonymie 425–426  
 – Morphem- 228,  
 synonymy 647–649, 766, 768  
 – construction 308, 310–311  
 syntactic inventory 769  
 syntax 127  
 Synthesegrad 581  
 Syntheseindex 261  
 synthesis, degree of 559  
 syntheticism 306, 308  
 – measure of 764  
 Synthetizität 460, 588–589  
 system  
 – complex 305, 881, 883  
 – complex adaptive 717, 735, 878, 883–884, 886, 889  
 – complex dynamical 309  
 – concept 769  
 – dynamic 305, 410  
 – dissipative 878  
 – exemplar-based 705  
 – far from equilibrium 887–889  
 – hierarchical conceptual 769  
 – isolated 879, 887–889  
 – language 352  
 – lexical 308  
 – living 362  
 – modification 647  
 – non-linear 887  
 – open 305, 878  
 – of laws 765  
 – ordered 883  
 – random 883  
 – requirement 765  
 – self-organising 288, 305, 309, 760–761, 765,  
 – self-regulating 288, 309, 760, 765, 792  
 – semiotic 761  
 – syntactic 278  
 – s theory 305, 760–761, 792  
 System 3  
 – autonomes dynamisches 689  
 – bedürfnis 330, 631  
 – bedürfnis, konkurrierendes 330  
 – bedürfnis, kooperierendes 330  
 – chaotisches 690  
 – dissipatives 697  
 – dynamisches 329, 689, 691  
 – effizientes 216  
 – erregbares 697  
 – konservatives 697  
 – lineares dynamisches 689  
 – nichtlineares dynamisches 689  
 – offenes dynamisches 328  
 – organisation 688  
 – phonotaktisches 189, 190  
 – probabilistisches 330  
 – selbstorganisierendes 19, 684  
 – selbstregulierendes 19  
 – semiotisches 328  
 – textuelles 330  
 – theorie 4, 74, 327–330, 423  
  
 T  
 Taxierung 532  
 – algorithmus 532–547  
 Taxonomie, numerische 21, 584  
 taxonomy 116, 133  
 Teilsatzlänge 665  
 tempo 137, 988–999  
 tendency 305  
 Tendenz 8, 182, 339  
 – stochastische 214  
 – zur Assoziation 189  
 – zur Dissoziation 189  
 – zur grammatischen Ikonizität 787  
 – zur Verlängerung 46  
 term  
 – acquisition 971  
 – complex 977–979  
 – hood 972  
 – multi-word 977–979  
 – recognition 984–985  
 – vector 976  
 text  
 – block 286  
 – categorization 139  
 – classification 387  
 – compact 355–356, 359  
 – completeness 796  
 – comprehensibility 909–916  
 – count 473  
 – coverage 992  
 – deliberative 913  
 – emotionality 910  
 – entropy 874  
 – guessing 860–865  
 – informational structure of 865, 866  
 – law 348–360  
 – length 284, 308  
 – organization 910  
 – pathological 989–1000  
 – prosody 117

- segmentation 357
- shortness 910
- theory 348, 792
- to-speech systems 931
- type 137
- understandability 910
- Text 424
- Text, kohärenter 335–336, 338
- abdeckung 100, 336, 952–953
- aggregat 338–339, 668, 677
- algebra 325, 345
- analyse, denotative 423-
- block 338
- dynamik 4
- gesetz 326, 333, 335–339, 345
- gruppe 339–340
- indexierung 18
- klassifikation 341
- kohärenz 439–440
- kompaktheit 431
- kondensation 781, 785
- korpora 10, 11
- korpus, Brown 98
- korpus, Chinesisch 97–99, 106–112
- korpus, LOB 98
- korpus, russisches 34
- länge 14, 265, 434
- linguistik 325, 423
- linguistik, kommunikationsorientierte 325
- mischung 267, 270
- organisation 334, 341, 345
- organisation, statistische 325, 327, 331
- position 330
- potenz, konnotative 440
- produktion 326–327, 334
- produktionsprozess 330
- prozess, stochastischer 330, 333
- repräsentationsmodell 331
- rezeption 327
- schichtung 433
- schwierigkeit 261, 344
- segment 330–331
- segmentierung 339, 343
- sorte 259, 266, 268, 270, 302, 325, 336, 339–341, 443, 953
- statistik 325, 345
- struktur, assoziative 424
- struktur, konnotative 424
- strukturanalyse 445
- theorie 298, 326, 335, 345,
- topologie 325, 345
- typ 328
- typologie 76, 431
- umfang 337
- verarbeitungsprozess 329
- vokabular 4
- wissenschaft, erklärende 327
- , wissenschaftlicher 21
- Textem 436, 439
- Thema 424, 433
- thema-rhema 133
- Thema-Rhema 342, 431, 433
- Thematik 424
- theorem of Whitney 411
- Theorie 6, 8, 209, 423, 587, 687
- , allgemeine 162
- bildung 10, 19, 22, 71
- , linguistische 661
- theory 760, 764–765
- building 306, 646
- , general systems 310
- , linguistic 764
- , scientific 764
- Thiessen-Parkettierung 509, 510
- Thisted-Efron test 391
- thread, associative 996–998
- Tiefe 784
- time series 358, 390
- tonality 378
- Tondauer, Verteilung der 155
- Tonhöhe, Verteilung von 155
- top-down probability 292
- topic 471
- topicality quotient 477
- Topic-Comment 433, 342
- Topikalität 429–430
- Tornquist curve 367, 795
- Tornquist-Kurve 340
- Totalmaß, distributionelles 188
- Trägheit des Artikulierens 778
- training 811, 815
- Trajektorie 689, 696
- transcription 931
- transfer, punctual 415
- transformation 910
- , logarithmic 767
- Transkriptionscode, Redundanzfreiheit des 220
- Transkriptionsstring 536
- tree reconstruction 309
- Trennhöhenschätzer 639
- triggering, self-regulative 647
- trigram 859
- Trochäus 35, 48
- Typ 532–533, 579
- , agglutinierend 584–585
- , flektierend 584–585
- , introflexiv 584–585
- , isolierend 584–585
- , polysynthetisch 584–585
- , strukturell 580
- type
- identification 361
- , mixed 558
- , pure 558
- type-token 88
- curve, Köhler-Martináková's 795
- ratio (TTR) 120, 284–286, 305–307, 361–367, 374, 487, 488, 988, 999
- Type-Token-Index (TT-Modell, TT-Verhältnis, TT-Ratio) 333, 337–338, 433, 343
- Typologie 12, 75,77, 214
- , funktionale morphologische 579, 580
- , ideale 587
- , Inhalts- 587
- , klassische morphologische 578–581
- , kombinatorische 581
- , moderne funktionale 587
- , moderne morphologische 579–580, 587–589
- , monothetische 584
- , morphologische 578–596
- , polythetische 586
- , quantitative morphologische 581–583
- , strukturalistische 578, 583–587
- , Text- 76, 431
- , Wortstellungs- 592
- typology 134, 191, 472, 554–575
- , implicational 598
- , language 369
- , linguistic 275, 278, 598
- of transitions 558
- , word order 278
- U
- Übergang 340
- shäufigkeit 155
- swahrscheinlichkeit 3, 36
- Überschneidungsbeziehung 459
- Übersetzung, maschinelle 71–74
- Übertragungssicherheit 683
- Umfang 1
- , semantischer des Wortes 462
- uncertainty 727, 861, 879–880
- , compositional 252
- unfolding 411
- unification process 646–656
- , lexical 310
- Unifikation 147, 148, 232, 262
- skraft 4
- sprozess 331
- unit, syntactic 275–276,
- universal 282, 598
- , absolute 566
- , bidirectional 564
- , chained 565
- , extended implicational 565
- , implicational 564, 566–568
- , implicational 600
- , nested implicational 565
- , statistical 566
- Universale, implikatives 589, 596

- Universalienforschung 12, 214,  
     216, 682, 684  
 Urliste 635  
 urn model 246
- V
- Vagheit 8, 327, 701  
 valency 857  
 value 857  
 Variabilität 89, 327, 425, 441,  
     499, 535  
   –sbedürfnis 237  
 variability 392  
   –, degree of 754  
   –, sound 838  
 variable  
   –, formal-statistical (overt) 370  
   –, latent 370  
 variant  
   –, alternative 602–603  
   –, basic 602–603  
 Variation 458, 503, 579  
 variation 563, 598, 762  
   – linguistics 308  
   –, degree of 761  
   –, environmentally conditioned  
     647  
   –, orthographic 943  
   –, syntactic 274–275  
 Varietät 786  
 Veränderung 1  
 verb valence 413  
 Verb-Adjective-Ratio 276,  
 Verbundenheit 444  
 Vereinfachung 785  
   –sbedürfnis 237  
 Verfahren, kontextuelles 459  
 Vergleich 326–327  
 Verhältnis  
   –, Konsonanten/Vokale 56  
   –, Phonem-Graphem- 58  
 Verknüpfungsstruktur 345  
 Verschiedenheitsindex von Fucks  
     154  
 verse length 121  
 Vers  
   –forschung 31  
   –theorie 33  
   –typ 52  
   –wissenschaft 34  
 Verständlichkeit 261, 666  
 Verteilung 330–331  
   –, 1-verschobene negative Bino-  
     mial- 299–301  
   –, 1-verschobene Poisson- 268  
   –, 1-verschobenen Hyperpois-  
     son 210–213, 232, 258, 263,  
     301  
   –, Beta 338  
   –, Betonungs- 52  
   –, Binomial- 46–47, 187, 264,  
     338, 638, 955, 958  
   –, Bradford- 963  
   –, Čebanov-Fucks- 155  
   –, Cohen-Poisson- 960  
   –, Consul-Jain-Poisson- 264  
   –, Conway-Maxwell-Poisson-  
     264  
   –, Dacey-negative Binomial-  
     957  
   –, Dacey-Poisson- 270,  
     957–958  
   – der Graphemzahl 957–958  
   – der Hrebgröße 434  
   –, der Polysemie 461–462  
   –, der Satzlänge 298  
   –, der unbetonten Silben 46, 48  
   –, der Wortlänge 299  
   –, erweiterte positive Binomial-  
     269  
   –, Exponential- 149  
   –, Gamma- 215, 262  
   –, Gaußsche Normal- 155  
   –, gemischte 261,  
   –, gemischte negative Binomial-  
     233–234, 262  
   –, gemischte Poisson- 262, 270  
   –, geometrische 638  
   –, Gleich- 148  
   –, Häufigkeits- 11  
   –, Hirata- 264  
   –, Homographie- 951  
   –, Hyperbinomial- 957  
   –, hypergeometrische 436,  
     638–639  
   –, Hyperpascal- 264, 269–270,  
     299–302  
   –, Hyperpoisson- 55, 155, 259,  
     263, 265–266, 268–271, 302,  
     956, 958, 960  
   –, inverse Gauss-Poisson- 229  
   –, Lognormal- 229, 262, 299  
   –, negative Binomial- 155,  
     232–234, 262, 264, 270, 302,  
     332, 334, 955, 957, 961  
   –, negative hypergemonetrische  
     234, 338, 954–955  
   –, Normal- 11, 155, 583, 955  
   –, Palm-Poisson- 264  
   –, Poisson- 638  
   –, Poisson- 70, 261, 265, 269,  
     338, 950, 958  
   –, Pólya- 231  
   –, positive Cohen-Binomial-  
     958  
   –, positive Cohen-Poisson- 960  
   –, positive negative Binomial-  
     268, 269  
   –, positive Poisson- 268  
   –, positive Singh-Poisson- 269  
   –, Rangähnlichkeits- 344  
   –, Rang-Frequenz- 148, 231,  
     335, 435, 962–963  
   –, Satzlängen- 112, 959, 961  
   –sbegriff 327  
   –, Spektral- 336  
   –, Sprichwortlängen- 303  
   –, Strichzahl- 955–956  
   –, Thomas- 265  
   –, Tondauer- 155  
   –, Tonhöhe- 155  
   –, verallgemeinerte Dacey-Pois-  
     son- 957  
   –, verschobene Poisson- 154  
   –, von Wiederholungen 333  
   –, Wahrscheinlichkeits- 21, 334,  
     339  
   –, Waring- 434–435  
   –, Worthäufigkeits-, Chinesisch  
     98  
   –, Worthäufigkeits-, Englisch 98  
   –, Worthäufigkeits-, Latein 98  
   –, Wortklassen- (Wortarten-)  
     17, 55, 154, 951, 953–955  
   –, Wortlängen- 4, 52, 955, 959–  
     961  
   –, Yule-Simon- 229  
   –, Zipf-Alekseev- 234, 434–435  
   –, Zipf-Mandelbrot- 268, 435  
   –, zusammengesetzte Poisson-  
     299  
 Verträglichkeit 465  
   –, denotative 465–466  
   –, lexikalische 465–466  
   –, pragmatische 465–466  
 Verwandtschaft 641  
   –, genealogische 633–644  
 Verzögerung, Prinzip der 782  
 Verzweigungsstruktur 511  
 vocabulary  
   – measure 913  
   – richness 284, 306, 308, 361,  
     374, 375  
   – size 248, 400  
 voice system 482  
 Vokabular  
   –, gemeinsames 341  
   –, Text- 4  
   –reichtum 340  
   –reichtum, relativer 337  
   –umfang 336–338, 343  
   –wachstum 334, 336  
 Vokal  
   –epenthese 665  
   –harmonie 221, 701  
 Vollständigkeit von Texten 337  
 Voraussage 6, 12  
 Vorgängerphonem 183  
 Vorkommenskoeffizient 35  
 Voronoi-Diagramm 544–546  
 vowel  
   – harmony 195–197, 305  
   – perception 137
- W
- Wahrscheinlichkeit  
   –smaß 637–638  
   –sverteilung 21, 334, 339

## Wandel

- , analogischer 607
- , Bedeutungs- 951
- , Laut-144, 702
- prozess 216
- , Sprach- 702, 785
- Weg, kürzester 442
- weight
  - , informational 874
  - , typological 755
- weighting, term 976
- Whitney theorem 411
- Wiederholung 330–331, 345
  - , aggregative 332
  - , ähnlichkeitsaggregative 332
  - , assoziative 331
  - , blockmäßige 332
  - , formlose 331
  - , iterative 332
  - , positionale 331
  - srate 429
  - , zyklische 332
- word
  - abstractness 912
  - association 353, 373, 651–652
  - class 137, 192, 376, 649, 652, 992
  - classes, Czech 132
  - count, Japanese 87–88
  - entropy 390
  - , familiar 912
  - form, diagnostic 924
  - formation, Polish 118–119
  - frequency 122, 652, 717, 726–730, 772, 910
  - frequency distribution 244
  - , location 355–356
  - , low-frequency 403
  - length 122, 134, 158–159, 192, 202, 306–307, 310, 371, 373, 487–488, 649, 651–653, 762, 765, 767, 769, 871, 881, 910, 916
  - length, average 121, 280
  - order 134, 137, 278–281, 480, 560, 569, 598–605
  - order change 281
  - order coefficient 603–604
  - order consistency 603
  - order dominance 600
  - order flexibility 603
  - order, basic 600–601
  - order, dominant 600
  - order, free 600, 747
  - order, ideal 605
  - order, more frequent 600
  - order, recessive 600
  - order, rigid 600
  - spectrum 371
  - structure 307
  - structure, Japanese 89

- structure, phonic 191
- , unseen 399
- Wort 265
  - alter 6, 20, 148, 233–235, 331, 333, 339–340
  - art 460, 590, 701, 951–955, 961
  - artenhäufigkeit (Wortklassen-) 17, 55, 154, 953–954
  - artenverteilung (Wortklassen-) 951, 954–955
  - assoziation 366
  - betonung 144
  - bildung 227, 961
  - bildungsfähigkeit 101, 949–950
  - frequenz 17–18, 33–34, 55, 333, 341, 952
  - häufigkeitsverteilung, Chinesisch 98
  - häufigkeitsverteilung, Englisch 98
  - häufigkeitsverteilung, Latein 98
  - Hreb 425, 432
  - klasse 340
  - klassenhäufigkeit (Wortarten-) 17, 55, 154, 953–954
  - klassenübergang 154
  - klassenverteilung → Wortklassenhäufigkeit
  - länge 14, 16–17, 20, 22, 33, 51, 60, 144, 153–155, 208–209, 213–214, 222–223, 256, 259–271, 339, 343, 460, 665, 667–669, 672, 673–678–680, 684, 700, 947, 959–961
  - längenfrequenz 17, 29, 51, 55
  - längenrhythmus 265
  - längenverteilung 4, 52, 299, 955, 959–961
  - position 667
  - schatz 154, 951–955
  - schatzumfang 952
  - segmentierung, Chinesisch 105–106
  - stellungstypologie 592
  - struktur 70, 227, 578–580
  - verbindung, feste 466, 468
  - verbindung, freie 466
  - verbindung, lose 466, 468
- Wörterbuchtyp 460
- writing, Japanese 935–945
- Wurzelmorpheme, Produktivität 55

## Y

- Yule's characteristic *K* 120, 371, 374
- Yule-Herdan index 374

## Z

## Zahl

- , Zipfsche 336
- , zyklomatische 441
- Zählen, Zählung 2
- Zeichentheorie 74
- Zeit
  - reihe 332
  - schätzer 639
- Zentralität 442, 507
  - index, relativer 442–443
- Zentrum des Graphen 442
- Zipf line 989
- Zufall, Zufälligkeit 5, 325
- Zusammenhang 6, 8, 10, 12–13, 17–21, 45, 183, 214–226, 581, 590
  - , Akzent – Wortlänge 225–226
  - , Analytizität – Polysemie 459
  - , Artikulation – Deutlichkeit 144
  - , Entropie – Inventargröße 218
  - , Frequenz – Funktionskomplexität 966
  - , Funktionskomplexität – graphische Komplexität 966
  - , grammatische Funktion – semantische Funktion 239
  - , Graphemfrequenz-Funktionskomplexität 966–968
  - , graphische Komplexität – Frequenz 966–967
  - , Häufigkeit – Alter 148
  - , Häufigkeit – Auffälligkeit 98
  - , Häufigkeit – Produktionsaufwand 98
  - , Kasus – Genus 239
  - , Kompositumlänge – Kotextualität 239
  - , Kompositumlänge – Polysemie 239
  - , Kompositumlänge – semantische Korrespondenz 238
  - , Kotextualität – Komposita-bildung 239
  - , Länge – Frequenz 615
  - , latenter 188
  - , Lautdauer – Wortlänge 668
  - , linearer 49
  - , linguistische Ähnlichkeit – geographische Distanz 505
  - , Merkmals- 189
  - , Merkmalsredundanz – Sprachverständlichkeit 221
  - , Morphemlänge – Phonemanzahl – Wortlänge 224
  - , Morphempolylexie – Morphemhäufigkeit
  - , Morphinventarumfang – Morphopolylexie 235

- , Morphemlänge – Morphemhäufigkeit 237
- , Morphemlänge – Morphem-Token-Frequenz 255
- , Morphemlänge – Phonotaktik 255
- , Morphemlänge – Umfang des Morpheminventars 255
- , morphologischer Sprachtyp – Grammatikalisierungsprozess 588
- , Morph-Types – Morph-Tokens 237
- , Numerus – Kasus 239
- paradigmatische Redundanz – syntagmatische Redundanz 219
- , Phonemanzahl – Lexikongröße – Redundanz 223
- , Phonemanzahl – Wortlänge – Redundanz 222
- , Phoneminventar – Suprasegmentalia 224–225
- , Polylexie – Phrasenlänge 236
- , Polylexie – Zahl der Komposita 236–237
- , Polysemie – Frequenz 461
- , Polysemie – Länge 7
- , Polysemie – Wortlänge 460–461,
- , prozesshafter 326
- , quantitativer 2
- , Satzlänge – Teilsatzlänge 672, 675
- , semantische Relevanz – Anordnung im Lexem 239
- , semantische Relevanz des Affix – Reihenfolge der Affixe 595
- , semantischer 468
- skomponente 441, 443
- smaß, relatives 441
- , sprachliche Ikonizität – Frequenz 786
- , sprachliche Ikonizität – Performanz 786
- sstruktur 345
- , Stilart – Polysemie 463
- , Strichzahl – Graphemzahl 958
- , suprasegmentale Komplexität – Wortlänge 223
- , Type of exponence – Number of terms 588
- , Umfang – Frequenz 614
- , Umfang des Phoneminventars – durchschnittliche Morphemlänge 214
- , Wortalter – Kompositabildung 239
- , Wortbildungsaktivität – Häufigkeit des Morph-Types 237
- , Wortbildungsaktivität – Häufigkeit von Morph-Tokens 237
- , Worthäufigkeit – Wortbildungsaktivität 238
- , Wortlänge – Kompositionsaktivität 238
- , Wortlänge – Morphemlänge 671–672
- , Wortlänge – Morphemlänge 224
- , Wortlänge – Silbendauer 669
- , Wortlänge – Wortart 961
- , Wortlänge – Wortbildungsaktivität 238
- , Zahl der Komposita – semantische Korrespondenz 238
